# Supplementary material
Source: publisher figshare collection journal article supplement (https://acs.figshare.com/ndownloader/files/4494049)

## Supporting Information

### Highly Fluorescent BODIPY Dyes Modulated with Spirofluorene Moieties

Toshiyuki Kowada, Shuhei Yamaguchi, and Kouichi Ohe\*

*Department of Energy and Hydrocarbon Chemistry, Graduate School of Engineering, Kyoto*

*University, Katsura, Nishikyo-ku, Kyoto 615-8510, Japan*

*ohe@scl.kyoto-u.ac.jp*

### Experimental Section

**General.** Unless otherwise specified, all reagents were purchased from a chemical supplier and used without further purification. Tetrahydrofuran (THF) was distilled over benzophenone ketyl under nitrogen atmosphere. *N,N*-Dimethylformamide (DMF) was distilled over MS4A under nitrogen atmosphere. CH<sub>2</sub>Cl<sub>2</sub> was dried and collected using a Grubbs-type solvent purification system manufactured by Glass Contour. Melting points are uncorrected. <sup>1</sup>H and <sup>13</sup>C spectra were recorded on a JEOL AL-300 (300 MHz for <sup>1</sup>H, and 75.5 MHz for <sup>13</sup>C) instrument or a JEOL EX-400 (400 MHz for <sup>1</sup>H, and 100 MHz for <sup>13</sup>C) instrument. IR spectra were obtained on a JASCO 460 plus FT/IR spectrometer. Mass spectra were measured with a JEOL JMS-SX102A. Analytical thin-layer chromatography (TLC) was performed on Merck 60F<sub>254</sub> silica plates and visualized by UV light. Column chromatography was carried out on Silicycle SilicaFlash F60 60-63 μm (230-400 mesh) silica gel. Preparative HPLC was carried out with a Japan Analytical Industry Co., Ltd, LC-908 chromatograph using a JAIGEL-1H and -2H GPC columns. UV-visible absorption spectra were recorded on a JASCO V-570 UV-vis-NIR spectrometer. Emission spectra were measured with a Jobin Yvon-Horiba FluoroMax-3. Degassed spectral grade solvents were used for the measurements. Absolute fluorescence quantum yields were determined by the calibrated integrating sphere system. Cyclic voltammetry (CV) was performed on a BAS ALS 610C-S electrochemical analyzer. The CV cell consisted of a glassy carbon electrode, a Pt wire counter electrode, and an

Ag/AgNO<sub>3</sub> reference electrode. The measurement was carried out under argon atmosphere using solutions of samples (1 mM) and 0.1 M tetrabutylammonium hexafluorophosphate (Bu<sub>4</sub>NPF<sub>6</sub>) as a supporting electrolyte with a scan rate of 100 mV s<sup>-1</sup>. The redox potentials were calibrated with ferrocene as an internal standard.

### **9-(2-Bromophenyl)-9H-fluoren-9-ol (1)<sup>1</sup>**

The solution of 1-bromo-2-iodobenzene (34.9 g, 124 mmol) in dry THF (120 mL) was cooled to -40 °C. To the solution was added dropwise 1.0 M THF solution of isopropyl magnesium bromide (120 mL), prepared from isopropyl bromide and magnesium turnings. After stirring for 3 h, 9-fluorenone (14.4 g, 80.0 mmol) in dry THF (80 mL) was added over 25 min and stirred at room temperature for 12 h. The reaction mixture was quenched with saturated aqueous solution of NH<sub>4</sub>Cl (100 mL) and extracted with EtOAc (3 × 30 mL). The organic layers were combined, washed with brine (2 × 50 mL), and dried over MgSO<sub>4</sub>. The solvents were removed under reduced pressure to give a mixture of white solid and yellow oil. The crude product was purified by washing with hexane and the filtrate was purified with column chromatography on SiO<sub>2</sub> (EtOAc–hexane, 1:20) to give **1** (25.6 g, 95%) as a white solid; mp 145.2–146.0 °C. IR (KBr) 767, 920, 1005, 1157, 1333, 1448, 1604, 3063, 3571 cm<sup>-1</sup>. <sup>1</sup>H NMR (300 MHz, CDCl<sub>3</sub>): δ = 2.39 (br s, 1H), 7.13–7.25 (m, 5H), 7.36–7.47 (m, 4H), 7.67 (d, *J* = 7.7 Hz, 2H), 8.44 (br s, 1H). <sup>13</sup>C NMR (75.5 MHz, CDCl<sub>3</sub>): δ = 83.0, 120.2, 120.9, 123.9, 127.0, 128.3, 129.0, 129.1, 129.2, 134.3, 140.8, 141.3, 148.6.

### **9-(2-Bromophenyl)-9-(*N*-tosylpyrrol-3-yl)-9H-fluorene (2)**

To a solution of **1** (9.72 g, 28.8 mmol) and *N*-tosylpyrrole (6.94 g, 31.3 mmol) in CH<sub>2</sub>Cl<sub>2</sub> (200 mL) was added AlCl<sub>3</sub> (4.39 g, 32.9 mmol) portionwise, and the solution was stirred at room temperature for 3 h. The reaction mixture was quenched with water (60 mL) and extracted with CH<sub>2</sub>Cl<sub>2</sub> (3 × 30 mL). The organic layers were combined, washed with saturated aqueous solution of NaHCO<sub>3</sub> (2 × 40 mL) and brine (40 mL), and dried over MgSO<sub>4</sub>. The solvents were removed under

reduced pressure to give white solid. The crude product was purified by washing with  $\text{CHCl}_3$ –hexane (1:1) and the filtrate was purified with column chromatography on  $\text{SiO}_2$  (EtOAc–hexane, 1:20) to give **2** (14.5 g, 93%) as a white solid; mp 210.2–211.0 °C. IR (KBr) 605, 674, 746, 1065, 1101, 1172, 1253, 1371, 1464, 1596  $\text{cm}^{-1}$ .  $^1\text{H}$  NMR (300 MHz,  $\text{CDCl}_3$ ):  $\delta$  = 2.36 (s, 3H), 6.40 (br s, 1H), 6.61 (br s, 1H), 7.01–7.09 (m, 2H), 7.14–7.40 (m, 11H), 7.59 (d,  $J$  = 8.4 Hz, 2H), 7.71 (d,  $J$  = 7.7 Hz, 2H).  $^{13}\text{C}$  NMR (75.5 MHz,  $\text{CDCl}_3$ ):  $\delta$  = 21.6, 60.4, 115.6, 119.3, 120.4, 121.5, 123.0, 124.7, 126.76, 126.81, 127.4, 127.5, 128.6, 129.9, 131.8, 132.1, 135.4, 136.0, 141.1, 142.1, 144.9, 149.8. HRMS (FAB): calcd for  $\text{C}_{30}\text{H}_{23}^{81}\text{BrNO}_2\text{S}$  ( $\text{M}+\text{H}^+$ ), 542.0616, Found 542.0609.

**1'-Tosylspiro[fluorene-9,4'(1'*H*)-indeno[1,2-*b*]pyrrole (3a) and 2'-Tosylspiro[fluorene-9,4'(2'*H*)-indeno[1,2-*c*]pyrrole (3b)**

A flame dried flask was charged with **2** (14.5 g, 26.8 mmol),  $\text{K}_2\text{CO}_3$  (7.57 g, 54.8 mmol),  $\text{Pd}(\text{PPh}_3)_4$  (930 mg, 0.805 mmol), and dry DMF (200 mL) under nitrogen atmosphere. The solution was stirred at 100 °C for 20 h. The reaction mixture was cooled down to room temperature and filtered through a short silica gel pad. After an addition of water (150 mL), the filtrate was extracted with  $\text{CH}_2\text{Cl}_2$  (3  $\times$  30 mL). The organic layers were combined, washed with brine (7  $\times$  50 mL), and dried over  $\text{MgSO}_4$ . The solvents were removed under reduced pressure to give a mixture of white solid and brown oil. The crude product was purified by washing with  $\text{CHCl}_3$ –hexane (1:1) to give **3a** (7.77 g, 63%) as a white solid. The residue was purified with GPC ( $\text{CHCl}_3$ ) to afford **3b** (739 mg, 6%) as a white solid.

**3a**: A white solid; mp 256.5–257.3 °C. IR (KBr) 670, 699, 749, 1113, 1173, 1192, 1380, 1446, 1462, 1596, 3128  $\text{cm}^{-1}$ .  $^1\text{H}$  NMR (300 MHz,  $\text{CDCl}_3$ ):  $\delta$  2.42 (s, 3H), 5.86 (d,  $J$  = 3.3 Hz, 1H), 6.52 (d,  $J$  = 7.3 Hz, 1H), 6.63 (d,  $J$  = 7.7 Hz, 2H), 6.93 (dd,  $J$  = 7.5, 7.7 Hz, 1H), 7.07 (dd,  $J$  = 7.3, 7.5 Hz, 2H), 7.22 (d,  $J$  = 3.3 Hz, 1H), 7.28–7.36 (m, 5H), 7.78 (d,  $J$  = 7.7 Hz, 2H), 7.83 (d,  $J$  = 8.4 Hz, 2H), 8.15 (d,  $J$  = 7.7 Hz, 1H).  $^{13}\text{C}$  NMR (75.5 MHz,  $\text{CDCl}_3$ ):  $\delta$  21.6, 60.2, 108.7, 119.5, 120.0, 123.5, 123.6, 125.7, 126.76, 126.81, 127.6, 127.7, 127.8, 130.0, 134.0, 135.9, 138.2, 139.9, 141.8, 145.1, 146.4, 152.5.

HRMS (FAB): calcd for  $C_{30}H_{22}NO_2S$  ( $M+H^+$ ), 460.1371, Found 460.1364.

**3b**: A white solid; mp 212.7–213.6 °C. IR (KBr) 673, 752, 1053, 1089, 1166, 1187, 1362, 1446, 1595, 3063  $cm^{-1}$ .  $^1H$  NMR (400 MHz,  $CDCl_3$ ):  $\delta$  2.39 (s, 3H), 6.49 (d,  $J = 7.3$  Hz, 1H), 6.67 (d,  $J = 1.5$  Hz, 1H), 6.79 (d,  $J = 7.3$  Hz, 2H), 6.97 (dd,  $J = 7.3, 7.6$  Hz, 1H), 7.11 (dd,  $J = 7.3, 7.3$  Hz, 2H), 7.21–7.26 (m, 3H), 7.32–7.36 (m, 3H), 7.56 (d,  $J = 7.8$  Hz, 1H), 7.70 (d,  $J = 8.3$  Hz, 2H), 7.78 (d,  $J = 7.8$  Hz, 2H).  $^{13}C$  NMR (100 MHz,  $CDCl_3$ ):  $\delta$  21.6, 60.4, 110.0, 113.5, 119.9, 121.4, 124.1, 124.3, 126.8, 127.4, 127.69, 127.72, 127.8, 129.9, 135.3, 135.4, 136.1, 138.7, 140.8, 144.8, 149.6, 153.2. HRMS (FAB): calcd for  $C_{30}H_{22}NO_2S$  ( $M+H^+$ ), 460.1371, Found 460.1382.

### **Spiro[fluorene-9,4'(1'*H*)-indeno[1,2-*b*]pyrrole (sp-FIP)**

To a solution of **3a** (7.52 g, 16.4 mmol) in THF (300 mL) and MeOH (100 mL) was added 10% aqueous solution of NaOH (66 mL), and the solution was stirred at 65 °C for 3 h. After cooling to ambient temperature, MeOH was removed under reduced pressure and the residue was extracted with  $CHCl_3$  (3  $\times$  20 mL). The organic layers were combined, washed with water (2  $\times$  50 mL) and brine (50 mL), and dried over  $MgSO_4$ . The solvents were removed under reduced pressure to give brown solid. The crude product was purified by washing with  $CHCl_3$ –hexane (1:1) and the filtrate was purified with column chromatography on  $SiO_2$  (EtOAc–hexane, 1:15) to give **sp-FIP** (4.96 g, 99%) as a pale blue solid; mp 183.5–184.5 °C. IR (KBr) 748, 1444, 1606, 3060, 3414  $cm^{-1}$ .  $^1H$  NMR (300 MHz,  $CDCl_3$ ):  $\delta$  = 5.79 (dd,  $J = 1.7, 2.7$  Hz, 1H), 6.54 (d,  $J = 7.7$  Hz, 1H), 6.80–6.86 (m, 4H), 7.11 (dd,  $J = 7.3, 7.3$  Hz, 2H), 7.19 (dd,  $J = 7.3, 7.5$  Hz, 1H), 7.31–7.36 (m, 3H), 7.80 (d,  $J = 7.3$  Hz, 2H), 8.41 (br s, 1H).  $^{13}C$  NMR (75.5 MHz,  $CDCl_3$ ):  $\delta$  = 60.7, 103.9, 115.8, 119.8, 121.9, 123.6, 123.8, 124.3, 127.0, 127.4, 127.5, 133.7, 135.4, 137.8, 141.7, 148.5, 153.0. HRMS (FAB): calcd for  $C_{23}H_{16}N$  ( $M+H^+$ ), 306.1283, Found 306.1288.

### **A typical procedure for synthesis of 4a–e.**

To a solution of **sp-FIP** (611 mg, 2.00 mmol) and aldehyde (1.00 mmol) in dry  $CH_2Cl_2$  (20 mL)

was added two drops of TFA, and the solution was stirred at room temperature for 2–6 h under nitrogen atmosphere. The reaction mixture was quenched with 5% aqueous solution of NaHCO<sub>3</sub> (25 mL) and extracted with CHCl<sub>3</sub> (3 × 10 mL). The organic layers were combined, washed with brine (2 × 15 mL), and dried over MgSO<sub>4</sub>. The solvents were removed under reduced pressure, and the residue was purified with column chromatography on SiO<sub>2</sub> (EtOAc–hexane, 1:15) to afford **4**.

**4a**: A purple solid (86% yield); mp >300 °C. IR (KBr) 729, 747, 1280, 1338, 1444, 1474, 1520, 1604, 3059, 3436 cm<sup>-1</sup>. <sup>1</sup>H NMR (300 MHz, CDCl<sub>3</sub>): δ = 2.90 (s, 6H), 5.38 (s, 1H), 5.52 (s, 2H), 6.49 (d, *J* = 7.7 Hz, 2H), 6.65 (d, *J* = 8.8 Hz, 2H), 6.75–6.85 (m, 6H), 7.07–7.19 (m, 10H), 7.32 (dd, *J* = 7.3, 7.3 Hz, 4H), 7.77 (d, *J* = 7.7 Hz, 4H), 8.15 (br s, 2H). <sup>13</sup>C NMR (75.5 MHz, CDCl<sub>3</sub>): δ = 40.5, 44.6, 60.9, 103.1, 112.6, 115.6, 119.8, 123.6, 123.8, 123.9, 126.9, 127.3, 127.5, 129.0, 129.2, 133.6, 135.5, 137.2, 137.7, 141.6, 148.5, 149.5, 152.5. HRMS (FAB): calcd for C<sub>55</sub>H<sub>40</sub>N<sub>3</sub> (M+H<sup>+</sup>), 742.3222, Found 742.3237.

**4b**: A bluish purple solid (quantitative yield); mp >300 °C. IR (KBr) 729, 747, 1031, 1175, 1250, 1445, 1474, 1509, 1605, 3060, 3419 cm<sup>-1</sup>. <sup>1</sup>H NMR (300 MHz, CDCl<sub>3</sub>): δ = 3.76 (s, 3H), 5.44 (s, 1H), 5.51 (s, 2H), 6.48 (d, *J* = 7.7 Hz, 2H), 6.77–6.86 (m, 8H), 7.08–7.21 (m, 10H), 7.32 (dd, *J* = 7.3, 7.7 Hz, 4H), 7.78 (d, *J* = 7.7 Hz, 4H), 8.17 (br s, 2H). <sup>13</sup>C NMR (75.5 MHz, CDCl<sub>3</sub>): δ = 44.8, 55.2, 60.9, 103.3, 114.1, 115.7, 119.8, 123.67, 123.74, 124.1, 127.0, 127.4, 127.5, 129.5, 133.4, 133.7, 135.4, 137.1, 137.4, 141.7, 148.4, 152.6, 158.6. HRMS (FAB): calcd for C<sub>54</sub>H<sub>37</sub>N<sub>2</sub>O (M+H<sup>+</sup>), 729.2906, Found 729.2916.

**4c**: A bluish purple solid (66% yield); mp >300 °C. IR (KBr) 728, 746, 1280, 1444, 1474, 1510, 1605, 3058, 3410 cm<sup>-1</sup>. <sup>1</sup>H NMR (300 MHz, CDCl<sub>3</sub>): δ = 2.30 (s, 3H), 5.45 (s, 1H), 5.52 (s, 2H), 6.48 (d, *J* = 7.7 Hz, 2H), 6.77–6.85 (m, 6H), 7.08–7.21 (m, 12H), 7.33 (dd, *J* = 7.3, 7.5 Hz, 4H), 7.78 (d, *J* = 7.3 Hz, 4H), 8.17 (br s, 2H). <sup>13</sup>C NMR (75.5 MHz, CDCl<sub>3</sub>): δ = 21.0, 45.2, 60.9, 103.3, 115.7, 119.8,

123.6, 123.8, 124.1, 127.0, 127.4, 127.5, 128.4, 129.4, 133.6, 135.4, 136.7, 137.0, 137.4, 138.4, 141.7, 148.4, 152.6. HRMS (FAB): calcd for  $C_{54}H_{37}N_2$  ( $M+H^+$ ), 713.2957, Found 713.2977.

**4d**: A bluish purple solid (54% yield); mp >300 °C. IR (KBr) 728, 746, 1280, 1444, 1486, 1606, 3059, 3411  $cm^{-1}$ .  $^1H$  NMR (300 MHz,  $CDCl_3$ ):  $\delta$  = 5.41 (s, 1H), 5.48 (s, 2H), 6.49 (d,  $J$  = 7.3 Hz, 2H), 6.78–6.84 (m, 6H), 7.05–7.37 (m, 16H), 7.78 (d,  $J$  = 7.3 Hz, 4H), 8.18 (br s, 2H).  $^{13}C$  NMR (75.5 MHz,  $CDCl_3$ ):  $\delta$  = 45.0, 60.9, 103.6, 115.8, 119.9, 121.0, 123.6, 123.7, 124.3, 127.0, 127.46, 127.55, 130.2, 131.7, 133.8, 135.3, 136.1, 137.7, 140.4, 141.7, 148.2, 152.6. HRMS (FAB): calcd for  $C_{53}H_{33}^{79}BrN_2$  ( $M^+$ ), 776.1827, Found 776.1838.

**4e**: A pale purple solid (70% yield); mp >300 °C. IR (KBr) 747, 1104, 1281, 1444, 1608, 1720, 3056, 3415  $cm^{-1}$ .  $^1H$  NMR (300 MHz,  $CDCl_3$ )  $\delta$  = 3.86 (s, 3H), 5.50 (s, 2H), 5.53 (s, 1H), 6.50 (d,  $J$  = 7.3 Hz, 2H), 6.65–6.85 (m, 6H), 7.09–7.14 (m, 6H), 7.22–7.36 (m, 8H), 7.78 (d,  $J$  = 7.3 Hz, 4H), 7.92 (d,  $J$  = 8.1 Hz, 2H), 8.27 (br s, 2H).  $^{13}C$  NMR (75.5 MHz,  $CDCl_3$ ):  $\delta$  = 45.6, 52.1, 60.9, 103.7, 115.8, 119.9, 123.6, 123.7, 124.4, 127.1, 127.5, 127.6, 128.5, 129.0, 130.0, 133.8, 135.2, 135.7, 137.8, 141.7, 146.6, 148.2, 152.6, 166.7. HRMS (FAB): calcd for  $C_{55}H_{37}O_2N_2$  ( $M+H^+$ ), 757.2855, Found 757.2858.

#### A typical procedure for synthesis of BODIPY dyes **5a–e**.

To a solution of **4a–e** (0.52 mmol) in dry  $CH_2Cl_2$  (10 mL) was added dropwise DDQ (119 mg, 0.52 mmol) in dry  $CH_2Cl_2$  (10 mL) and the solution was stirred at room temperature for 1 h under nitrogen atmosphere.  $Et_3N$  (0.42 mL, 3.01 mmol) was then added, followed by an addition of 47% of  $BF_3 \cdot OEt$  (0.83 mL, 3.05 mmol). After stirring for 3 h, the reaction mixture was quenched with water (20 mL). The organic layer was washed with brine ( $2 \times 20$  mL), and dried over  $Na_2SO_4$ . The solvents were removed under reduced pressure, and the residue was purified with column chromatography on  $SiO_2$  ( $CHCl_3$ –hexane, 1:3) to afford **5a–e**.

**5a:** A purple solid (59% yield); mp >300 °C. IR (KBr) 747, 1068, 1098, 1196, 1268, 1338, 1364, 1402, 1464, 1556, 1601 cm<sup>-1</sup>. <sup>1</sup>H NMR (400 MHz, CDCl<sub>3</sub>): δ = 2.87 (s, 6H), 6.31 (s, 2H), 6.52 (d, *J* = 8.3 Hz, 2H), 6.63 (d, *J* = 7.3 Hz, 2H), 6.96 (d, *J* = 7.3 Hz, 4H), 7.14–7.19 (m, 6H), 7.27 (d, *J* = 8.8 Hz, 2H), 7.36 (dd, *J* = 7.3, 7.3 Hz, 4H), 7.49 (dd, *J* = 7.3, 7.7 Hz, 2H), 7.79 (d, *J* = 7.8 Hz, 4H), 8.49 (d, *J* = 7.3 Hz, 2H). <sup>13</sup>C NMR (100 MHz, CDCl<sub>3</sub>): δ = 40.0, 59.8, 111.3, 120.0, 120.6, 121.9, 124.08, 124.12, 124.2, 127.9 (two peaks are overlapped), 128.6, 129.9, 132.2, 132.9, 140.8, 141.3, 142.5, 143.5, 148.4, 151.6, 156.3, 160.2. HRMS (FAB): calcd for C<sub>55</sub>H<sub>36</sub>N<sub>3</sub>F<sub>2</sub>B (M<sup>+</sup>), 787.2980, Found 787.2959.

**5b:** A dark brown solid (73% yield); mp >300 °C. IR (KBr) 756, 1034, 1065, 1096, 1200, 1263, 1334, 1402, 1447, 1469, 1552, 1603 cm<sup>-1</sup>. <sup>1</sup>H NMR (400 MHz, CDCl<sub>3</sub>): δ = 3.69 (s, 3H), 6.22 (s, 2H), 6.63 (d, *J* = 7.8 Hz, 2H), 6.75 (d, *J* = 8.8 Hz, 2H), 6.95 (d, *J* = 7.8 Hz, 4H), 7.14–7.19 (m, 6H), 7.29 (d, *J* = 8.8 Hz, 2H), 7.36 (dd, *J* = 7.6, 7.8 Hz, 4H), 7.50 (dd, *J* = 7.6, 7.8 Hz, 2H), 7.79 (d, *J* = 7.3 Hz, 4H), 8.50 (d, *J* = 7.3 Hz, 2H). <sup>13</sup>C NMR (100 MHz, CDCl<sub>3</sub>): δ = 55.3, 59.7, 113.7, 120.0, 120.6, 124.17, 124.21, 124.3, 126.5, 127.9, 128.0, 128.7, 130.4, 131.9, 132.6, 141.1, 141.3, 142.1, 142.9, 148.2, 156.6, 161.0, 161.3. HRMS (FAB): calcd for C<sub>54</sub>H<sub>34</sub>ON<sub>2</sub>F<sub>2</sub>B (M+H<sup>+</sup>), 775.2741, Found 775.2733.

**5c:** A dark brown solid (61% yield); mp >300 °C. IR (KBr) 756, 1065, 1097, 1200, 1262, 1334, 1402, 1447, 1469, 1553, 1602 cm<sup>-1</sup>. <sup>1</sup>H NMR (400 MHz, CDCl<sub>3</sub>): δ = 2.24 (s, 3H), 6.20 (s, 2H), 6.64 (d, *J* = 7.8 Hz, 2H), 6.95 (d, *J* = 7.8 Hz, 4H), 7.05 (d, *J* = 7.8 Hz, 2H), 7.15–7.26 (m, 8H), 7.36 (dd, *J* = 7.3, 7.3 Hz, 4H), 7.51 (dd, *J* = 7.6, 7.8 Hz, 2H), 7.79 (d, *J* = 7.8 Hz, 4H), 8.49 (d, *J* = 7.8 Hz, 2H). <sup>13</sup>C NMR (100 MHz, CDCl<sub>3</sub>): δ = 21.2, 59.7, 120.0, 120.7, 124.17, 124.23, 124.3, 127.9, 128.0, 128.7, 128.8, 130.3, 130.4, 131.2, 132.5, 140.1, 141.1, 141.3, 142.4, 143.0, 148.2, 156.7, 161.5. HRMS (FAB): calcd for C<sub>54</sub>H<sub>33</sub>N<sub>2</sub>F<sub>2</sub>B (M<sup>+</sup>), 758.2714, Found 758.2708.

**5d:** A dark brown solid (59% yield); mp >300 °C. IR (KBr) 738, 761, 1065, 1096, 1196, 1262, 1333, 1401, 1447, 1469, 1552, 1601 cm<sup>-1</sup>. <sup>1</sup>H NMR (400 MHz, CDCl<sub>3</sub>): δ = 6.15 (s, 2H), 6.65 (d, *J* = 7.8 Hz,





The reaction mixture was diluted with cold water (80 mL) and extracted with CH<sub>2</sub>Cl<sub>2</sub> (4 × 15 mL). The organic layers were combined, washed with saturated aqueous solution of NaHCO<sub>3</sub> (2 × 50 mL) and brine (50 mL), and dried over MgSO<sub>4</sub>. The solvents were removed under reduced pressure, and the residue was purified with GPC (CHCl<sub>3</sub>) to afford **10** (666 mg, 11%) as a pale yellow oil; mp 97.8–98.7 °C. IR (KBr) 589, 681, 803, 1058, 1173, 1357, 1596, 2964 cm<sup>-1</sup>. <sup>1</sup>H NMR (300 MHz, CDCl<sub>3</sub>) δ = 1.67 (s, 6H), 2.40 (s, 3H), 5.91 (dd, *J* = 1.8, 3.3 Hz, 1H), 6.88 (dd, *J* = 1.8, 1.8 Hz, 1H), 7.02–7.07 (m, 2H), 7.24–7.29 (m, 3H), 7.44 (dd, *J* = 1.5, 8.1 Hz, 1H), 7.50 (dd, *J* = 1.8, 8.1 Hz, 1H), 7.70 (d, *J* = 8.4 Hz, 2H). <sup>13</sup>C NMR (75.5 MHz, CDCl<sub>3</sub>) δ = 21.6, 29.7, 40.0, 113.6, 117.5, 120.9, 123.7, 126.7, 127.2, 128.0, 129.7, 135.5, 136.5, 138.3, 144.6, 146.0. HRMS (FAB): calcd for C<sub>20</sub>H<sub>21</sub>O<sub>2</sub>N<sup>81</sup>BrS (M+H<sup>+</sup>), 420.0457, Found 420.0451.

#### 4,4-Dimethyl-1-tosyl-1,4-dihydroindeno[1,2-*b*]pyrrole (**11**)

A flame dried Schlenk flask was charged with **10** (604 mg, 1.44 mmol), K<sub>2</sub>CO<sub>3</sub> (399 mg, 2.88 mmol), Pd(PPh<sub>3</sub>)<sub>4</sub> (50.2 mg, 0.0434 mmol), and dry DMF (15 mL) under nitrogen atmosphere. The solution was stirred at 100 °C for 13 h. The reaction mixture was cooled down to room temperature and filtered through a short silica gel pad. After an addition of CH<sub>2</sub>Cl<sub>2</sub> (20 mL), the filtrate was washed with 10% aqueous solution of NaCl (5 × 40 mL), and dried over MgSO<sub>4</sub>. The solvents were removed under reduced pressure to give a pale brown solid. The crude product was purified by GPC (CHCl<sub>3</sub>) to give **11** (254 mg, 52%) as a colorless oil. IR (neat) 539, 768, 1051, 1363, 1597, 2359, 2964 cm<sup>-1</sup>. <sup>1</sup>H NMR (300 MHz, CDCl<sub>3</sub>) δ = 1.36 (s, 6H), 2.34 (s, 3H), 6.31 (d, *J* = 3.3 Hz, 1H), 7.14–7.32, (m, 6H), 7.75 (d, *J* = 8.4 Hz, 2H), 8.03 (d, *J* = 7.3 Hz, 1H). <sup>13</sup>C NMR (75.5 MHz, CDCl<sub>3</sub>) δ = 21.6, 25.8, 42.0, 107.7, 119.4, 122.2, 124.8, 125.9, 126.7, 127.0, 130.0, 132.2, 134.4, 136.1, 144.8, 145.9, 157.1. HRMS (FAB): calcd for C<sub>20</sub>H<sub>19</sub>NO<sub>2</sub>S (M<sup>+</sup>), 337.1137, Found 337.1130.

#### 4,4-Dimethyl-1,4-dihydroindeno[1,2-*b*]pyrrole (**12**)

To a solution of **11** (253 mg, 0.750 mmol) in THF (7 mL) and MeOH (3.5 mL) was added 10%

aqueous solution of NaOH (3 mL), and the solution was stirred at 65 °C for 7 h. After cooling to ambient temperature, the reaction mixture was diluted with cold water (10 mL) and MeOH was removed under reduced pressure. The residue was extracted with EtOAc (3 × 5 mL). The organic layers were combined, washed with brine (2 × 20 mL), and dried over MgSO<sub>4</sub>. The solvents were removed under reduced pressure, and the residue was purified with column chromatography on SiO<sub>2</sub> (EtOAc–hexane, 1:3) to afford **12** (101 mg, 73%) as a pale blue solid; mp 130.6–131.3 °C. IR (KBr) 711, 754, 1063, 1454, 1610, 2959, 3370 cm<sup>-1</sup>. <sup>1</sup>H NMR (300 MHz, CDCl<sub>3</sub>) δ = 1.45 (s, 6H), 6.21 (dd, *J* = 1.8, 2.8 Hz, 1H), 6.82 (dd, *J* = 2.4, 2.4 Hz, 1H), 7.06–7.11 (m, 1H), 7.17–7.25 (m, 2H), 7.33 (d, *J* = 7.3 Hz, 1H), 8.22 (br s, 1H). <sup>13</sup>C NMR (75.5 MHz, CDCl<sub>3</sub>) δ = 26.6, 42.4, 102.9, 115.9, 121.2, 122.5, 123.6, 126.4, 133.5, 134.0, 140.4, 157.5. HRMS (FAB): calcd for C<sub>13</sub>H<sub>14</sub>N (M+H<sup>+</sup>), 184.1126, Found 184.1122.

### BODIPY Dye 6

To a solution of **12** (94.8 mg, 0.517 mmol) in dry CH<sub>2</sub>Cl<sub>2</sub> (6 mL) was added two drops of TFA, and the solution was stirred at room temperature for 2 h under nitrogen atmosphere. The reaction mixture was quenched with saturated aqueous solution of NaHCO<sub>3</sub> (10 mL) and extracted with CH<sub>2</sub>Cl<sub>2</sub> (3 × 5 mL). The organic layers were combined, washed with brine (2 × 20 mL), and dried over MgSO<sub>4</sub>. The solvents were removed under reduced pressure, and the residue was partially purified with column chromatography on SiO<sub>2</sub> (CH<sub>2</sub>Cl<sub>2</sub>–hexane, 4:1) to afford a crude product (49.7 mg) as a blue solid. The crude product was then dissolved in dry CH<sub>2</sub>Cl<sub>2</sub> (8 mL). After an addition of DDQ (23.8 mg, 0.105 mmol) in dry CH<sub>2</sub>Cl<sub>2</sub> (6 mL), the solution was stirred at room temperature for 1 h under nitrogen atmosphere. *i*Pr<sub>2</sub>NEt<sub>2</sub> (0.105 mL, 0.603 mmol) and BF<sub>3</sub>·OEt<sub>2</sub> (0.165 mL, 0.606 mmol) were successively added and after 4 h, the reaction mixture was washed with 10% aqueous solution of NaCl (4 × 20 mL), and dried over Na<sub>2</sub>SO<sub>4</sub>. The solvents were removed under reduced pressure, and the residue was partially purified with column chromatography on SiO<sub>2</sub> (CH<sub>2</sub>Cl<sub>2</sub>–hexane, 1:3) to afford **6** (30.1 mg, 56%) as a dark brown solid; mp >300 °C. IR (KBr) 759, 1060, 1088, 1278,

1335, 1552, 1603, 2966  $\text{cm}^{-1}$ .  $^1\text{H}$  NMR (300 MHz,  $\text{CDCl}_3$ )  $\delta$  = 1.47 (s, 12H), 3.92 (s, 3H), 6.55 (s, 2H), 7.07 (d,  $J$  = 8.8 Hz, 2H), 7.38–7.45 (m, 6H), 7.56 (d,  $J$  = 8.4 Hz, 2H), 8.30 (d,  $J$  = 7.0 Hz, 2H).  $^{13}\text{C}$  NMR (75.5 MHz,  $\text{CDCl}_3$ )  $\delta$  = 27.1, 41.9, 55.5, 113.8, 119.3, 122.7, 124.2, 127.2, 127.9, 129.7, 130.8, 132.0, 140.6, 141.1, 148.6, 158.8, 160.87, 160.91. HRMS (FAB): calcd for  $\text{C}_{34}\text{H}_{29}\text{ON}_2\text{F}_2\text{B}$  ( $\text{M}^+$ ), 530.2347, Found 530.2351.

## References

- 1) Arts, H. J.; Kranenburg, M.; Meijers, R. H. A. M.; Ijpeij, E. G.; Gruter, G. J. M.; Beijer, F. H. EP1059300 (A1) **2000**.
- 2) Sigmundová, I.; Uhlár, J.; Toma, Š. *Synth. Commun.* **2004**, *34*, 3667–3672.

**Data of X-ray crystallographic analysis:**

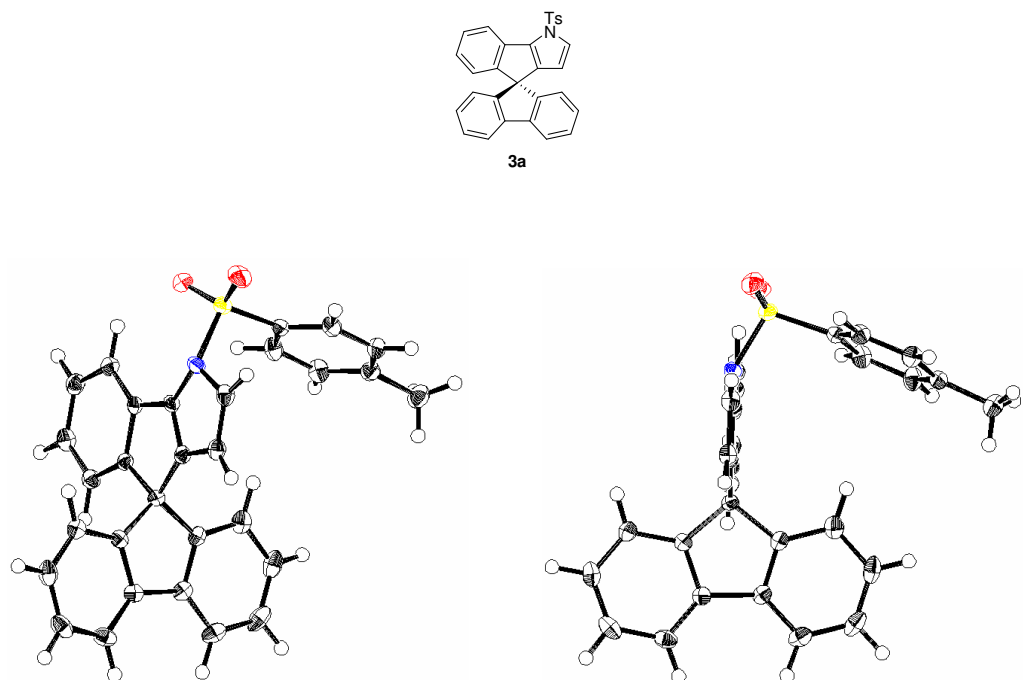

**Figure S1.** ORTEP drawings of **3a**.

**Table S1.** Crystal data and structure refinement for **3a**

|                                              |                                                    |                 |
|----------------------------------------------|----------------------------------------------------|-----------------|
| Empirical Formula                            | C <sub>30</sub> H <sub>21</sub> N O <sub>2</sub> S |                 |
| Formula Weight                               | 459.56                                             |                 |
| Temperature (°C)                             | −120                                               |                 |
| Crystal Color, Habit                         | colorless, block                                   |                 |
| Crystal Dimensions                           | 0.40 × 0.40 × 0.20 mm                              |                 |
| Crystal System                               | triclinic                                          |                 |
| Lattice Parameters                           | a = 10.327(4) Å                                    | α = 75.268(15)° |
|                                              | b = 10.808(5) Å                                    | β = 65.992(11)° |
|                                              | c = 11.555(4) Å                                    | γ = 89.308(19)° |
|                                              | V = 1133.3(8) Å <sup>3</sup>                       |                 |
| Space Group                                  | P-1 (#2)                                           |                 |
| Z value                                      | 2                                                  |                 |
| D <sub>calc</sub>                            | 1.347 g/cm <sup>3</sup>                            |                 |
| F(000)                                       | 480.00                                             |                 |
| μ(MoKα)                                      | 1.719 cm <sup>−1</sup>                             |                 |
| Radiation                                    | MoKα (λ = 0.71070 Å)                               |                 |
|                                              | graphite monochromated                             |                 |
| 2θ max                                       | 61.8°                                              |                 |
| No. of Reflections Measured                  | Total: 10126                                       |                 |
|                                              | Unique: 5815 (R <sub>int</sub> = 0.027)            |                 |
| Structure Solution                           | Direct Methods (SIR92)                             |                 |
| Refinement                                   | Full-matrix least-squares on F <sup>2</sup>        |                 |
| No. Observations (All reflections)           | 5815                                               |                 |
| No. Variables                                | 391                                                |                 |
| Reflection/Parameter Ratio                   | 14.87                                              |                 |
| Residuals: R <sub>1</sub> (I>2.00σ(I))       | 0.0470                                             |                 |
| Residuals: wR <sub>2</sub> (All reflections) | 0.0762                                             |                 |
| Goodness-of-fit on F <sup>2</sup>            | 1.097                                              |                 |
| Max Shift/Error in Final Cycle               | 0.000                                              |                 |
| Maximum peak in Final Diff. Map              | 0.38 e <sup>−</sup> /Å <sup>3</sup>                |                 |
| Minimum peak in Final Diff. Map              | −0.60 e <sup>−</sup> /Å <sup>3</sup>               |                 |

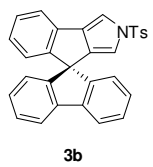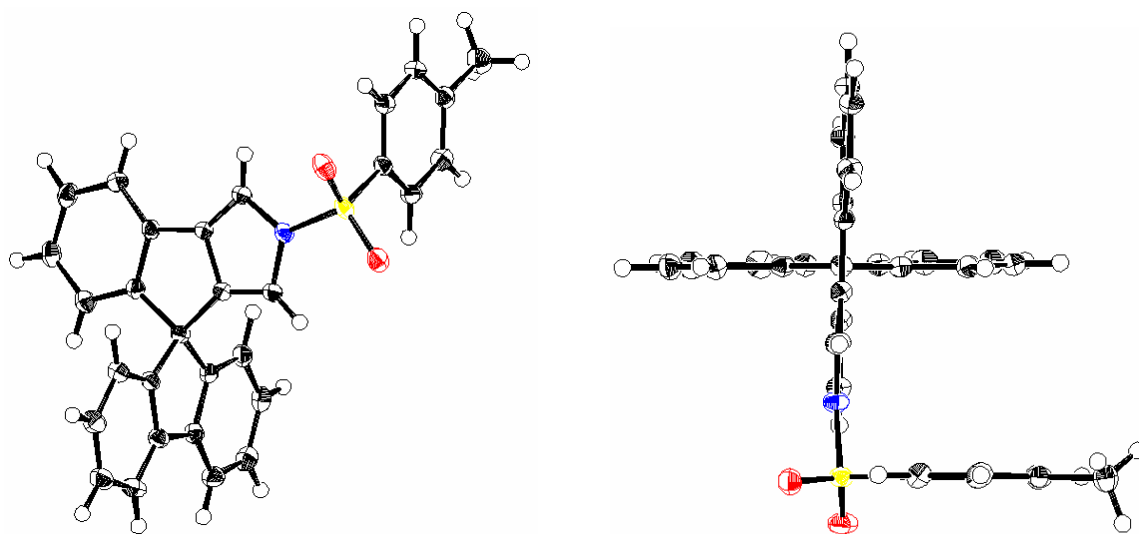

**Figure S2.** ORTEP drawings of **3b**.

**Table S2.** Crystal data and structure refinement for **3b**

|                                              |                                                                                                           |
|----------------------------------------------|-----------------------------------------------------------------------------------------------------------|
| Empirical Formula                            | C <sub>30</sub> H <sub>21</sub> N O <sub>2</sub> S                                                        |
| Formula Weight                               | 459.56                                                                                                    |
| Temperature (°C)                             | −120                                                                                                      |
| Crystal Color, Habit                         | colorless, block                                                                                          |
| Crystal Dimensions                           | 0.20 × 0.20 × 0.20 mm                                                                                     |
| Crystal System                               | monoclinic                                                                                                |
| Lattice Parameters                           | a = 12.330(4) Å<br>b = 8.447(3) Å      β = 95.906(4)°<br>c = 21.697(7) Å<br>V = 2247.6(13) Å <sup>3</sup> |
| Space Group                                  | <i>P</i> 2 <sub>1</sub> / <i>a</i> (#14)                                                                  |
| Z value                                      | 4                                                                                                         |
| D <sub>calc</sub>                            | 1.358 g/cm <sup>3</sup>                                                                                   |
| F(000)                                       | 960.00                                                                                                    |
| μ(MoKα)                                      | 1.733 cm <sup>−1</sup>                                                                                    |
| Radiation                                    | MoKα (λ = 0.71070 Å)<br>graphite monochromated                                                            |
| 2θ max                                       | 62.1°                                                                                                     |
| No. of Reflections Measured                  | Total: 19437<br>Unique: 6398 (R <sub>int</sub> = 0.040)                                                   |
| Structure Solution                           | Direct Methods (SIR92)                                                                                    |
| Refinement                                   | Full-matrix least-squares on F <sup>2</sup>                                                               |
| No. Observations (All reflections)           | 6398                                                                                                      |
| No. Variables                                | 391                                                                                                       |
| Reflection/Parameter Ratio                   | 16.36                                                                                                     |
| Residuals: R <sub>1</sub> (I>2.00σ(I))       | 0.0475                                                                                                    |
| Residuals: wR <sub>2</sub> (All reflections) | 0.0738                                                                                                    |
| Goodness-of-fit on F <sup>2</sup>            | 1.027                                                                                                     |
| Max Shift/Error in Final Cycle               | 0.000                                                                                                     |
| Maximum peak in Final Diff. Map              | 0.47 e <sup>−</sup> /Å <sup>3</sup>                                                                       |
| Minimum peak in Final Diff. Map              | −0.45 e <sup>−</sup> /Å <sup>3</sup>                                                                      |

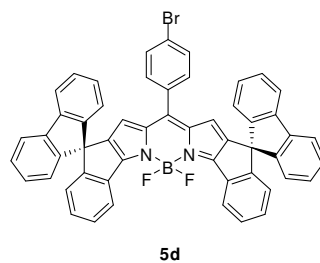

a)

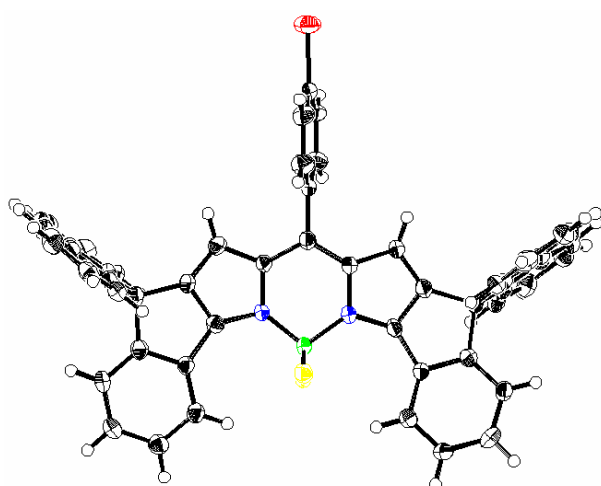

b)

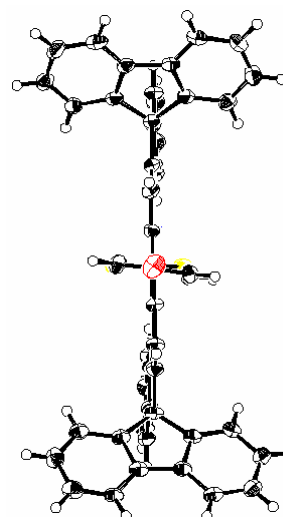

**Figure S3.** ORTEP drawings of **5d**. a) Front view; b) Top view. Solvent molecules have been omitted for clarity.



**Table S3.** Crystal data and structure refinement for **5d**

|                                              |                                                                                                            |
|----------------------------------------------|------------------------------------------------------------------------------------------------------------|
| Empirical Formula                            | C <sub>53</sub> H <sub>30</sub> Br F <sub>2</sub> N <sub>2</sub> · C H Cl <sub>3</sub>                     |
| Formula Weight                               | 942.92                                                                                                     |
| Temperature (°C)                             | −120                                                                                                       |
| Crystal Color, Habit                         | green, block                                                                                               |
| Crystal Dimensions                           | 0.20 × 0.20 × 0.20 mm                                                                                      |
| Crystal System                               | monoclinic                                                                                                 |
| Lattice Parameters                           | a = 12.794(3) Å<br>b = 17.775(5) Å      β = 90.835(4)°<br>c = 18.865(5) Å<br>V = 4289.5(20) Å <sup>3</sup> |
| Space Group                                  | <i>P</i> 2 <sub>1</sub> / <i>a</i> (#14)                                                                   |
| Z value                                      | 4                                                                                                          |
| D <sub>calc</sub>                            | 1.460 g/cm <sup>3</sup>                                                                                    |
| F(000)                                       | 1912.00                                                                                                    |
| μ(MoKα)                                      | 11.982 cm <sup>−1</sup>                                                                                    |
| Radiation                                    | MoKα (λ = 0.71070 Å)<br>graphite monochromated                                                             |
| 2θ max                                       | 62.1°                                                                                                      |
| No. of Reflections Measured                  | Total: 37442<br>Unique: 11715 (R <sub>int</sub> = 0.041)                                                   |
| Structure Solution                           | Direct Methods (SIR92)                                                                                     |
| Refinement                                   | Full-matrix least-squares on F <sup>2</sup>                                                                |
| No. Observations (All reflections)           | 11715                                                                                                      |
| No. Variables                                | 590                                                                                                        |
| Reflection/Parameter Ratio                   | 19.86                                                                                                      |
| Residuals: R <sub>1</sub> (I > 2.00σ(I))     | 0.0801                                                                                                     |
| Residuals: wR <sub>2</sub> (All reflections) | 0.1375                                                                                                     |
| Goodness-of-fit on F <sup>2</sup>            | 1.014                                                                                                      |
| Max Shift/Error in Final Cycle               | 0.000                                                                                                      |
| Maximum peak in Final Diff. Map              | 2.06 e <sup>−</sup> /Å <sup>3</sup>                                                                        |
| Minimum peak in Final Diff. Map              | −1.65 e <sup>−</sup> /Å <sup>3</sup>                                                                       |

**Table S4.** Photophysical properties of **5a** in various solvents<sup>a</sup>

| solvent           | $\lambda_{\text{abs}}$ [nm] | $\lambda_{\text{em}}$ [nm] | $\epsilon_r^b$ | $\Phi_F^c$ |
|-------------------|-----------------------------|----------------------------|----------------|------------|
| DMF               | 628                         | 637                        | 36.7           | 0.06       |
| THF               | 627                         | 636                        | 7.52           | 0.16       |
| CHCl <sub>3</sub> | 631                         | 639                        | 4.81           | 0.73       |
| benzene           | 631                         | 638                        | 2.28           | 0.78       |

<sup>a</sup>  $c = 1.00 \times 10^{-6}$  M <sup>b</sup> Relative dielectric constant <sup>c</sup> Determined by the calibrated integrating sphere system

**Table S5.** Cartesian atomic coordinates for the geometry optimized structure of **9** (B3LYP/6-31G(d)).

| atom | x             | y             | z             |
|------|---------------|---------------|---------------|
| C    | 0.2725108739  | -1.0514936071 | -1.3249863605 |
| N    | -0.6401901250 | -0.0098596746 | -1.0999803045 |
| B    | -0.4617015318 | 1.0957524529  | -0.0054301105 |
| N    | 0.5516944447  | 0.5029114922  | 1.0308337835  |
| C    | 1.4359503516  | -0.5509598336 | 0.7549765440  |
| C    | 1.2948244978  | -1.2966197104 | -0.4122395345 |
| C    | -0.0884777679 | -1.7437147539 | -2.5207715937 |
| F    | -1.6820452530 | 1.3581990334  | 0.6140226282  |
| C    | -1.2187435989 | -1.1140435675 | -3.0019526871 |
| F    | 0.0600345121  | 2.2448207299  | -0.5737847811 |
| C    | 0.9005493991  | 0.9841479904  | 2.2359155895  |
| C    | 2.0062974717  | 0.2734239698  | 2.7637238432  |
| C    | 2.3515983516  | -0.6939392826 | 1.8414990518  |
| C    | -1.5285536060 | -0.0608878059 | -2.1068157682 |
| C    | -2.2158260134 | -1.1555217286 | -4.1439447610 |
| C    | -3.1300971042 | 0.0278168165  | -3.7514268712 |
| C    | 0.4788377045  | 2.0226488862  | 3.1529558097  |
| C    | 1.3548238969  | 1.9572889617  | 4.2667245876  |
| C    | 2.4044906427  | 0.8322111659  | 4.1162175282  |
| C    | -0.5569069025 | 2.9623618745  | 3.1056977806  |
| C    | -0.6956464155 | 3.8469990882  | 4.1748611698  |
| C    | 0.1747211520  | 3.7914205371  | 5.2705753833  |
| C    | 1.2032047629  | 2.8428041311  | 5.3242643462  |
| C    | -2.7100922406 | 0.6507340099  | -2.5482332356 |
| C    | -4.2494573212 | 0.4970019009  | -4.4240439994 |
| C    | -4.9509186515 | 1.5863185736  | -3.8931249091 |
| C    | -4.5406730327 | 2.1928396122  | -2.6993707620 |
| C    | -3.4189999008 | 1.7310682435  | -2.0112147571 |
| H    | 1.9856751600  | -2.1119840887 | -0.6024569736 |
| H    | 0.4405400052  | -2.5963675261 | -2.9263556797 |
| H    | 3.1375899265  | -1.4360297228 | 1.8952952882  |
| C    | -1.5914802841 | -1.0050799844 | -5.5353533280 |
| C    | -2.9692324350 | -2.4816459752 | -4.2913546089 |
| C    | 3.8498105465  | 1.3358777009  | 4.1925611009  |
| C    | 2.3757596547  | -0.1821680247 | 5.2643316773  |
| H    | -1.2352976818 | 2.9825398538  | 2.2606128711  |

|   |               |               |               |
|---|---------------|---------------|---------------|
| H | -1.4916353795 | 4.5863094822  | 4.1585655001  |
| H | 0.0483587787  | 4.4901407627  | 6.0932208368  |
| H | 1.8706665552  | 2.8007146389  | 6.1806085133  |
| H | -4.5772829882 | 0.0267221622  | -5.3470658777 |
| H | -5.8281715717 | 1.9619999243  | -4.4129458430 |
| H | -5.1051850995 | 3.0317432441  | -2.3018652148 |
| H | -3.1019999646 | 2.1794815584  | -1.0767491858 |
| C | -0.7770843236 | 0.0136002176  | -6.0144011169 |
| C | -1.9488093821 | -2.0895570784 | -6.3584762882 |
| C | -3.7335199614 | -3.154624609  | -3.3461483236 |
| C | -2.8022082410 | -3.0045857985 | -5.5876398718 |
| C | 1.3211526199  | -0.9800773871 | 5.6904717862  |
| C | 3.6271432872  | -0.2385850353 | 5.9066515560  |
| C | 4.4833241996  | 2.2767678574  | 3.3901752141  |
| C | 4.5403413411  | 0.7022017445  | 5.2427649095  |
| C | -1.4876859483 | -2.1565075546 | -7.6748846811 |
| C | -3.4056930698 | -4.2127903146 | -5.9425518242 |
| H | -0.5011368349 | 0.8499540184  | -5.3775451972 |
| C | -0.3161100251 | -0.0558612062 | -7.3336839692 |
| H | -3.8612086703 | -2.7499401742 | -2.3455404261 |
| C | -4.3373411139 | -4.3650771121 | -3.7041415158 |
| C | -4.1739294787 | -4.8882654526 | -4.9916539131 |
| H | -3.2816276505 | -4.6247395713 | -6.9408689568 |
| C | -0.6693743899 | -1.1319051459 | -8.1556819906 |
| H | -1.7580611424 | -2.9906582189 | -8.3173494788 |
| H | -4.9381122298 | -4.9027273290 | -2.9756221545 |
| H | -4.6492157264 | -5.8296235259 | -5.2543700694 |
| H | 0.3218286966  | 0.7331497888  | -7.7225187532 |
| H | -0.3030224235 | -1.1709964811 | -9.1780936122 |
| C | 3.8260794283  | -1.1015914422 | 6.9862620992  |
| C | 5.8784366737  | 1.0125617992  | 5.4942123600  |
| H | 0.3556760909  | -0.9358340645 | 5.1932920158  |
| C | 1.5228621530  | -1.8439940532 | 6.7725603680  |
| C | 2.7651714917  | -1.9030091084 | 7.4138889050  |
| H | 4.7891441099  | -1.1525790511 | 7.4878976246  |
| H | 2.9061349861  | -2.5792597318 | 8.2528681621  |
| H | 0.7073875169  | -2.4740371686 | 7.1172064679  |
| C | 6.5143432057  | 1.9587190159  | 4.6873546390  |

|   |              |              |              |
|---|--------------|--------------|--------------|
| H | 6.4196284319 | 0.5275564457 | 6.3026382260 |
| H | 3.9493056423 | 2.7646655120 | 2.5790030676 |
| C | 5.8241774144 | 2.5858677812 | 3.6439455101 |
| H | 6.3332691774 | 3.3194691132 | 3.0247917941 |
| H | 7.5555269021 | 2.2099694525 | 4.8714121012 |

**Table S6.** Results of TD-DFT calculation for **9** (TD-B3LYP/6-31G(d)//B3LYP/6-31G(d))

| $\lambda/\text{nm}$ | oscillator strength | transition               | amplitude |
|---------------------|---------------------|--------------------------|-----------|
| 532.00              | 1.0435              | LUMO $\leftarrow$ HOMO-2 | -0.14168  |
|                     |                     | LUMO $\leftarrow$ HOMO   | 0.58646   |
| 455.34              | 0.0001              | LUMO $\leftarrow$ HOMO-1 | 0.70195   |
| 444.47              | 0.1075              | LUMO $\leftarrow$ HOMO-2 | 0.68752   |

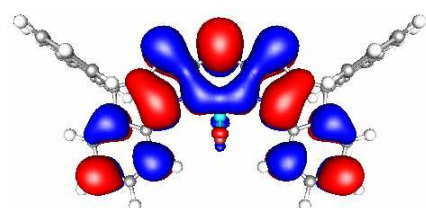

LUMO

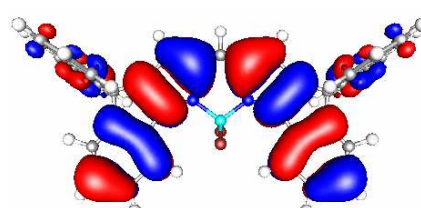

HOMO

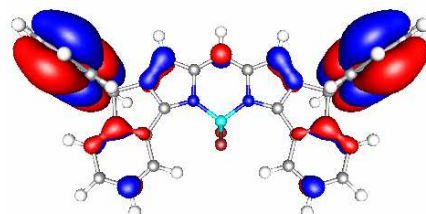

HOMO-1

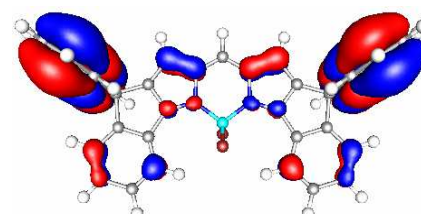

HOMO-2

**Figure S4.** Molecular orbital plots for model compound **9**.

# <sup>1</sup>H and <sup>13</sup>C NMR Spectra

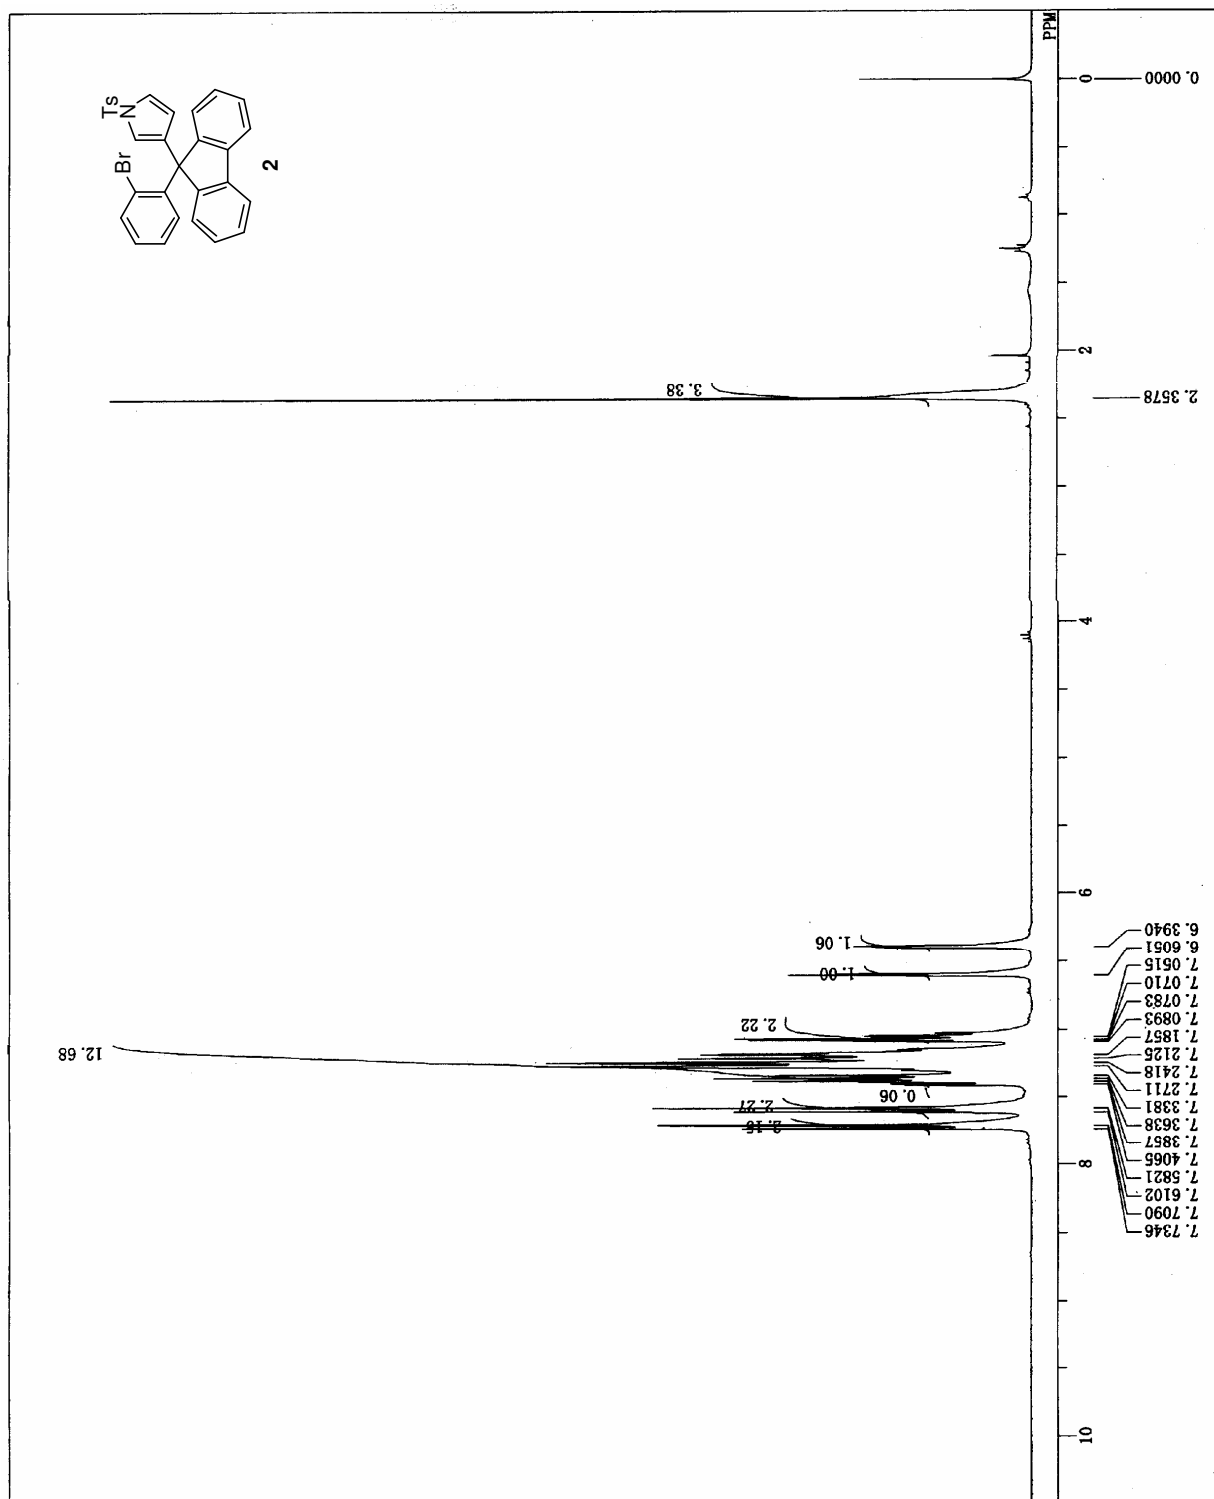

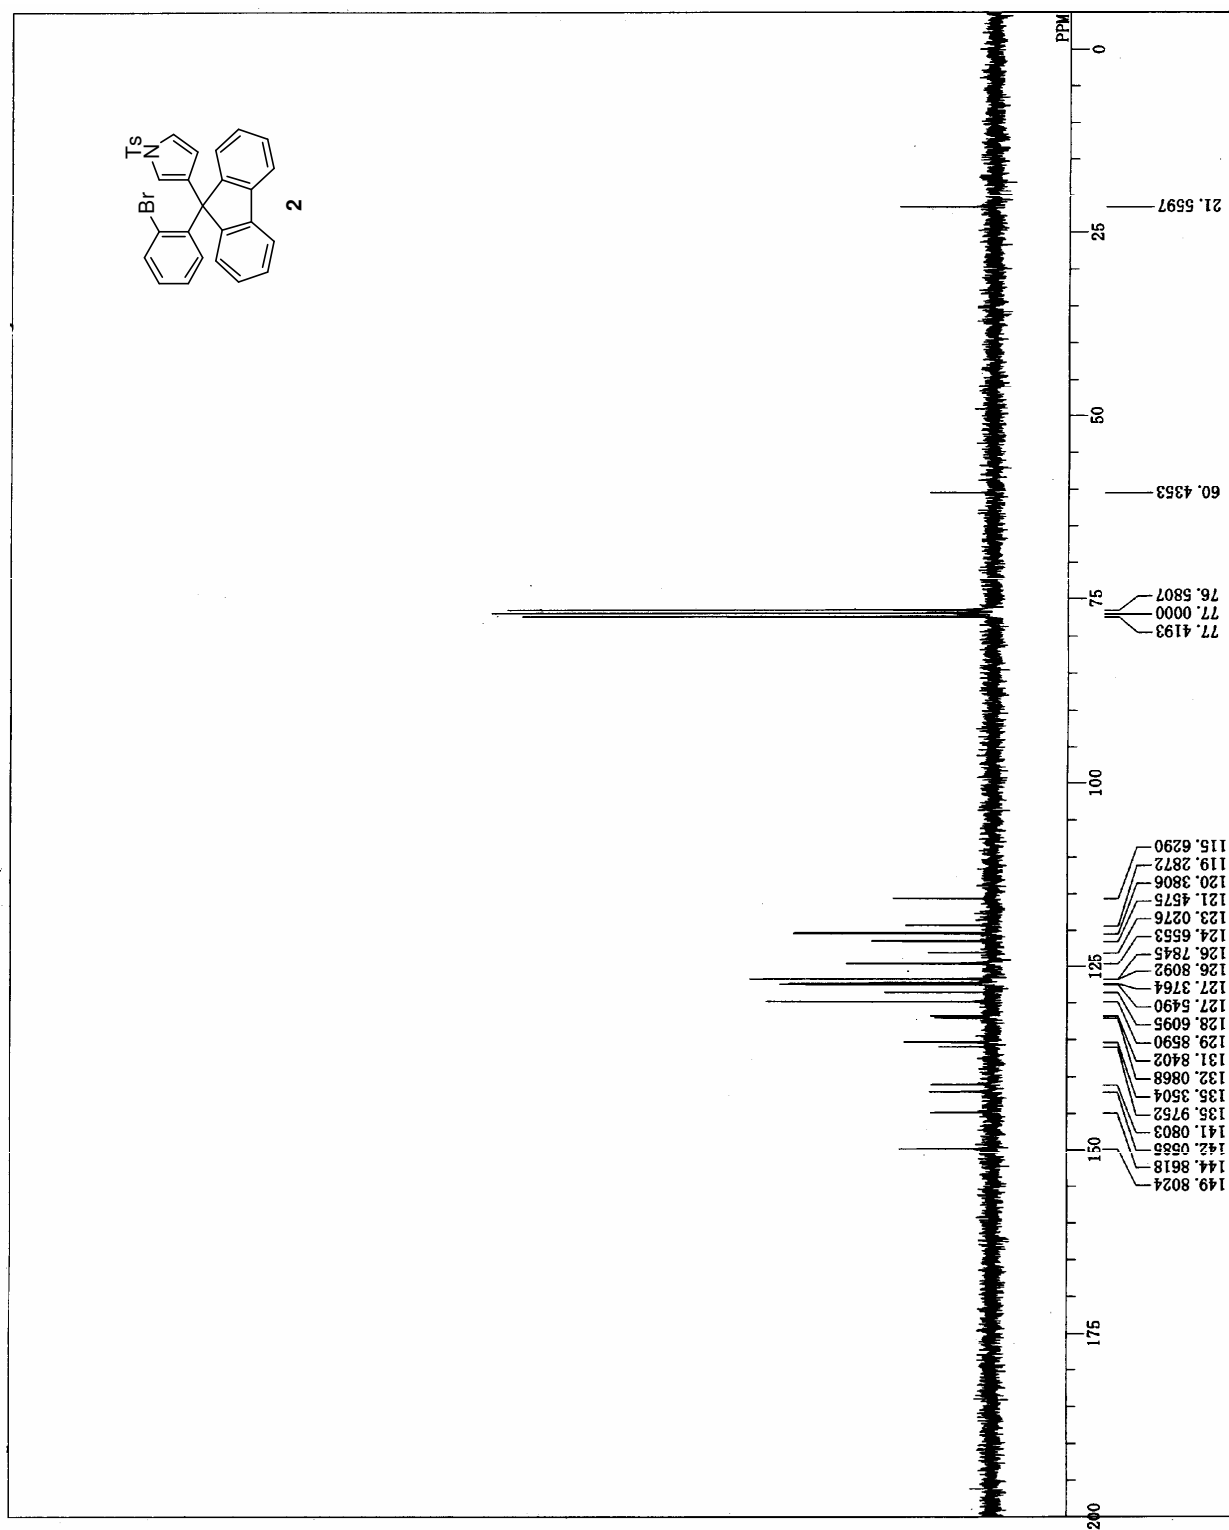

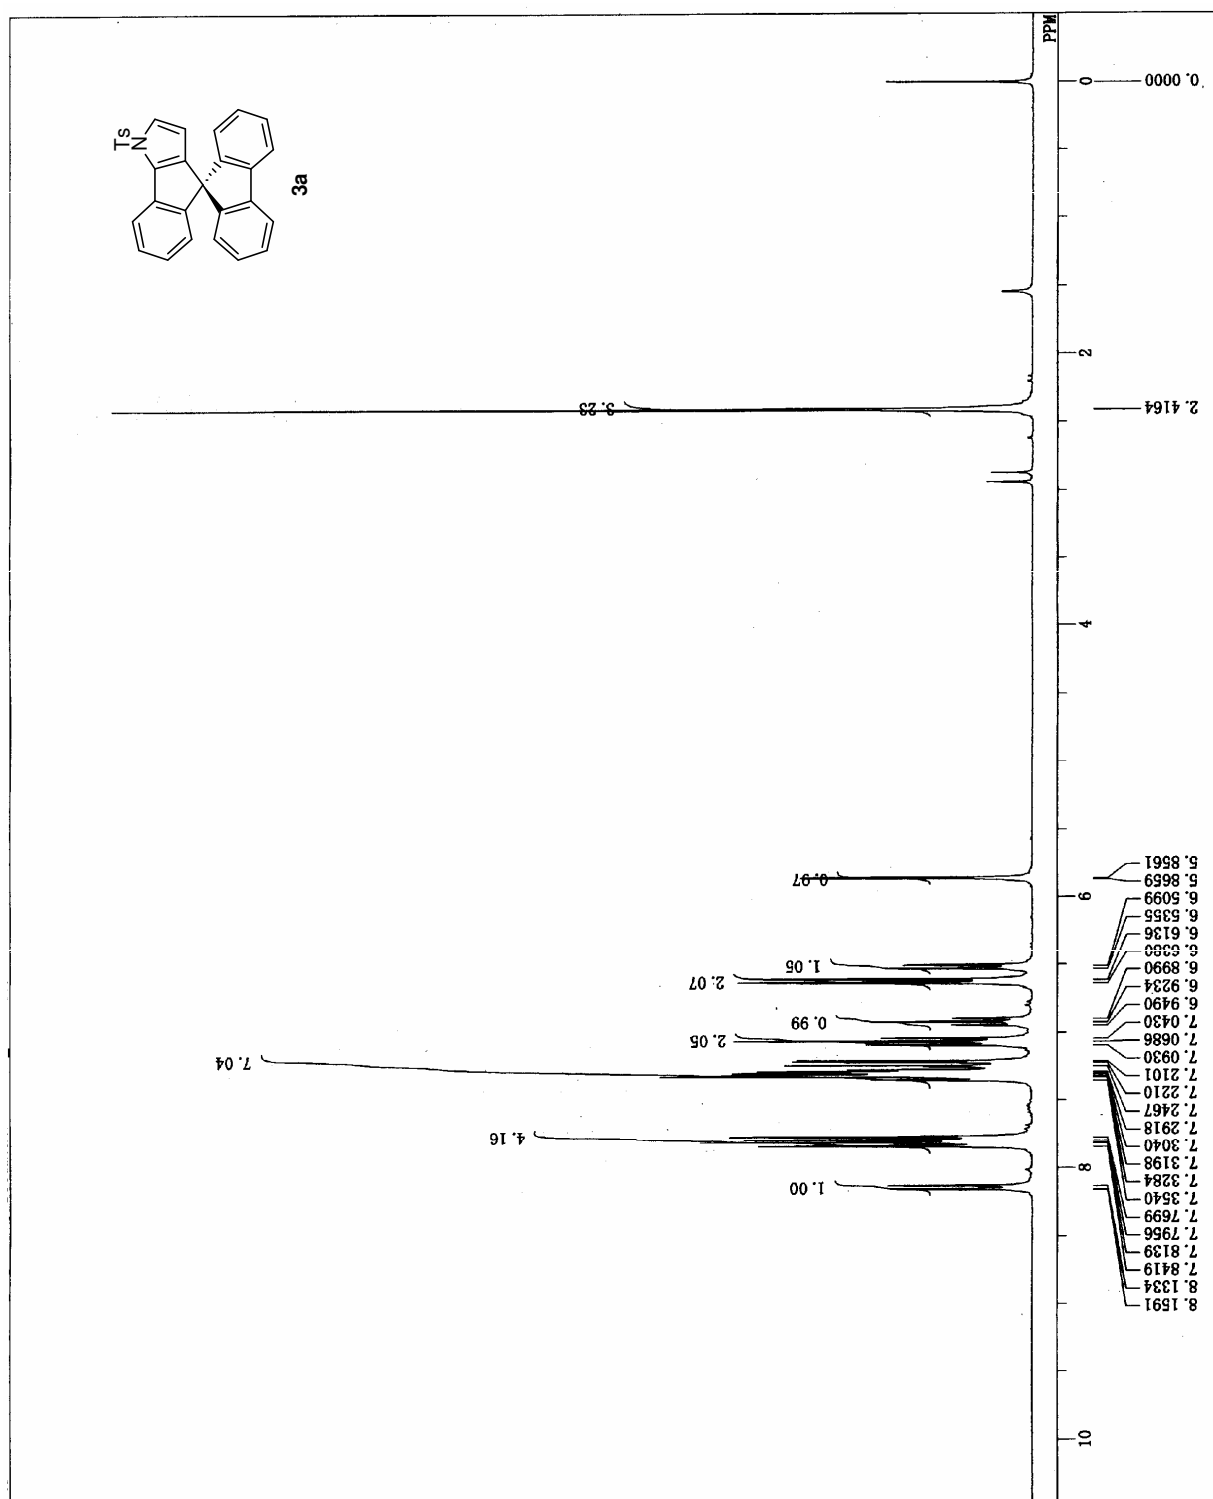



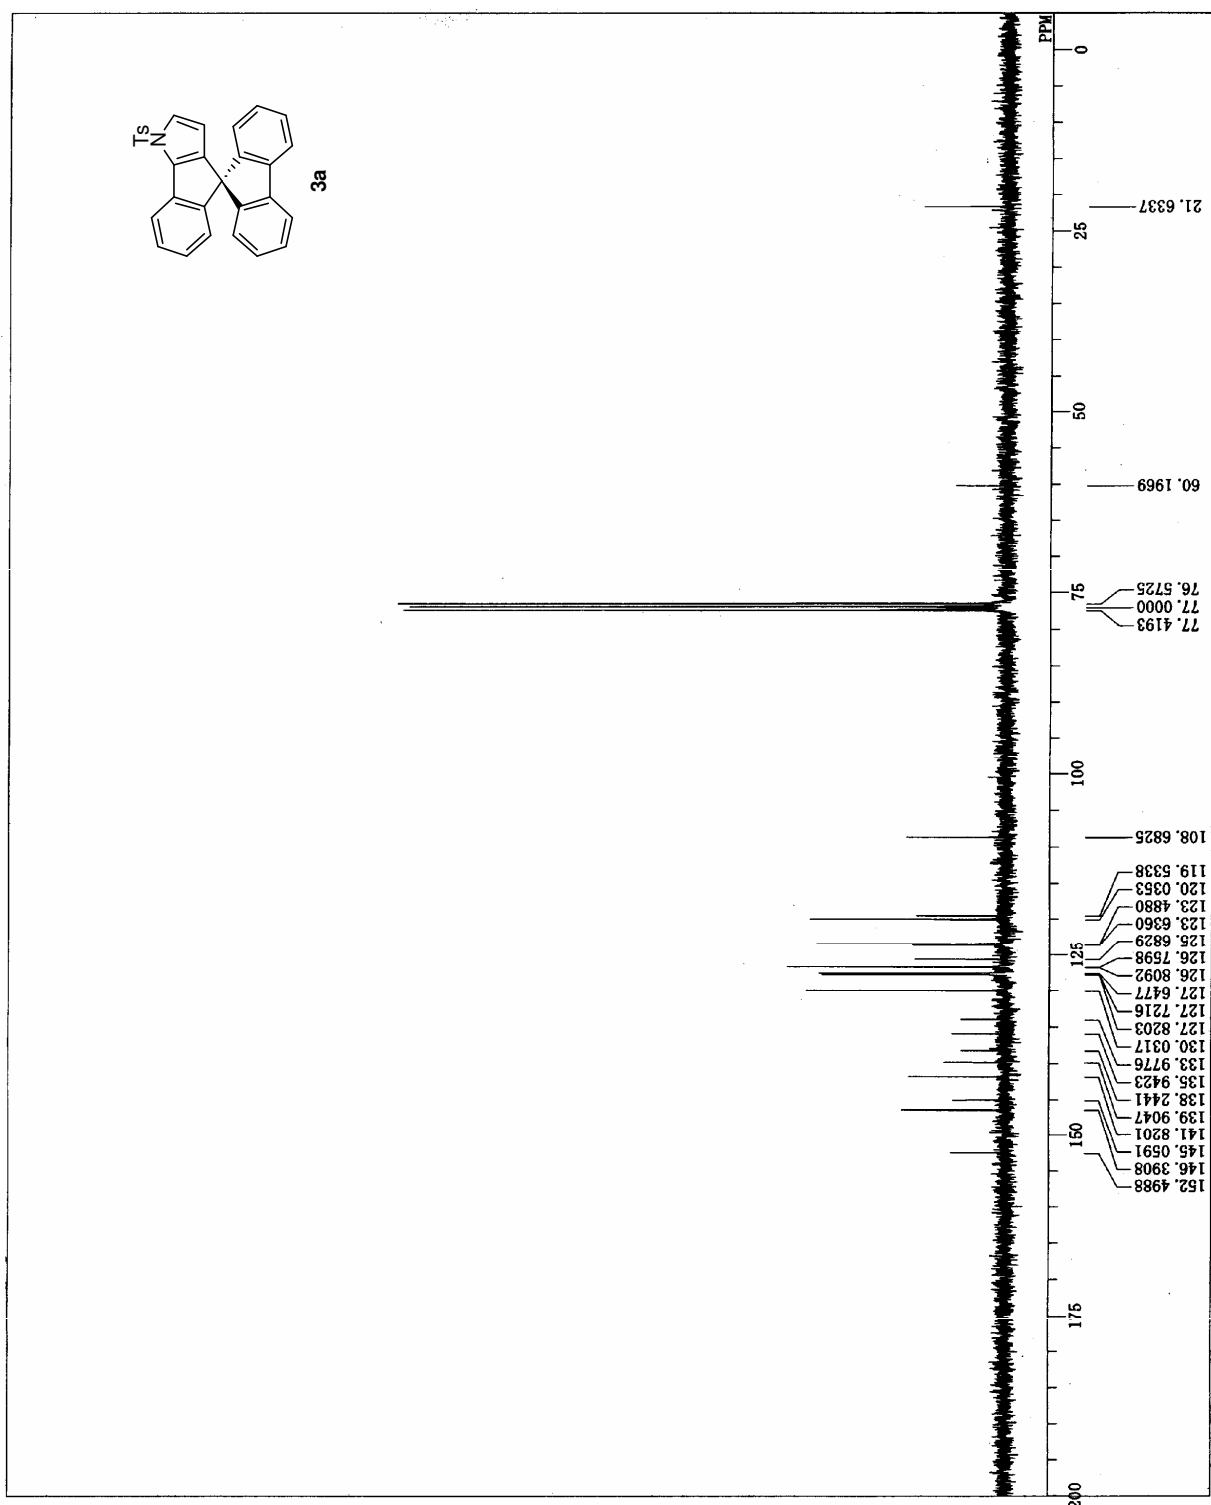

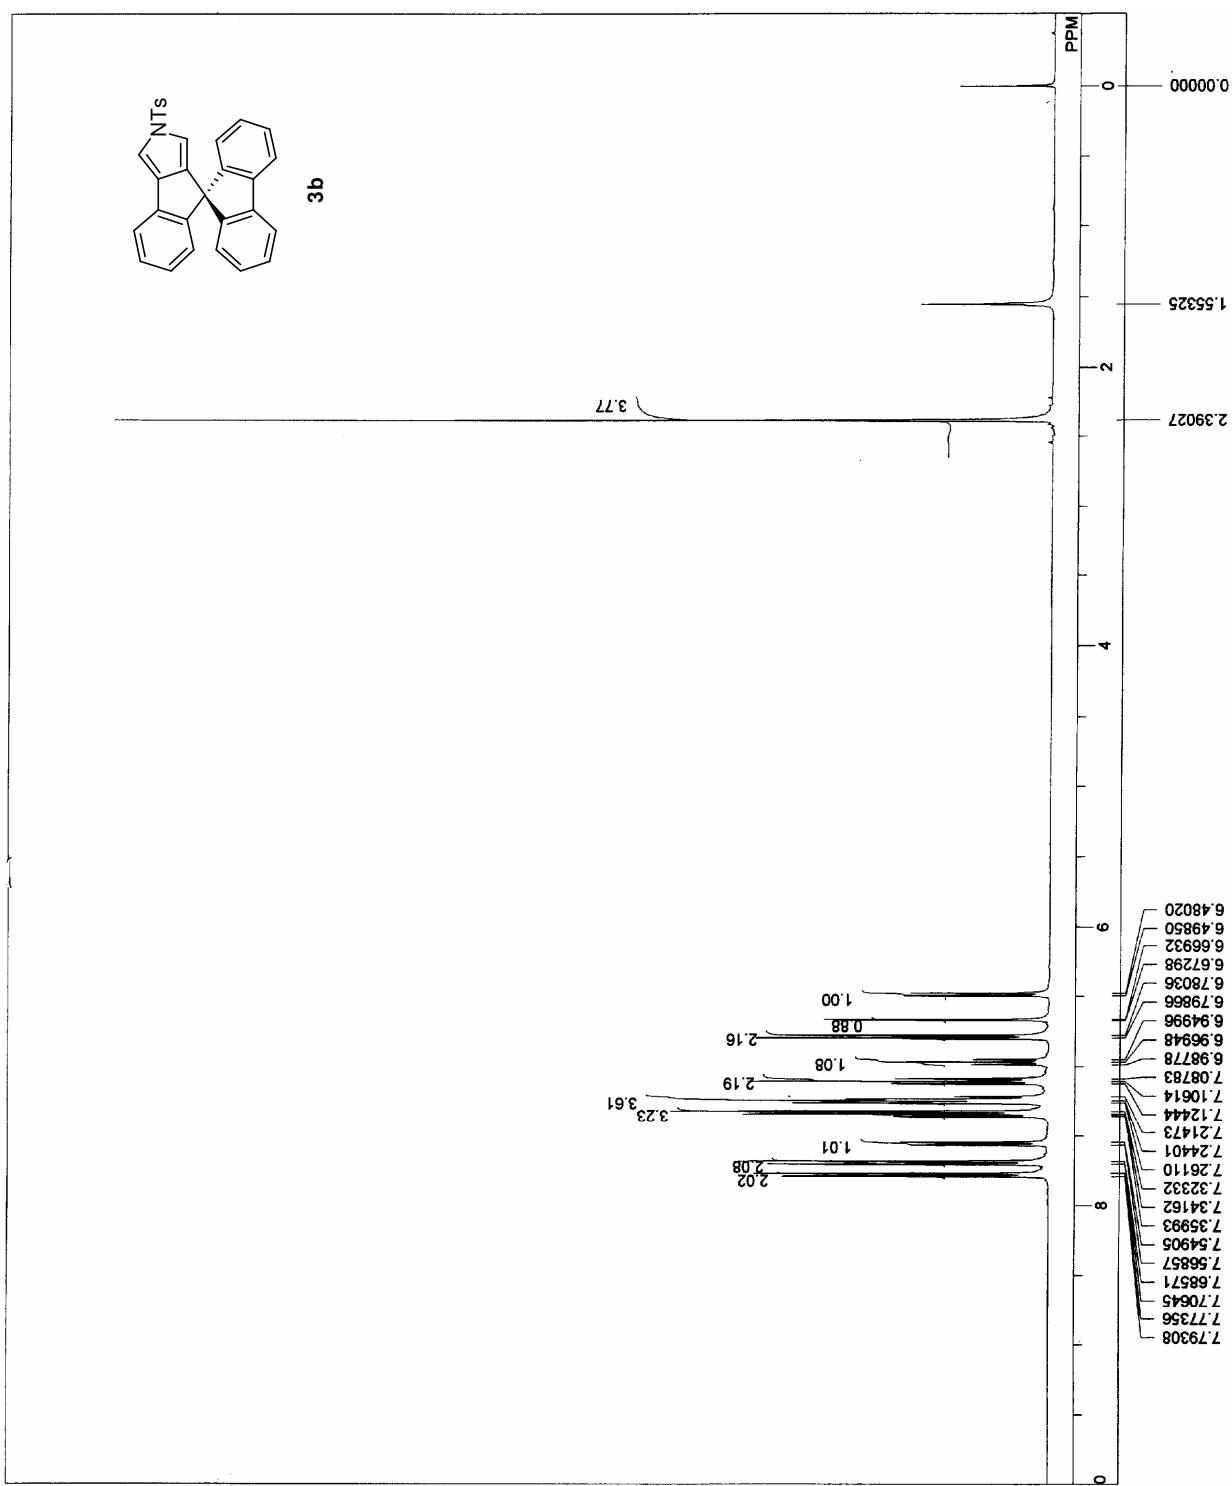

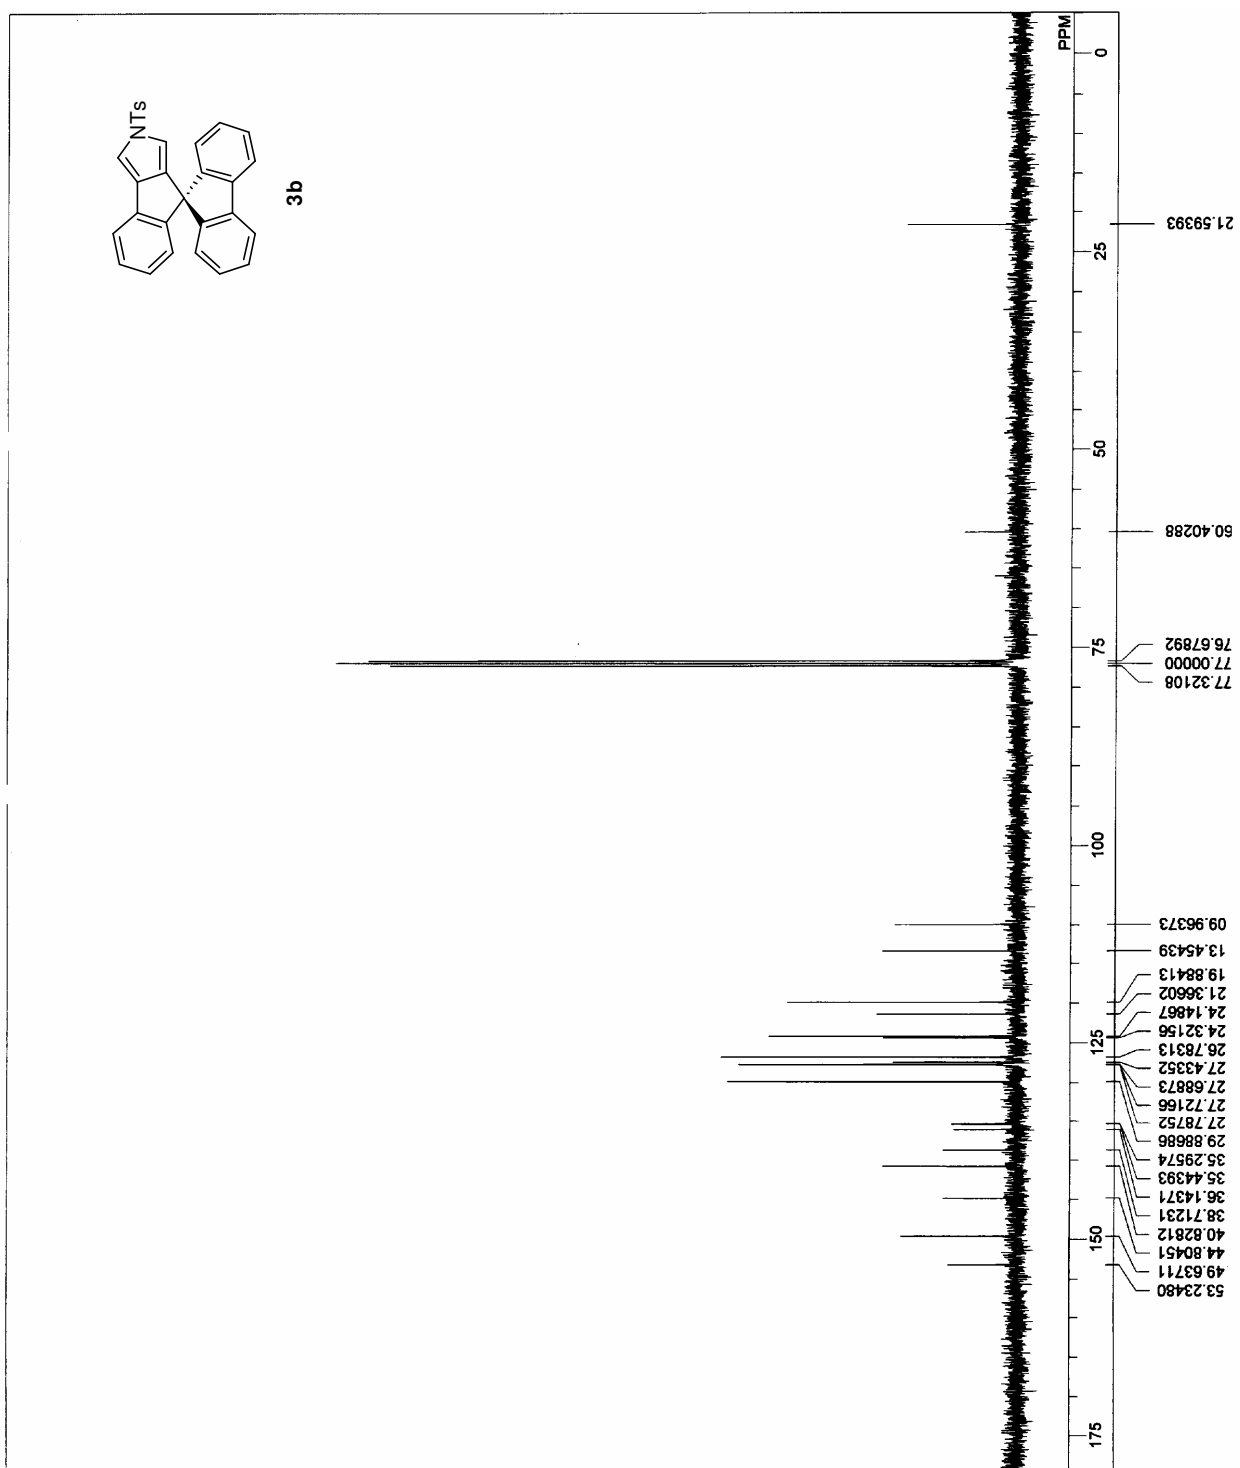

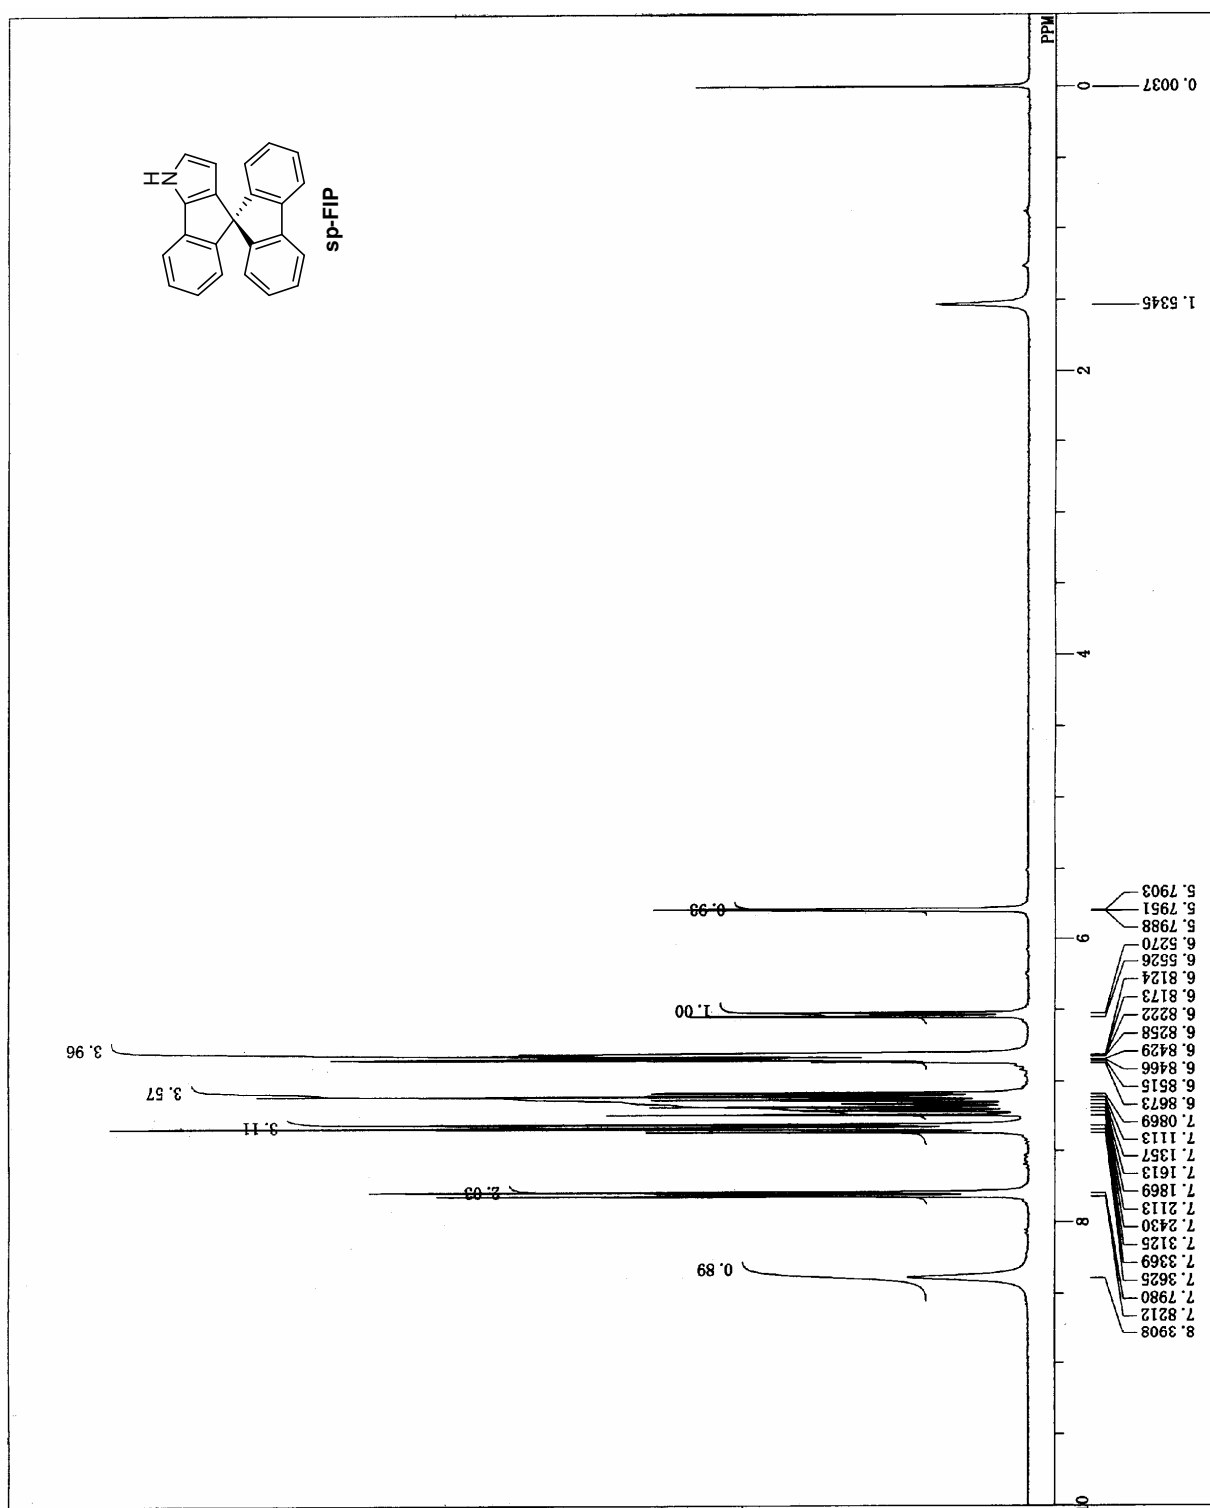

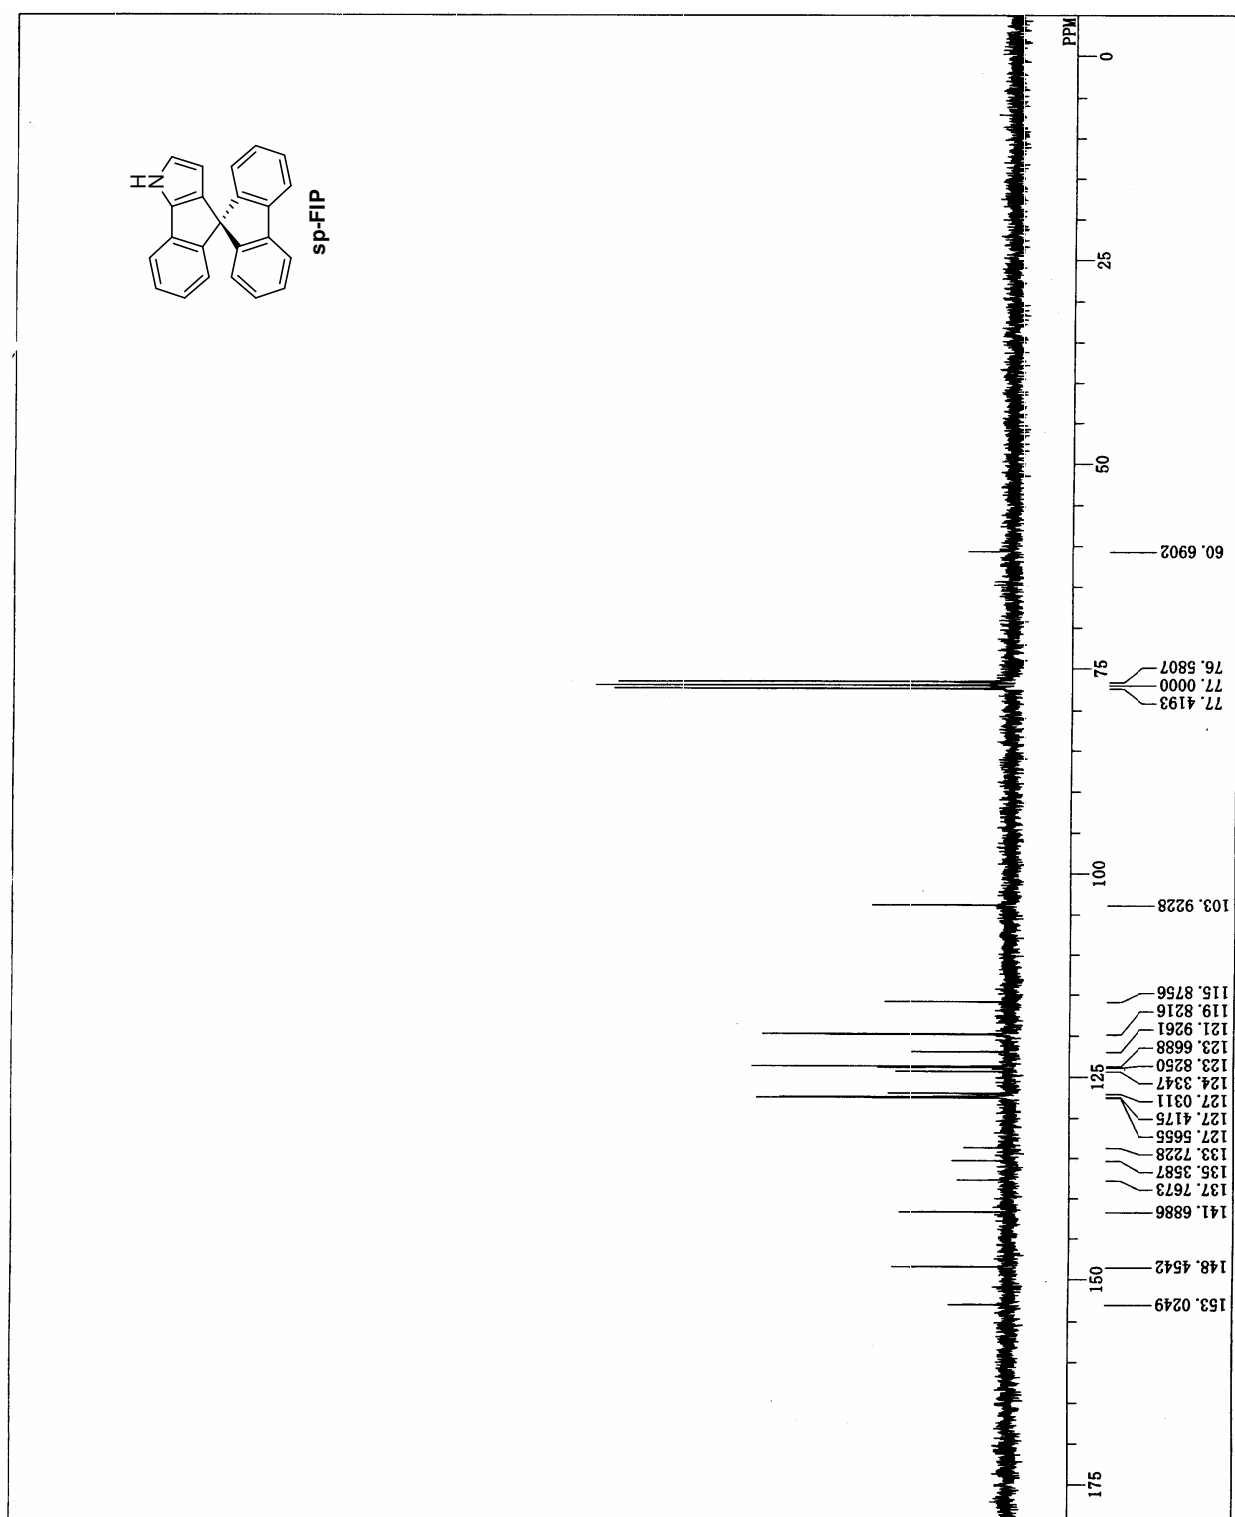



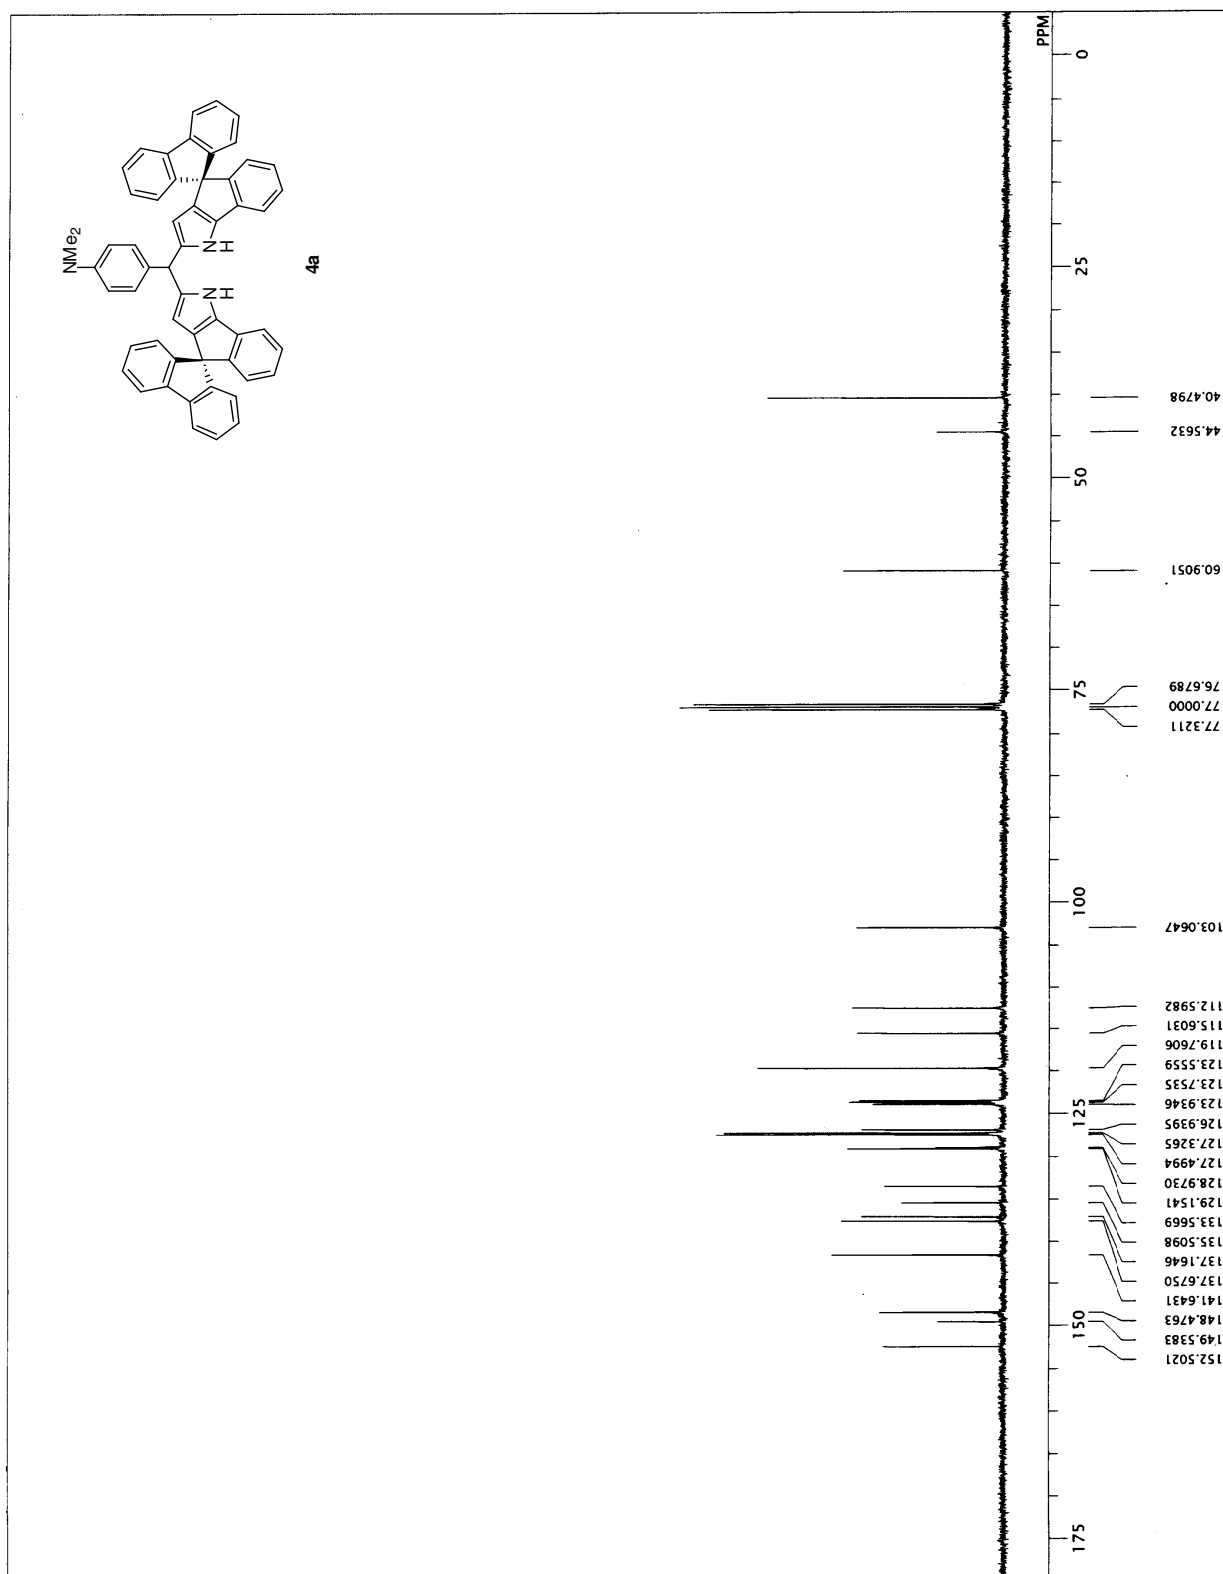

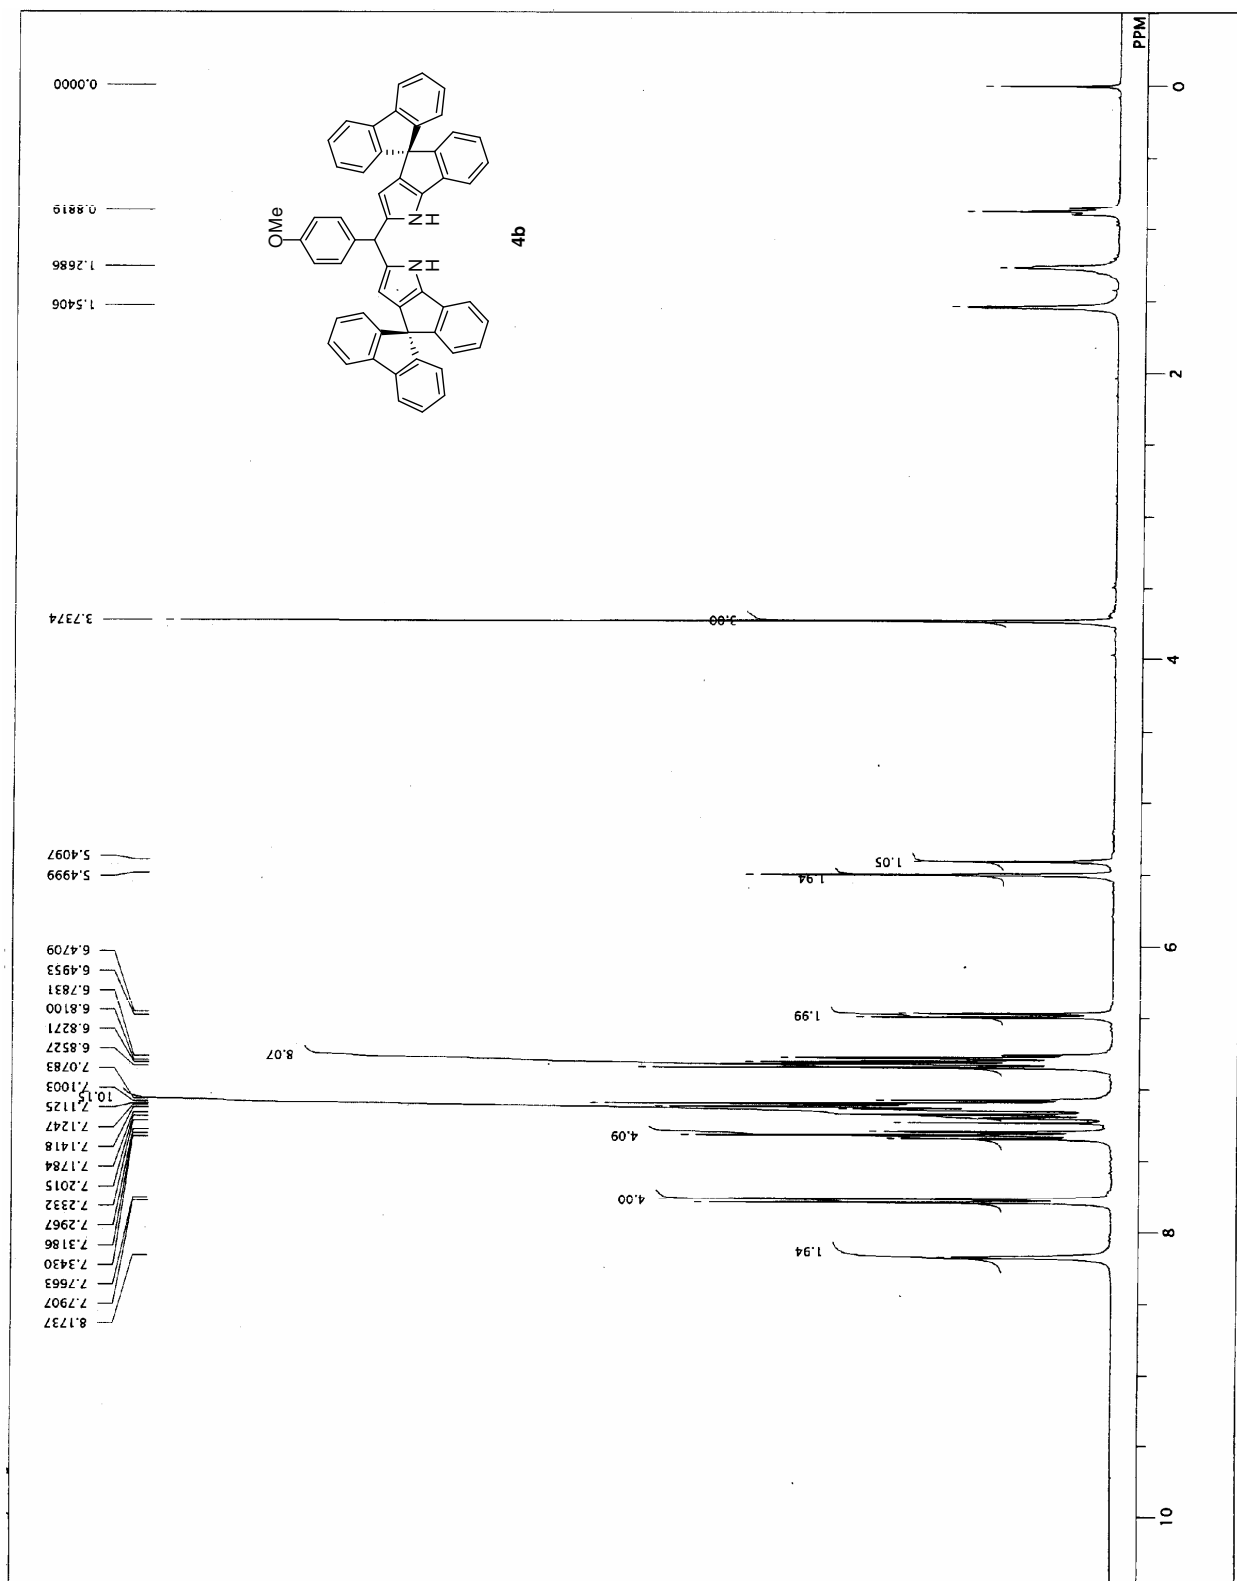



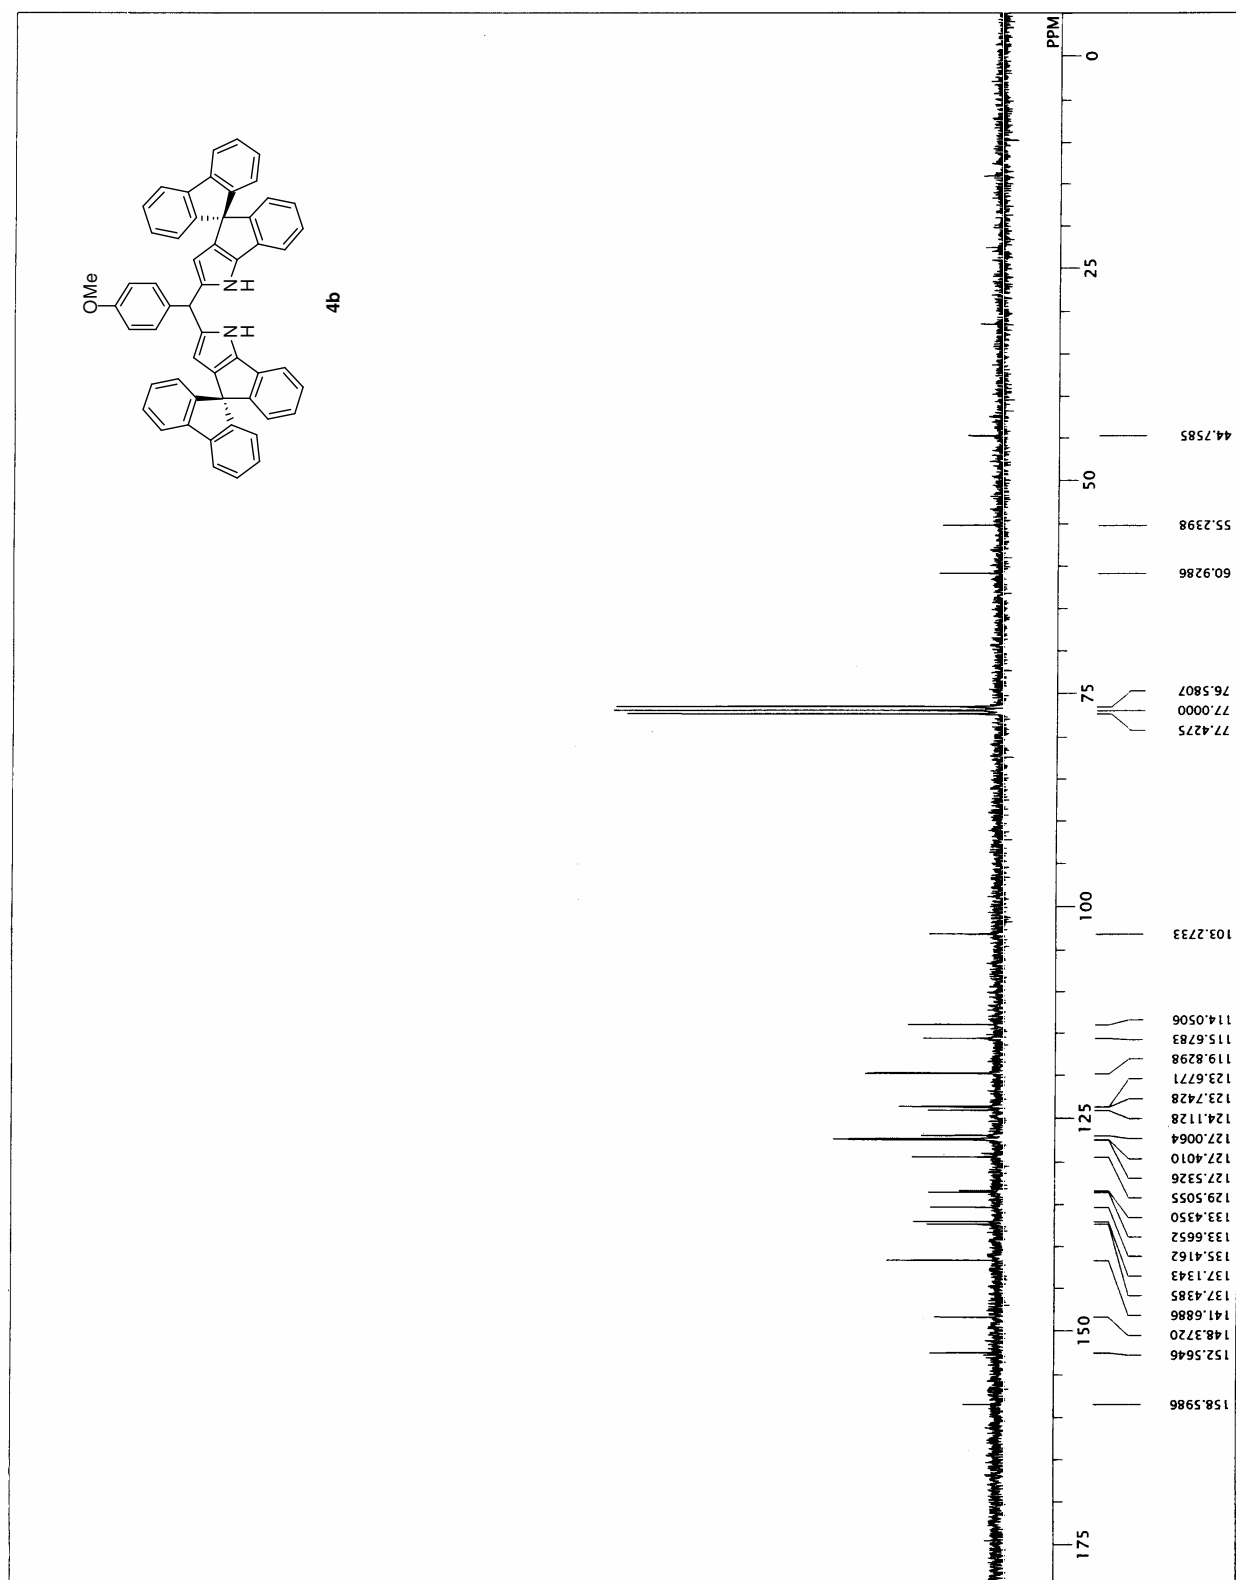

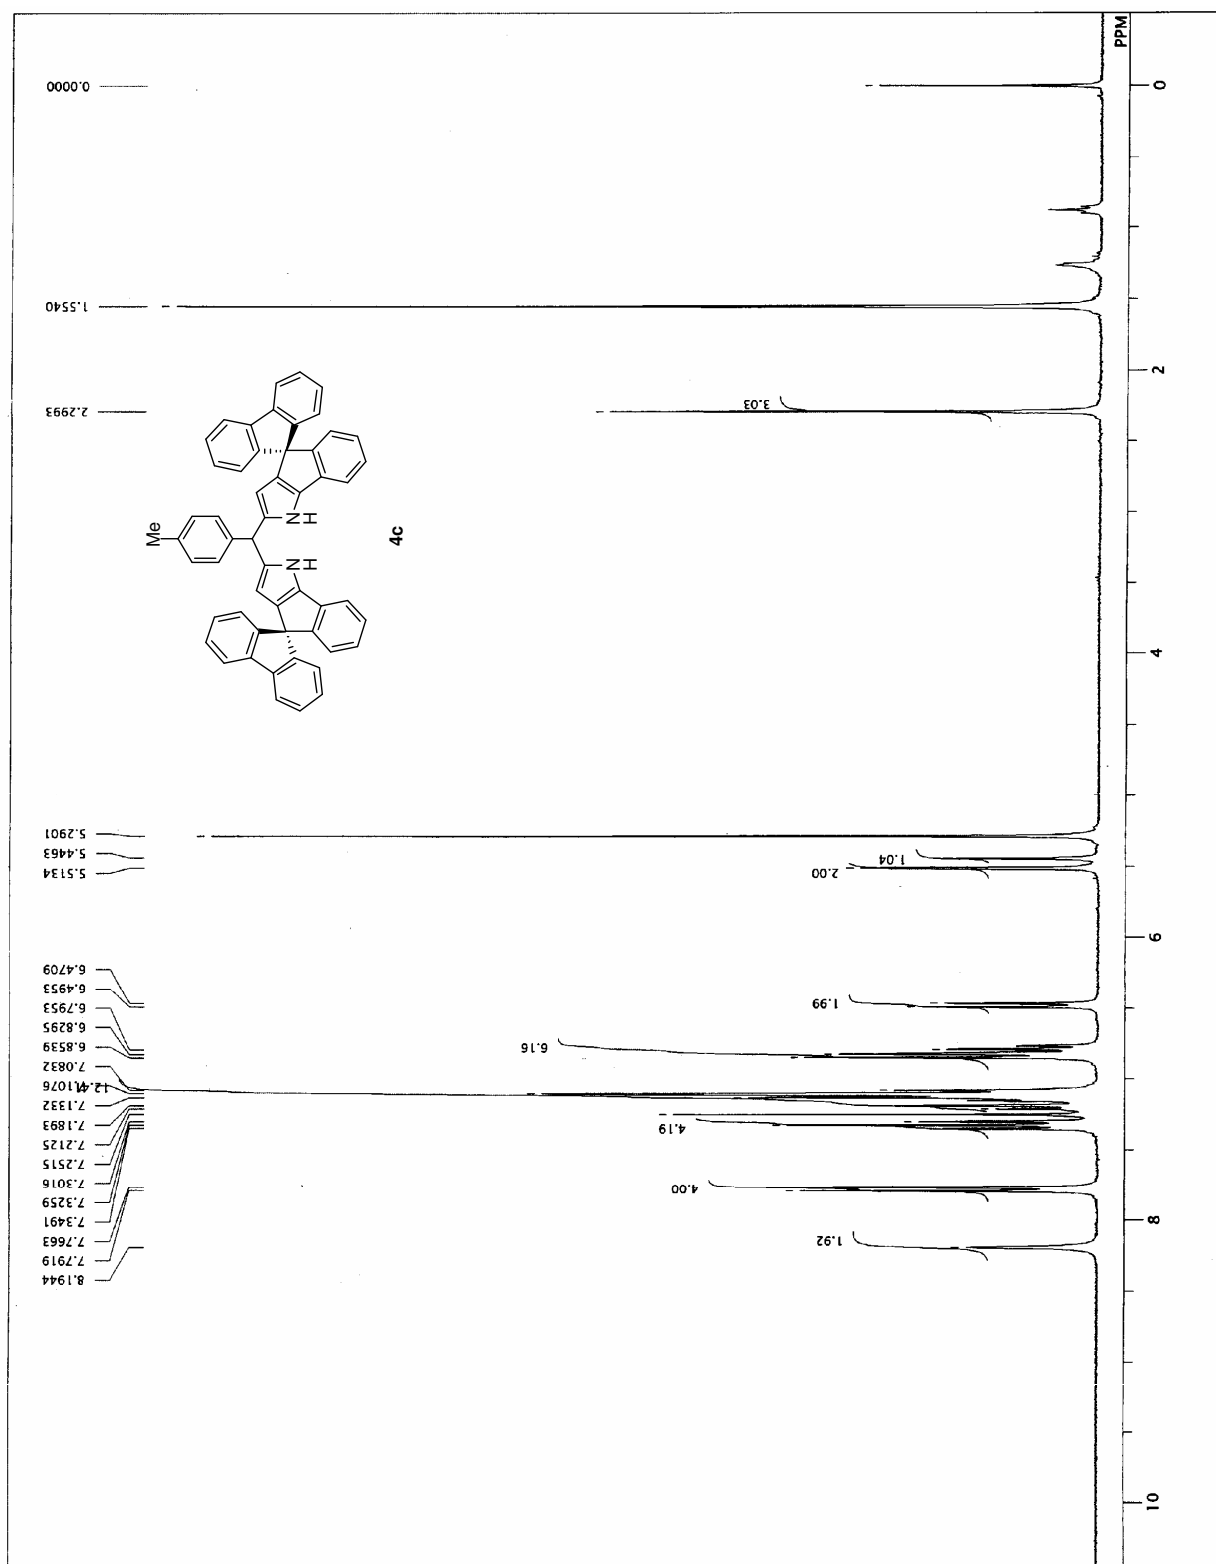

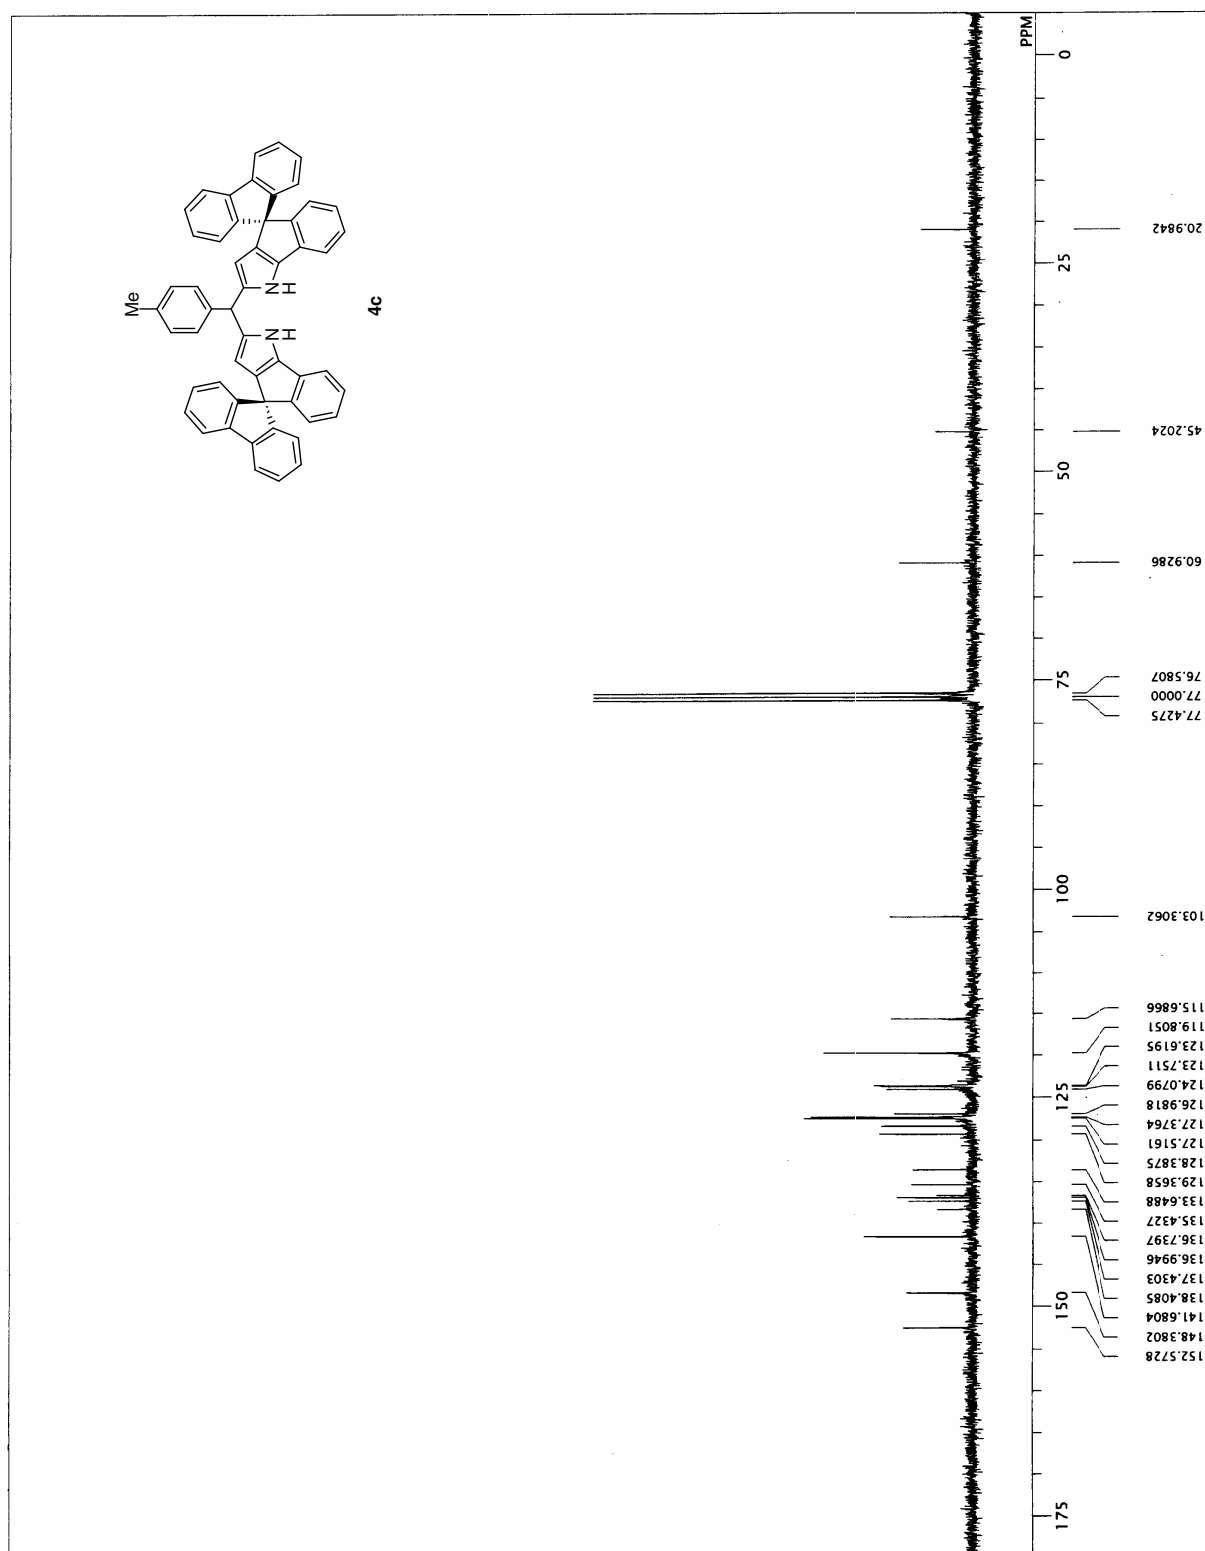

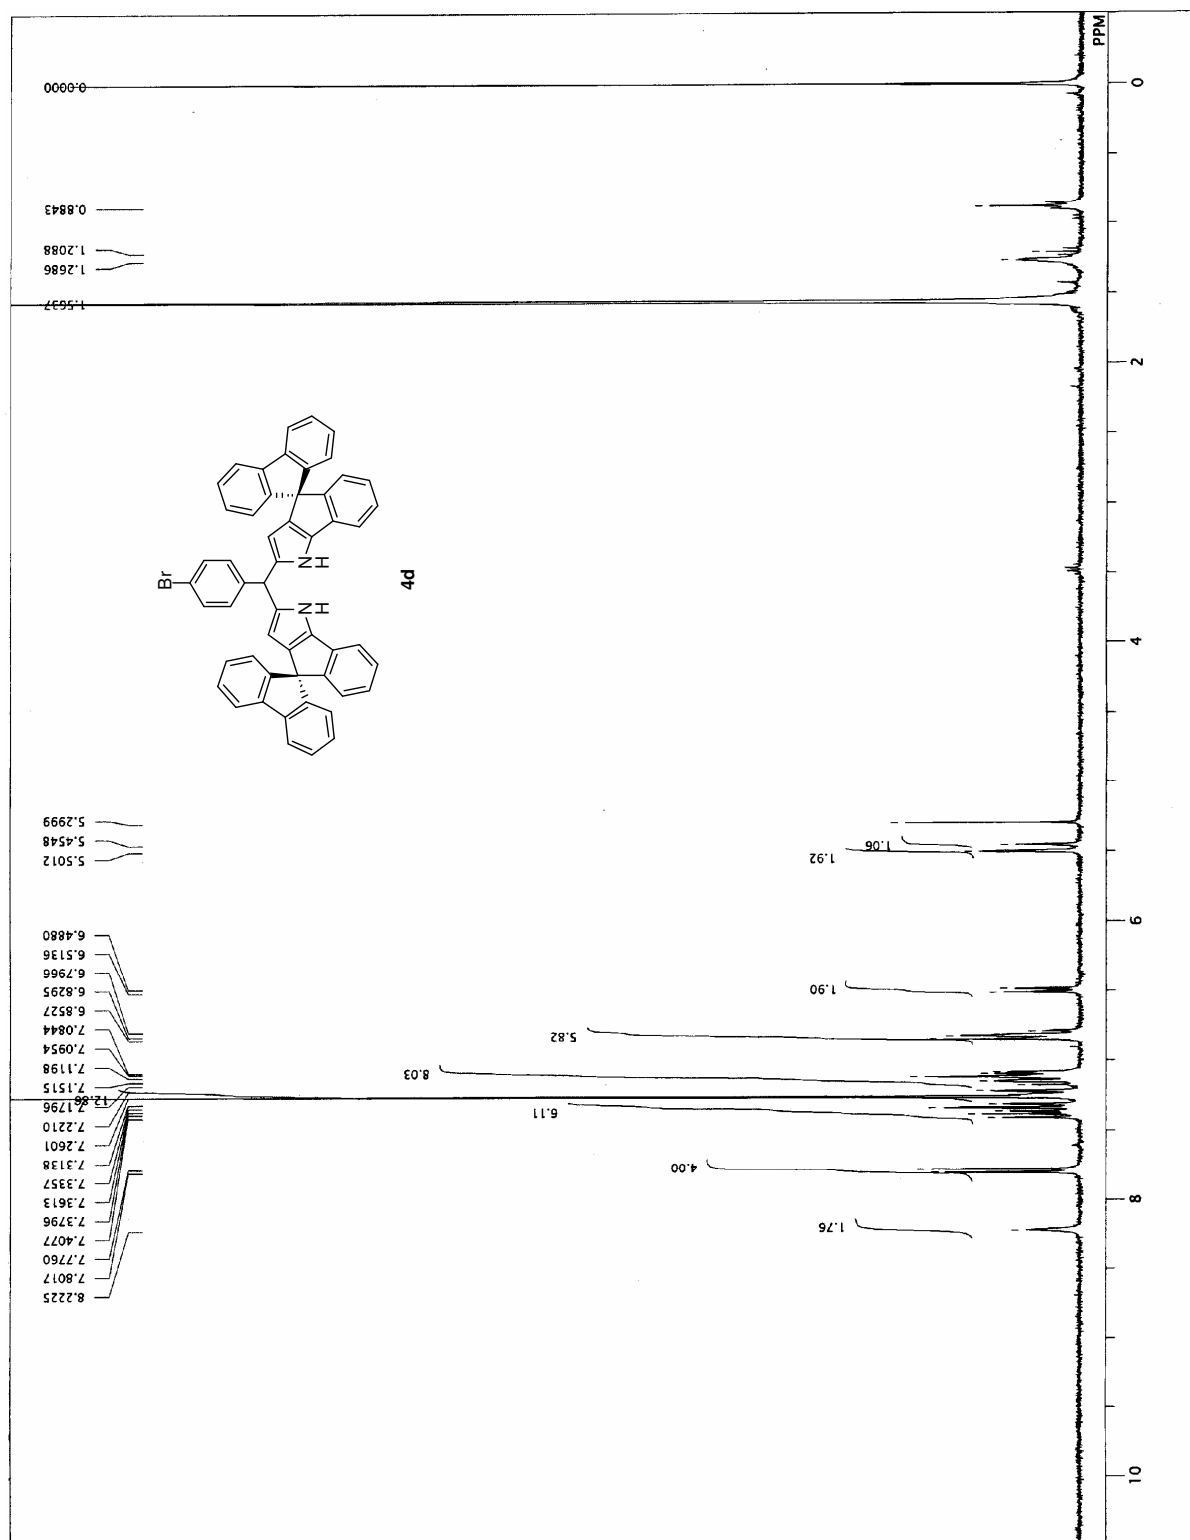

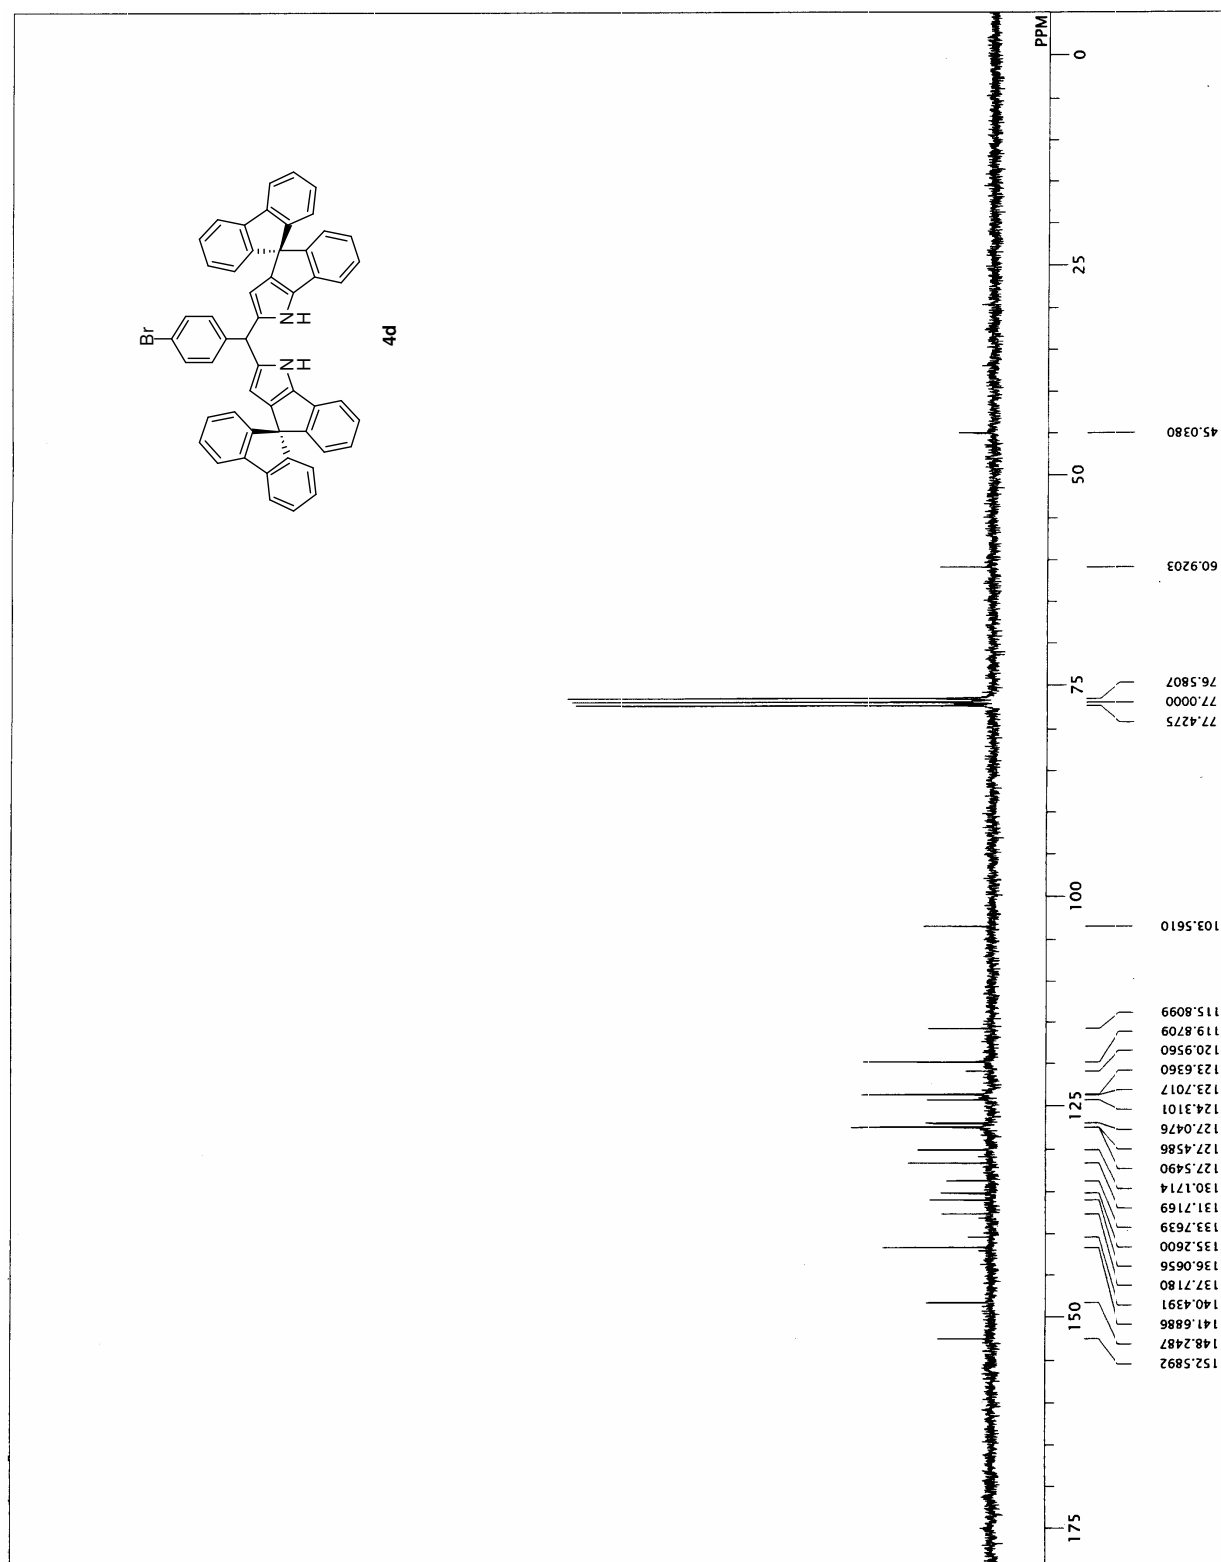

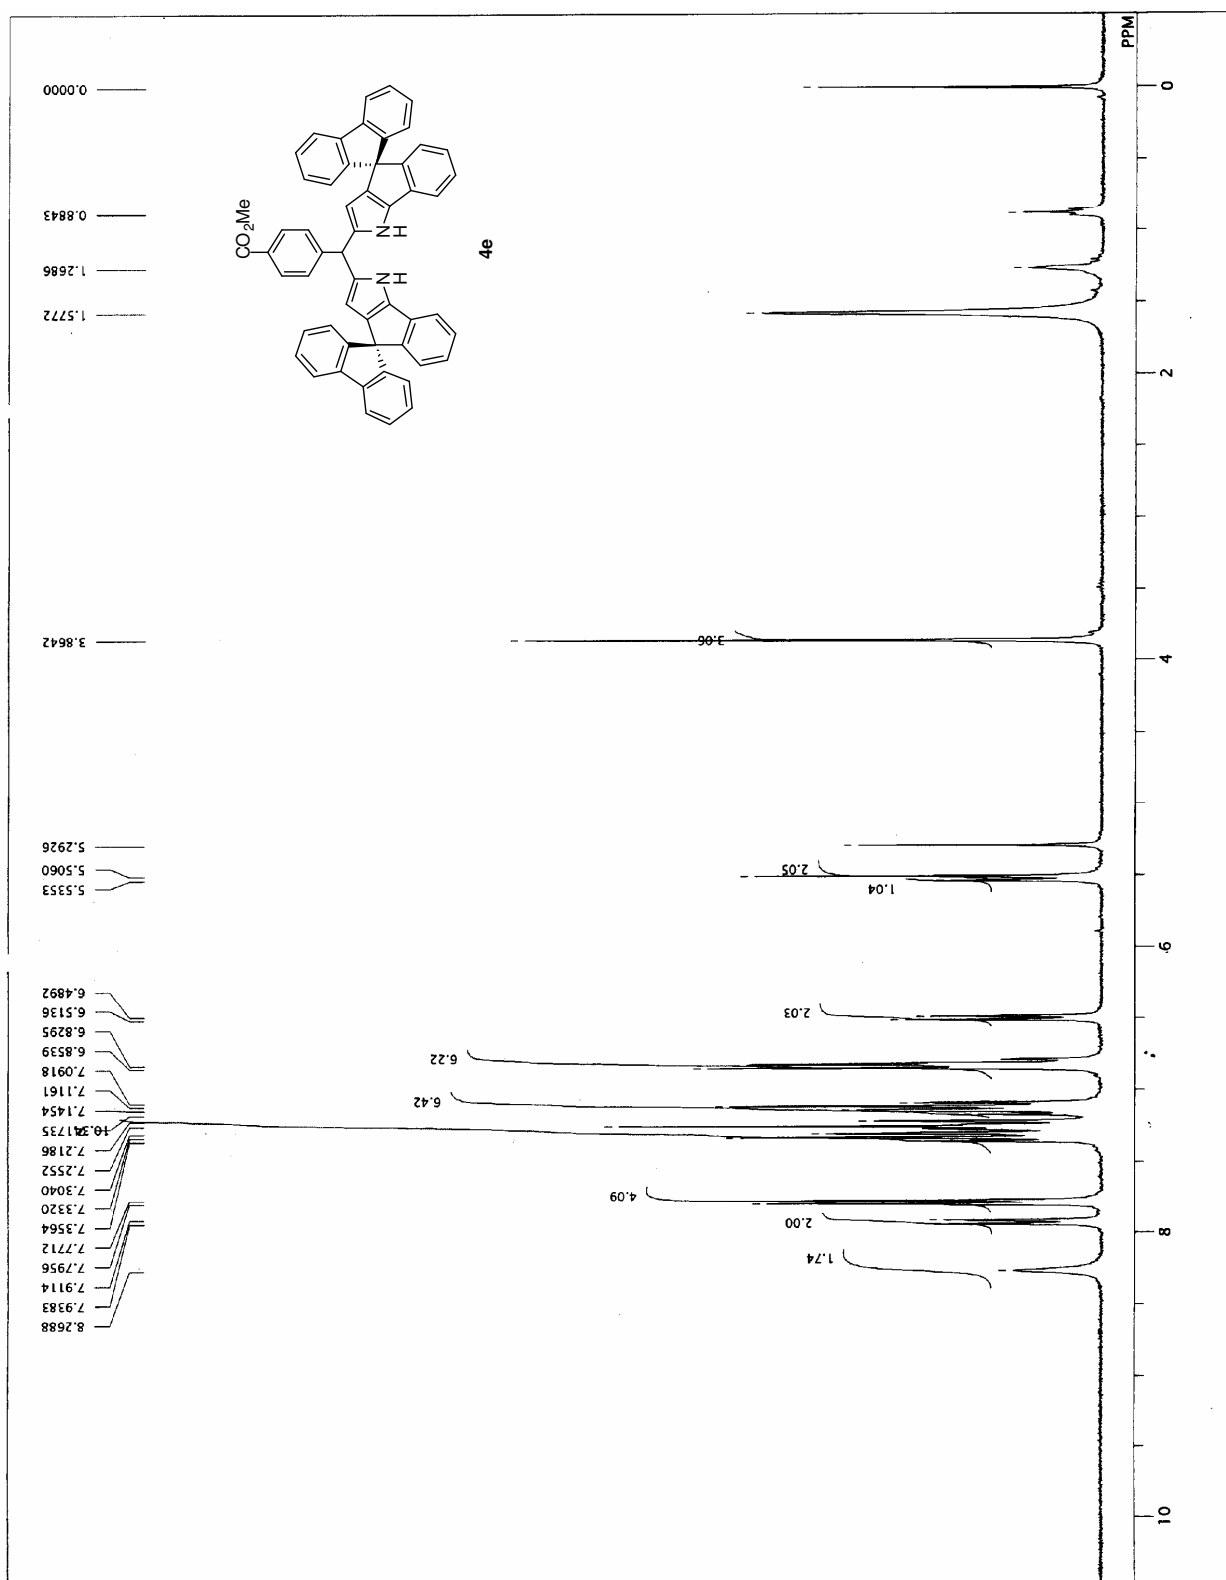

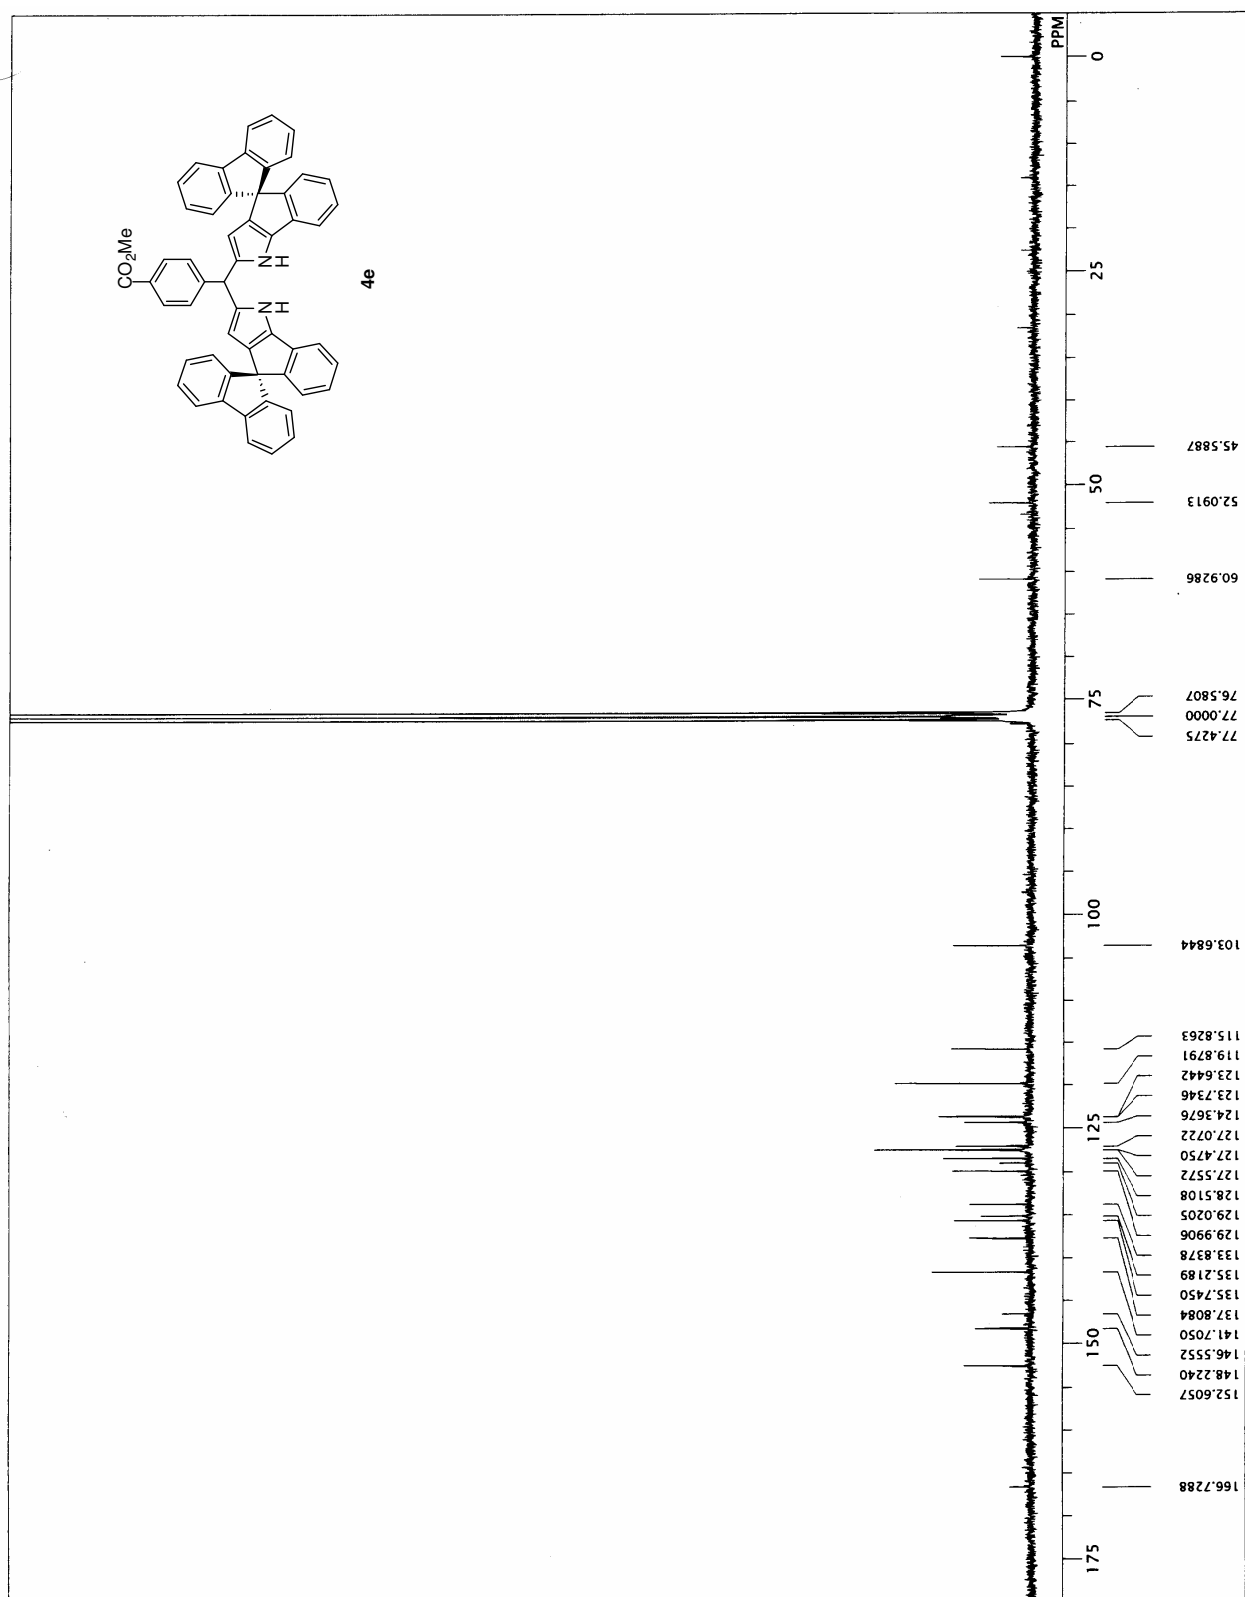





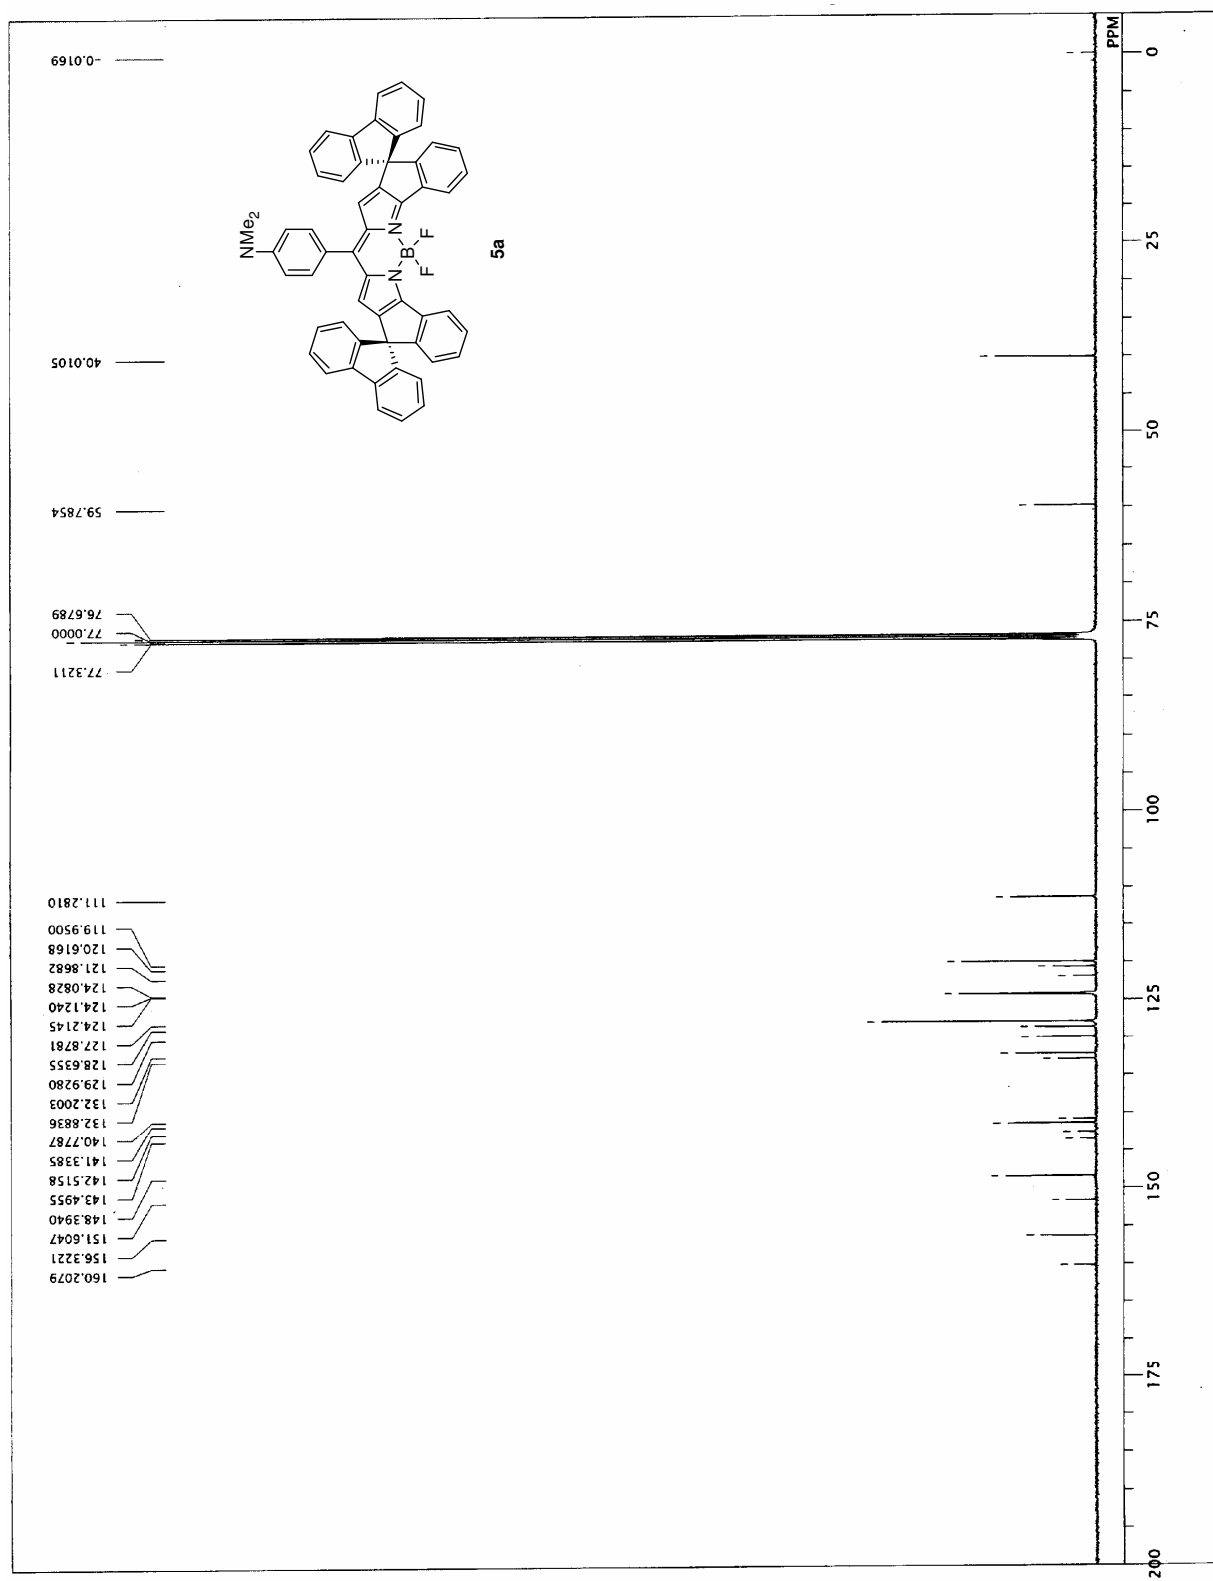

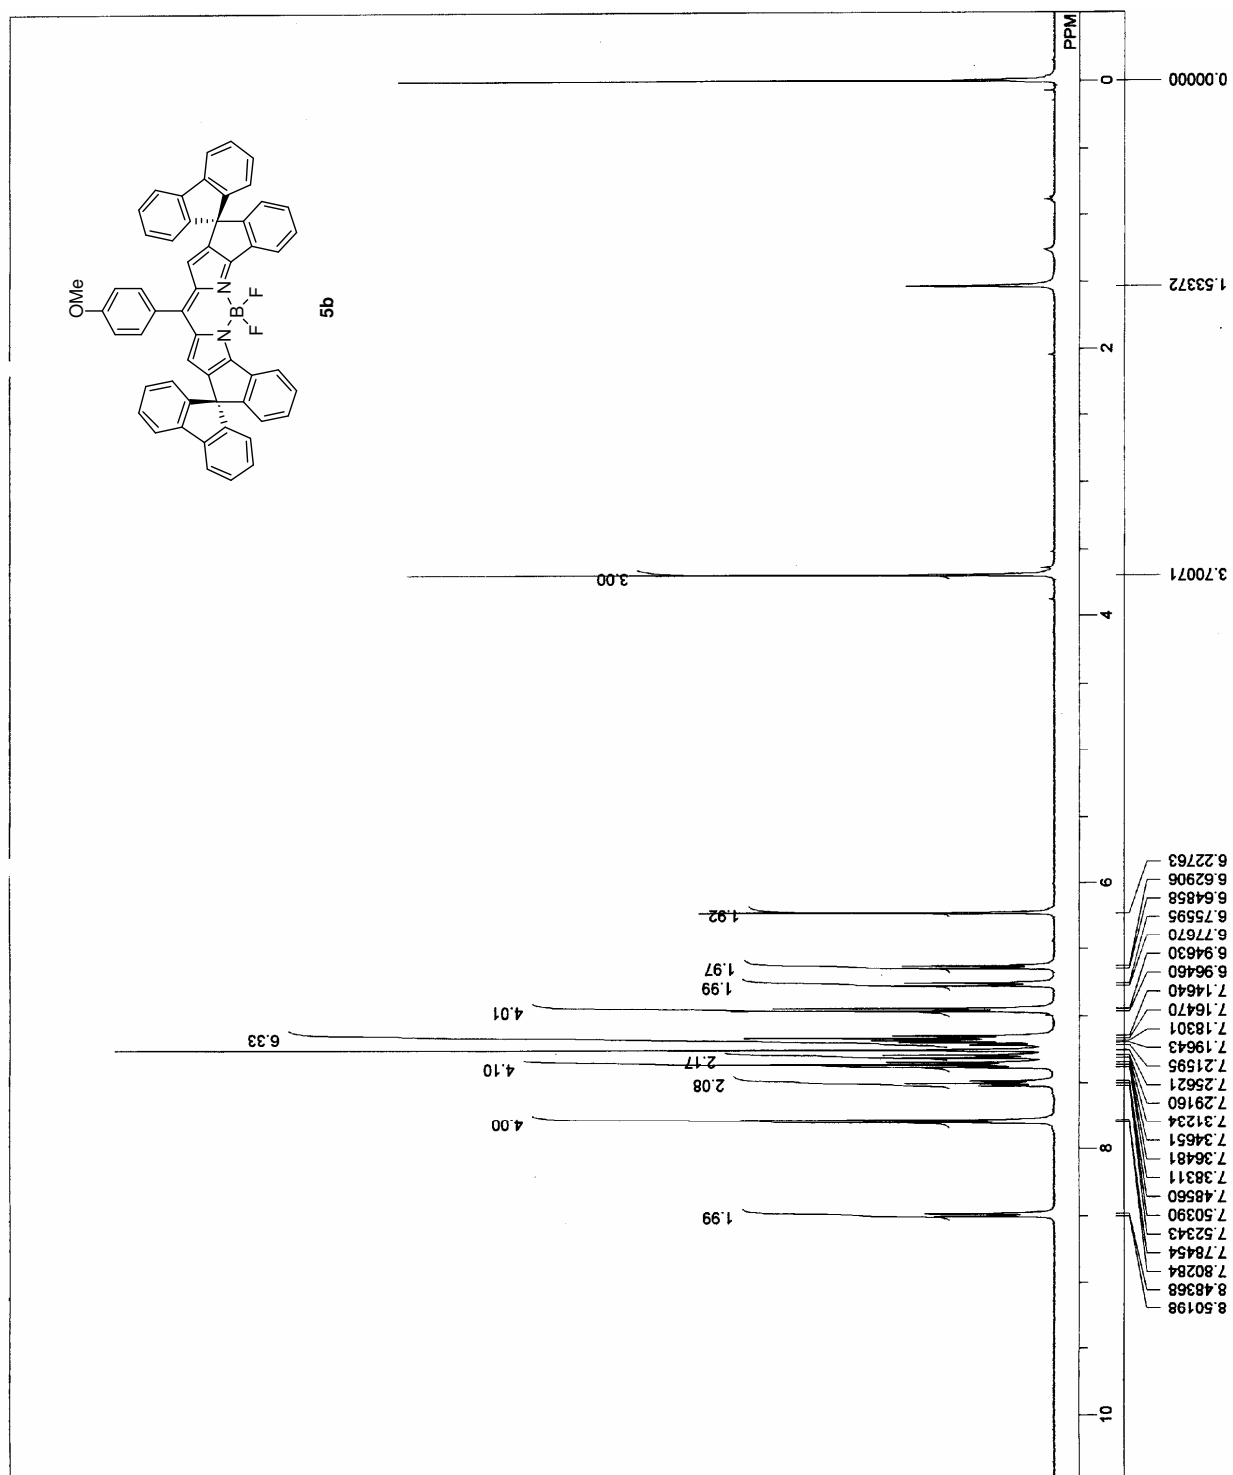

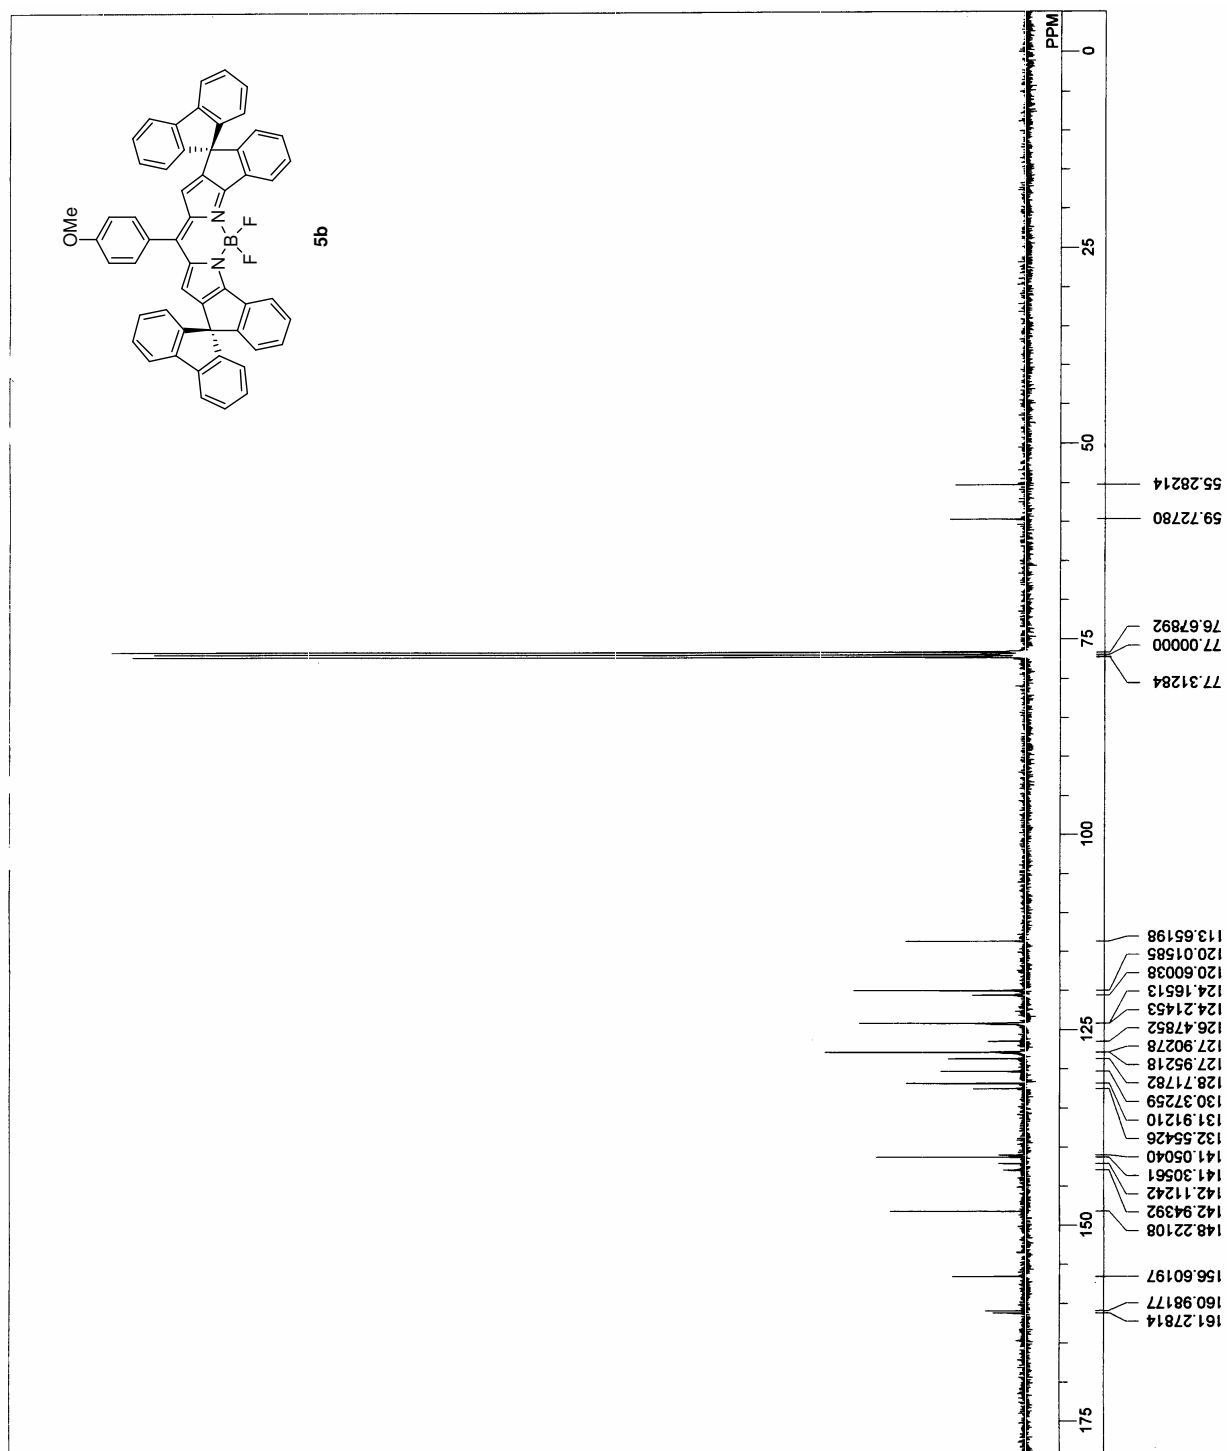

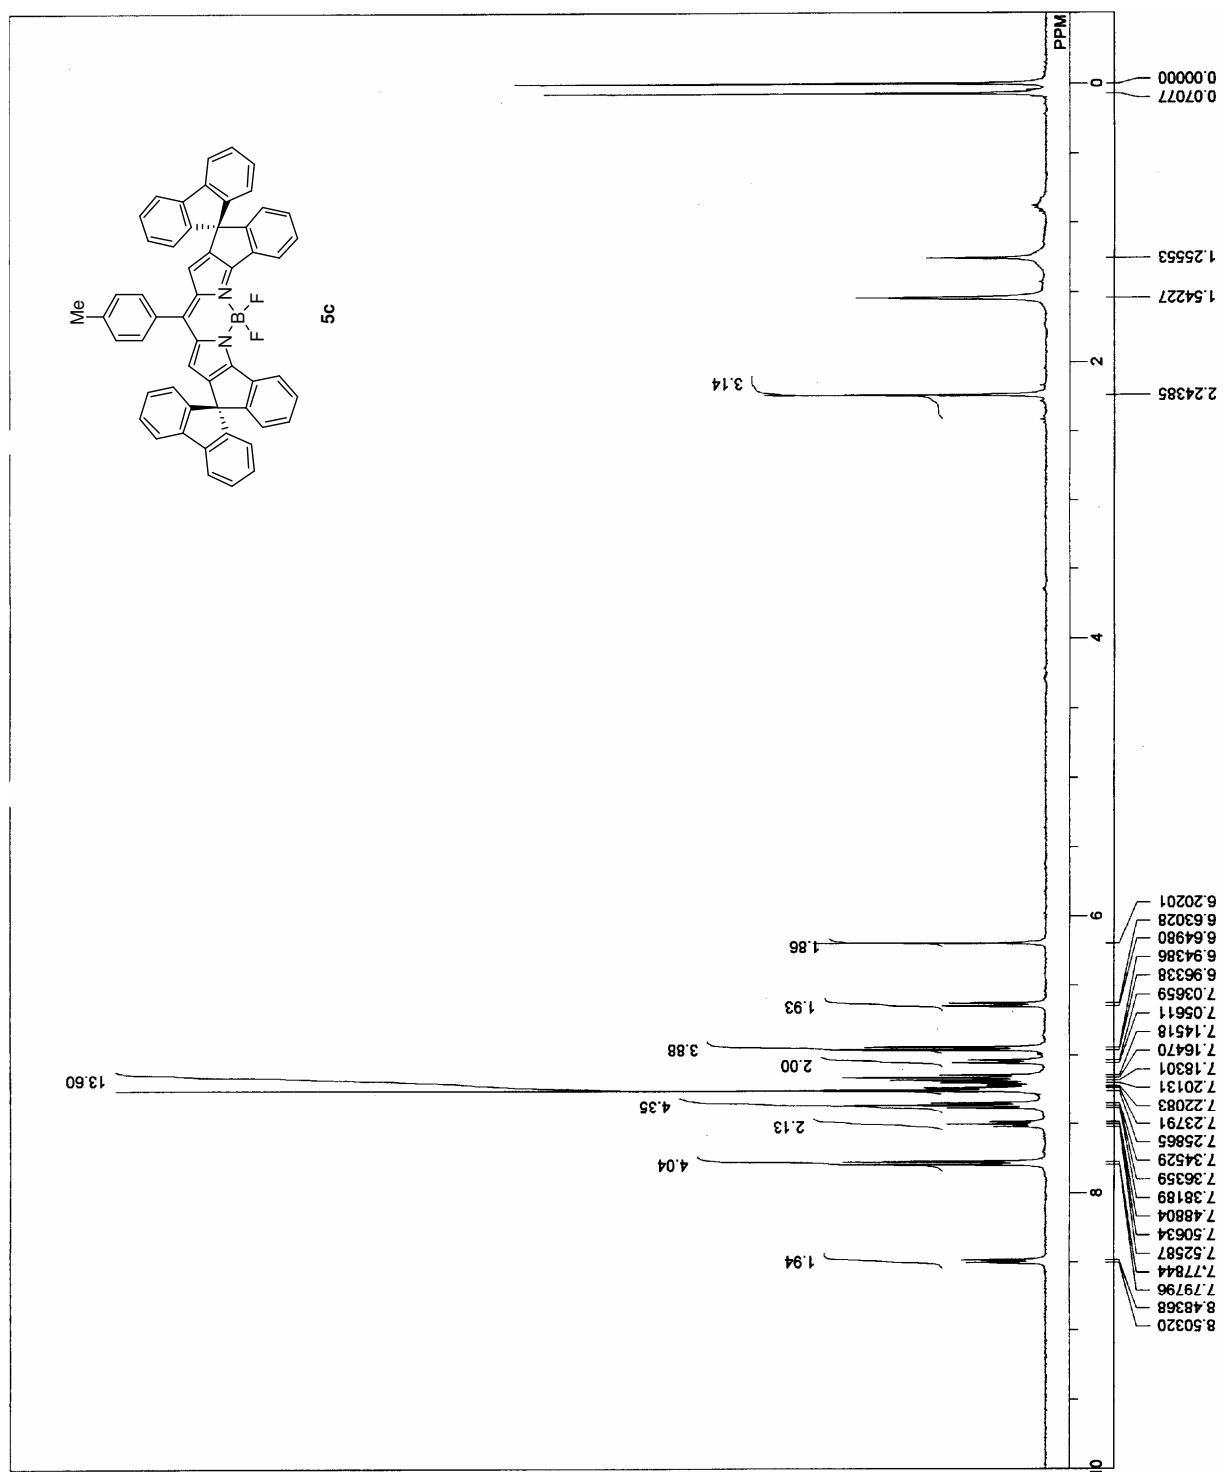

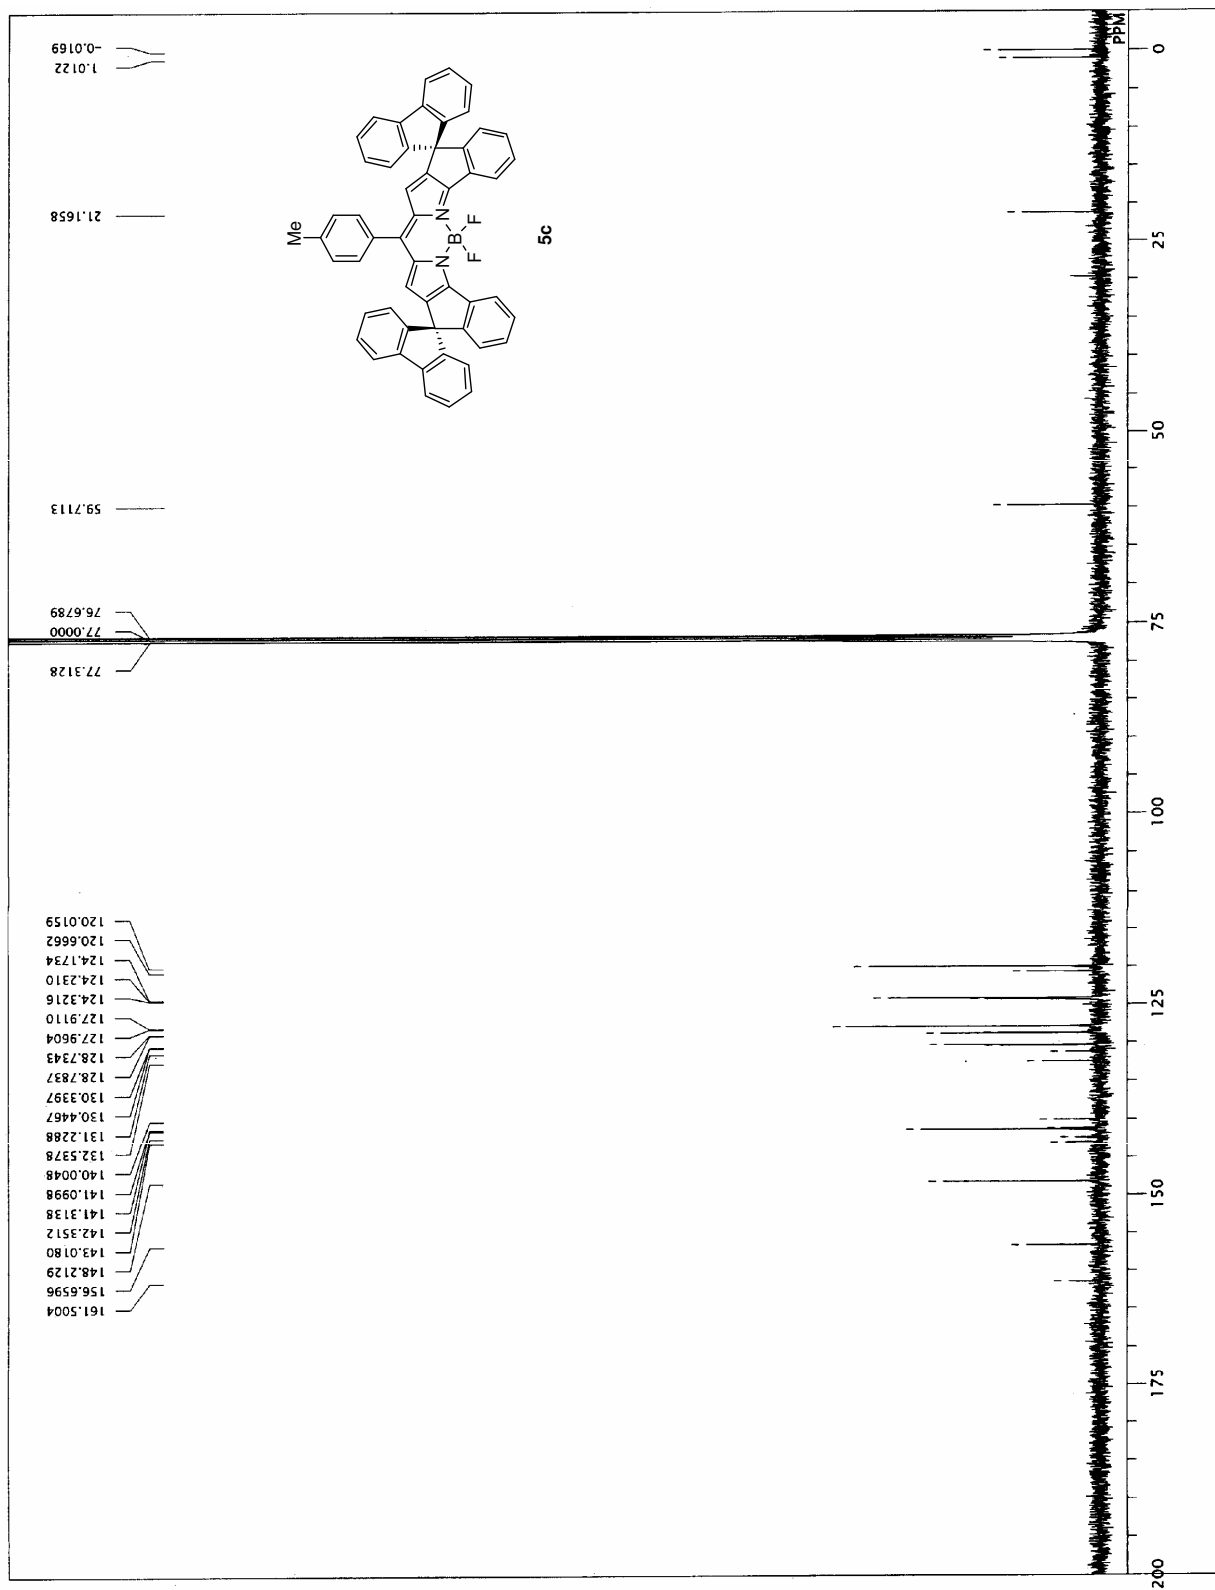

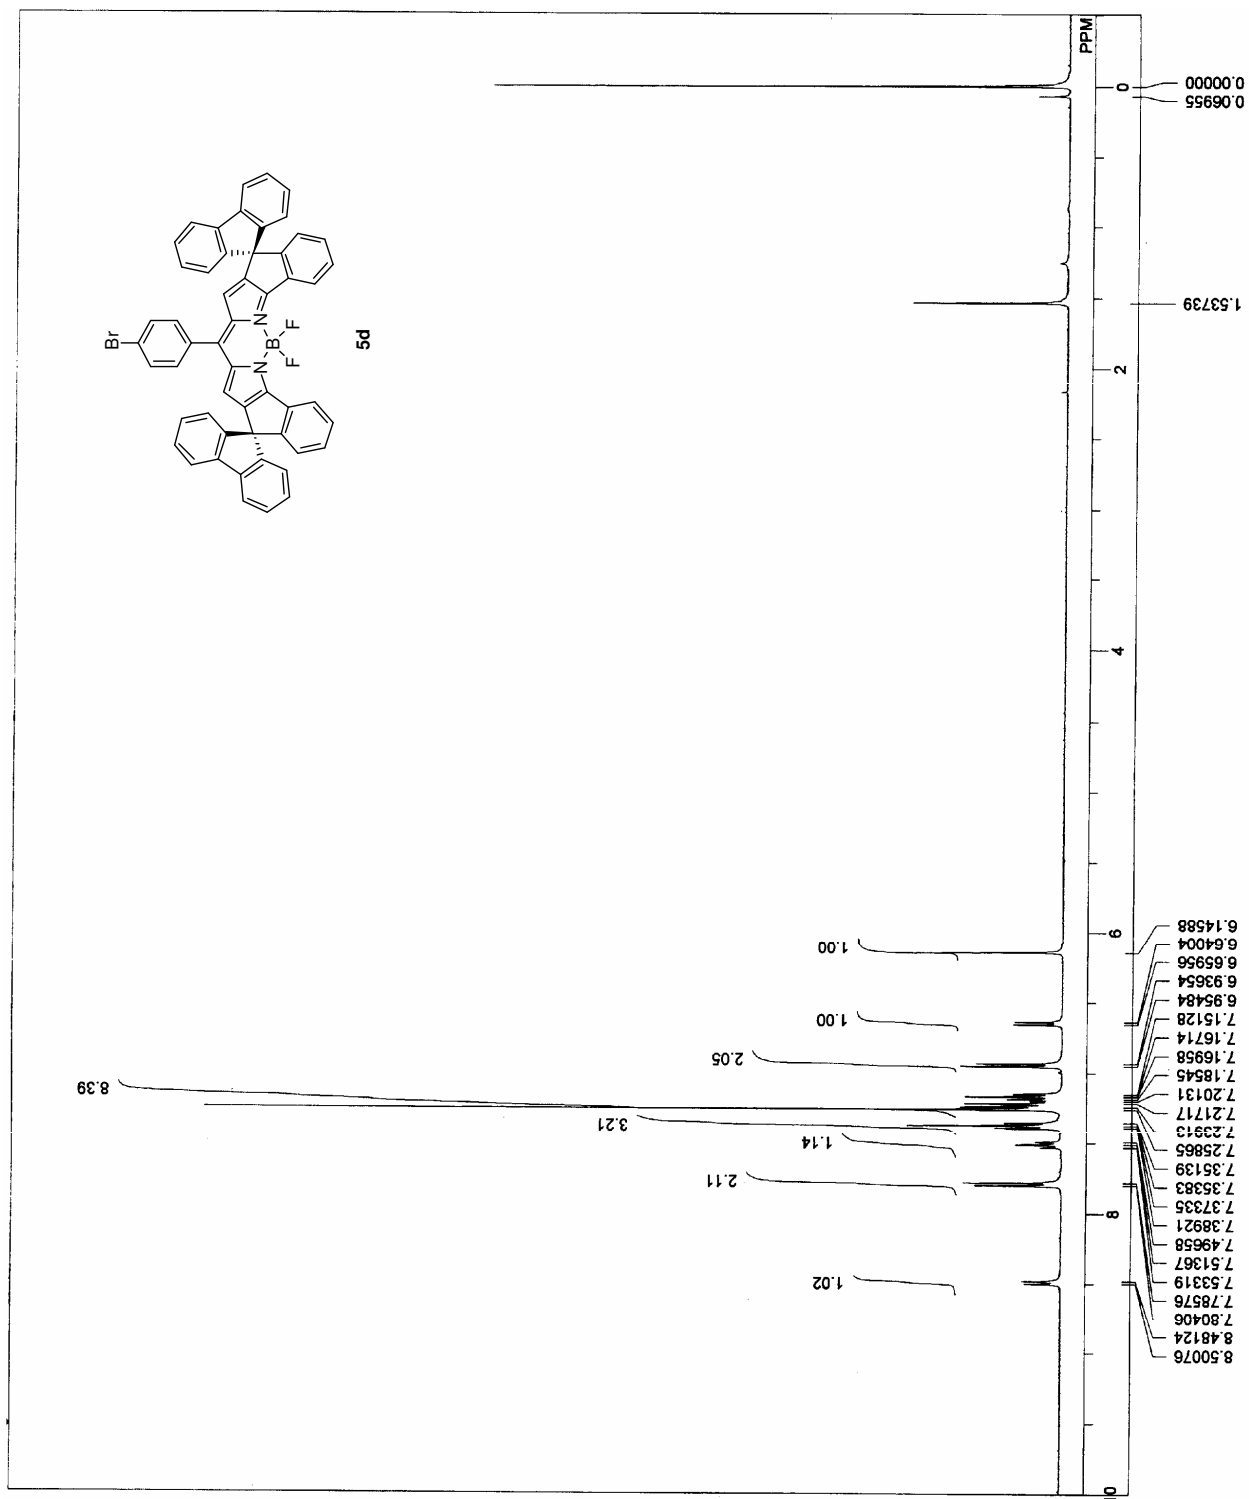

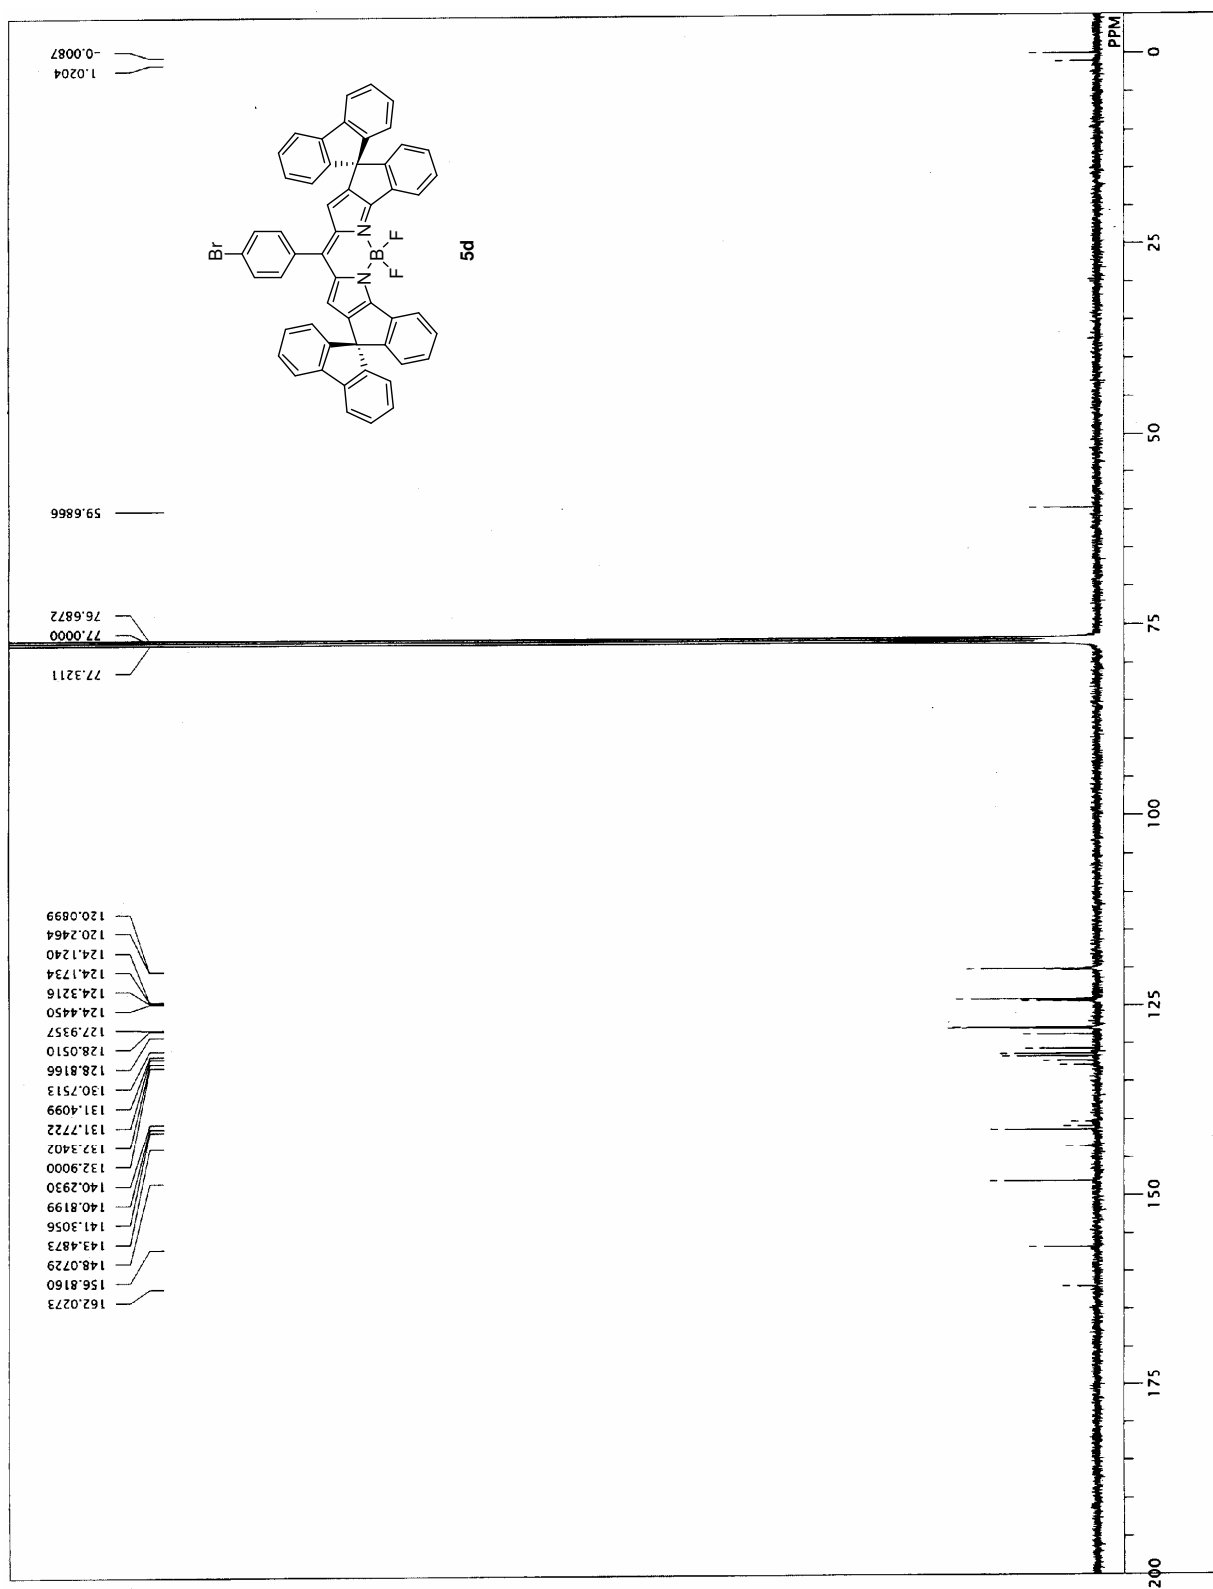

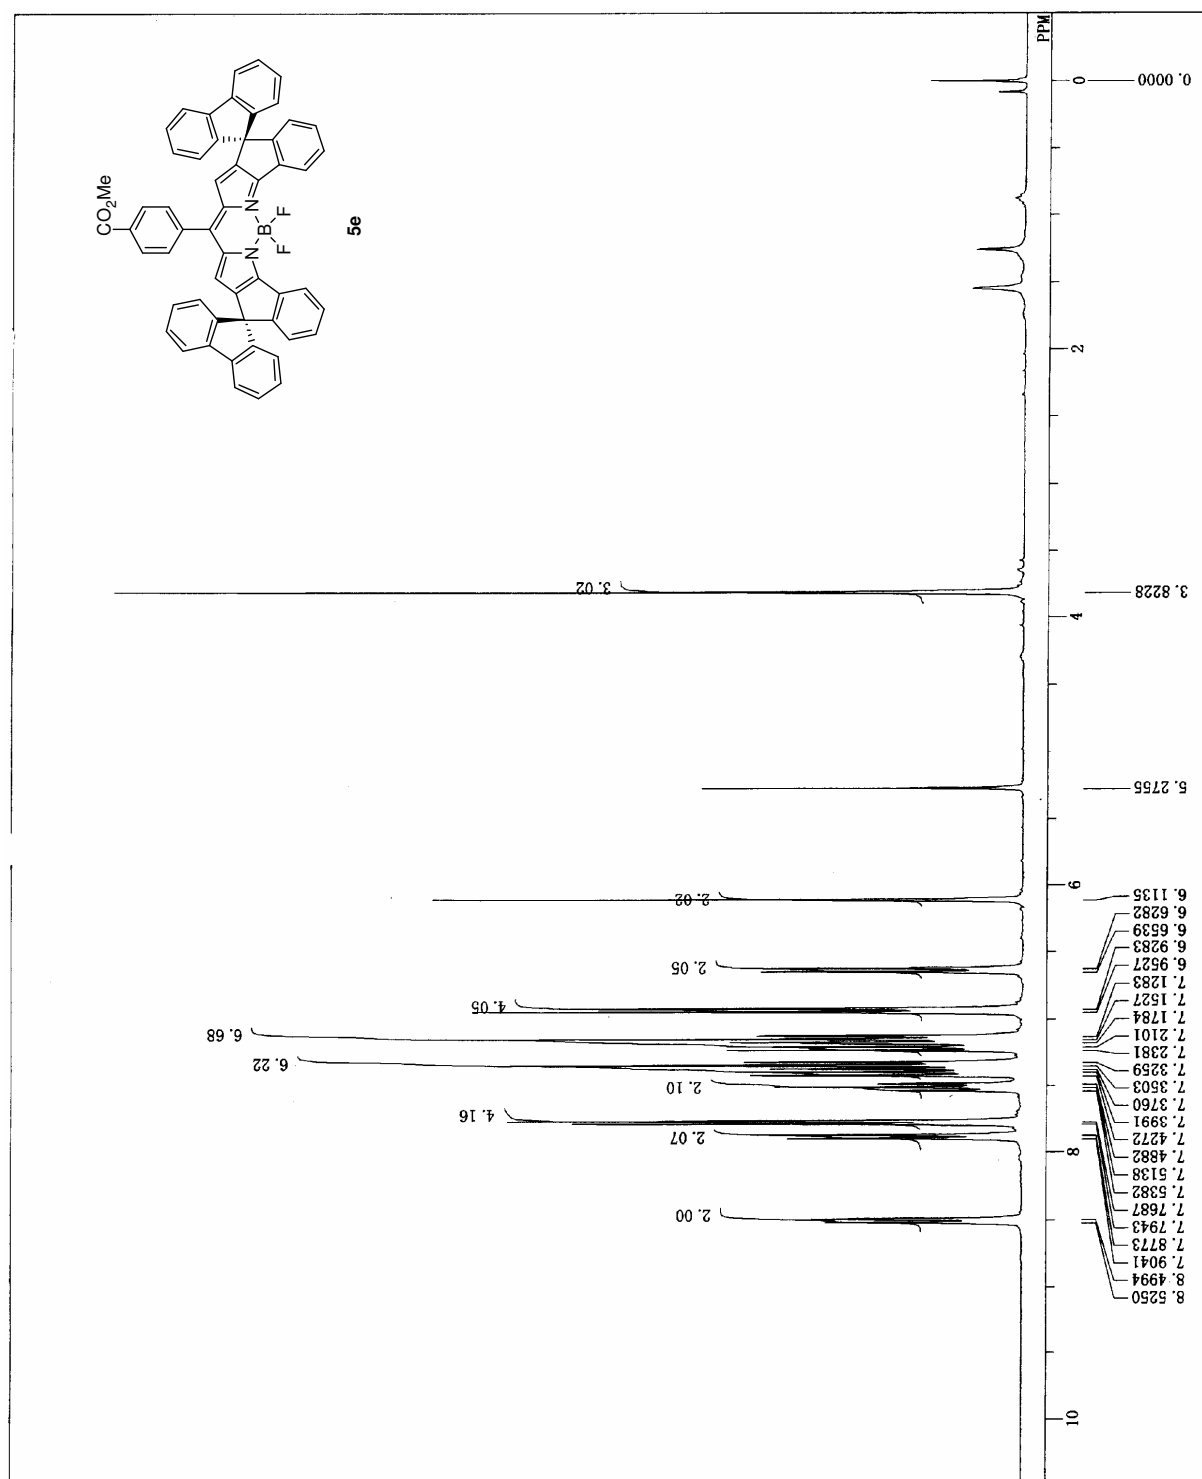



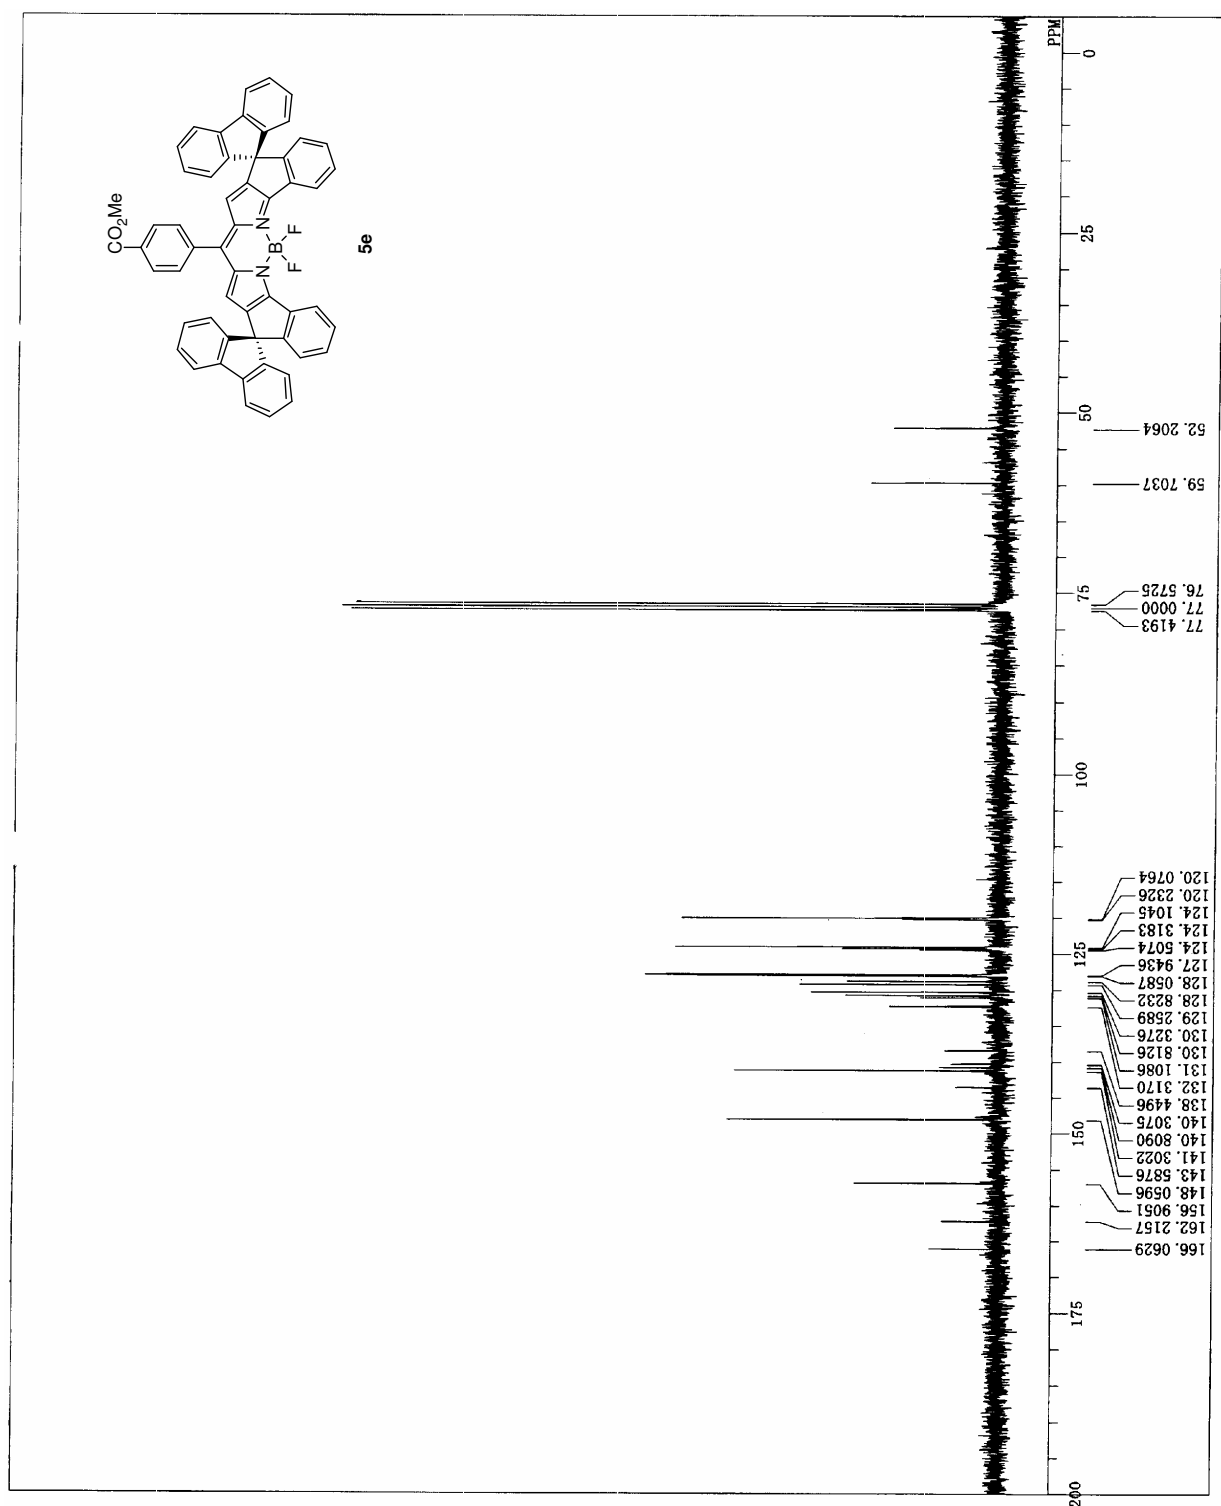

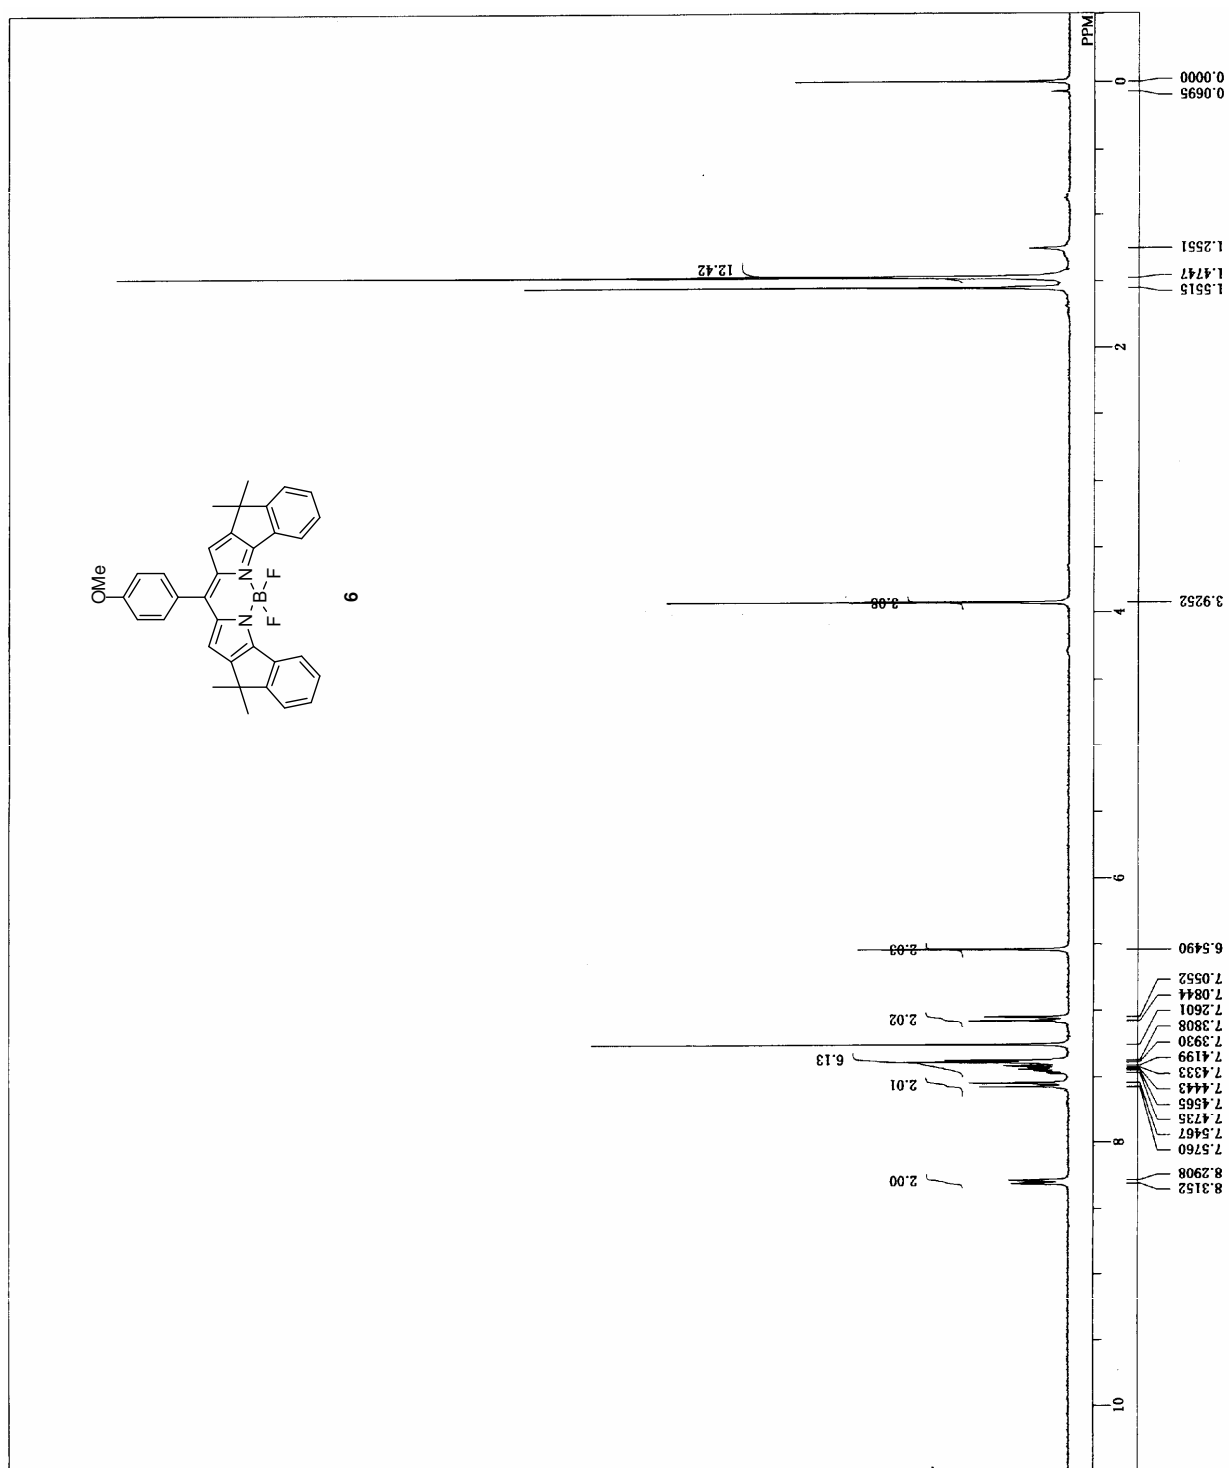

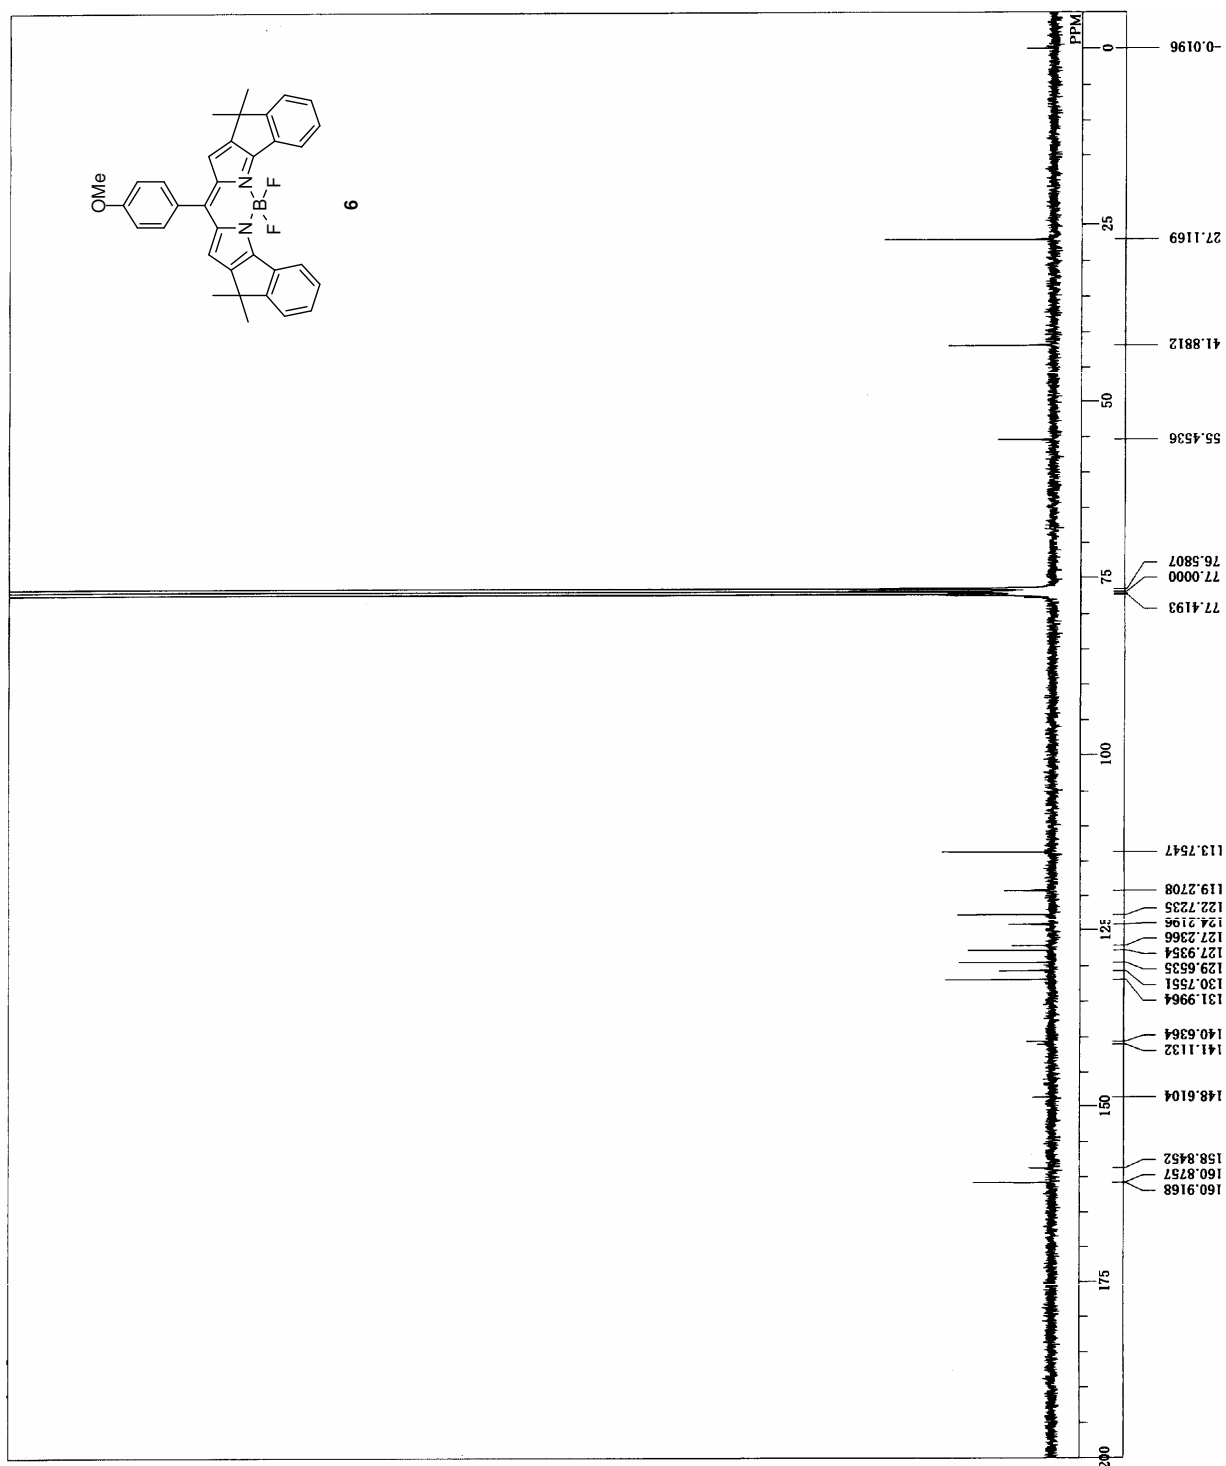

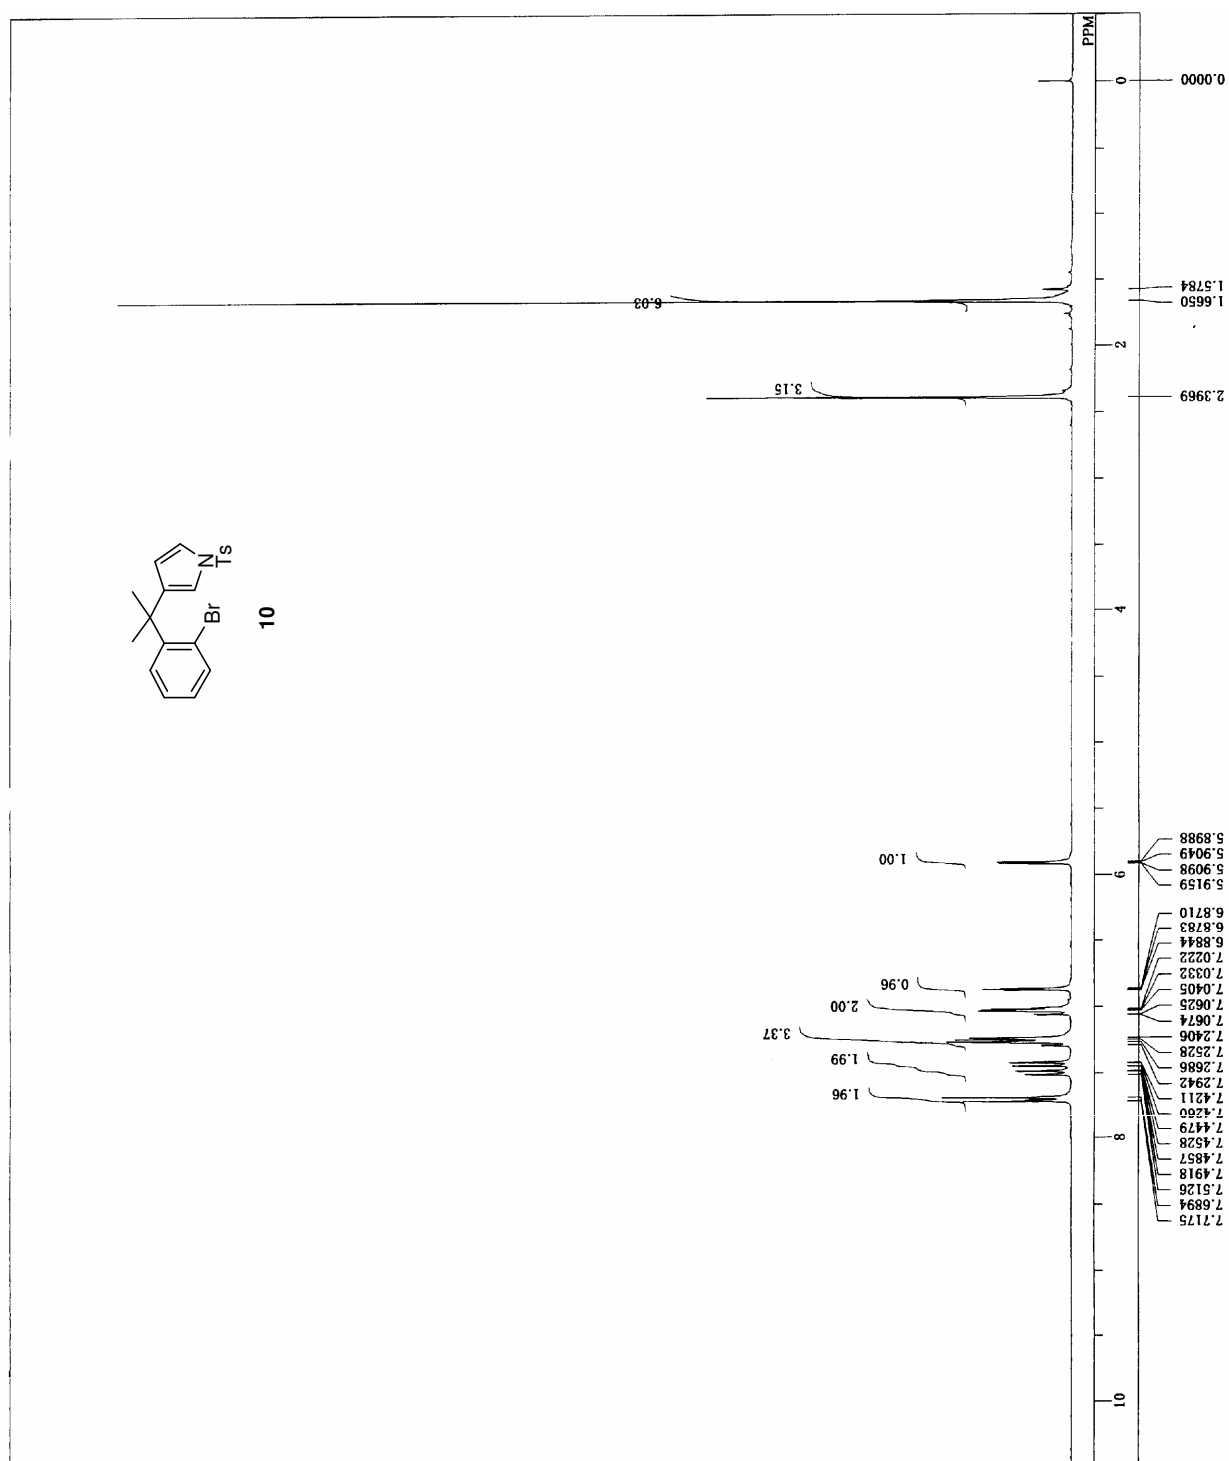

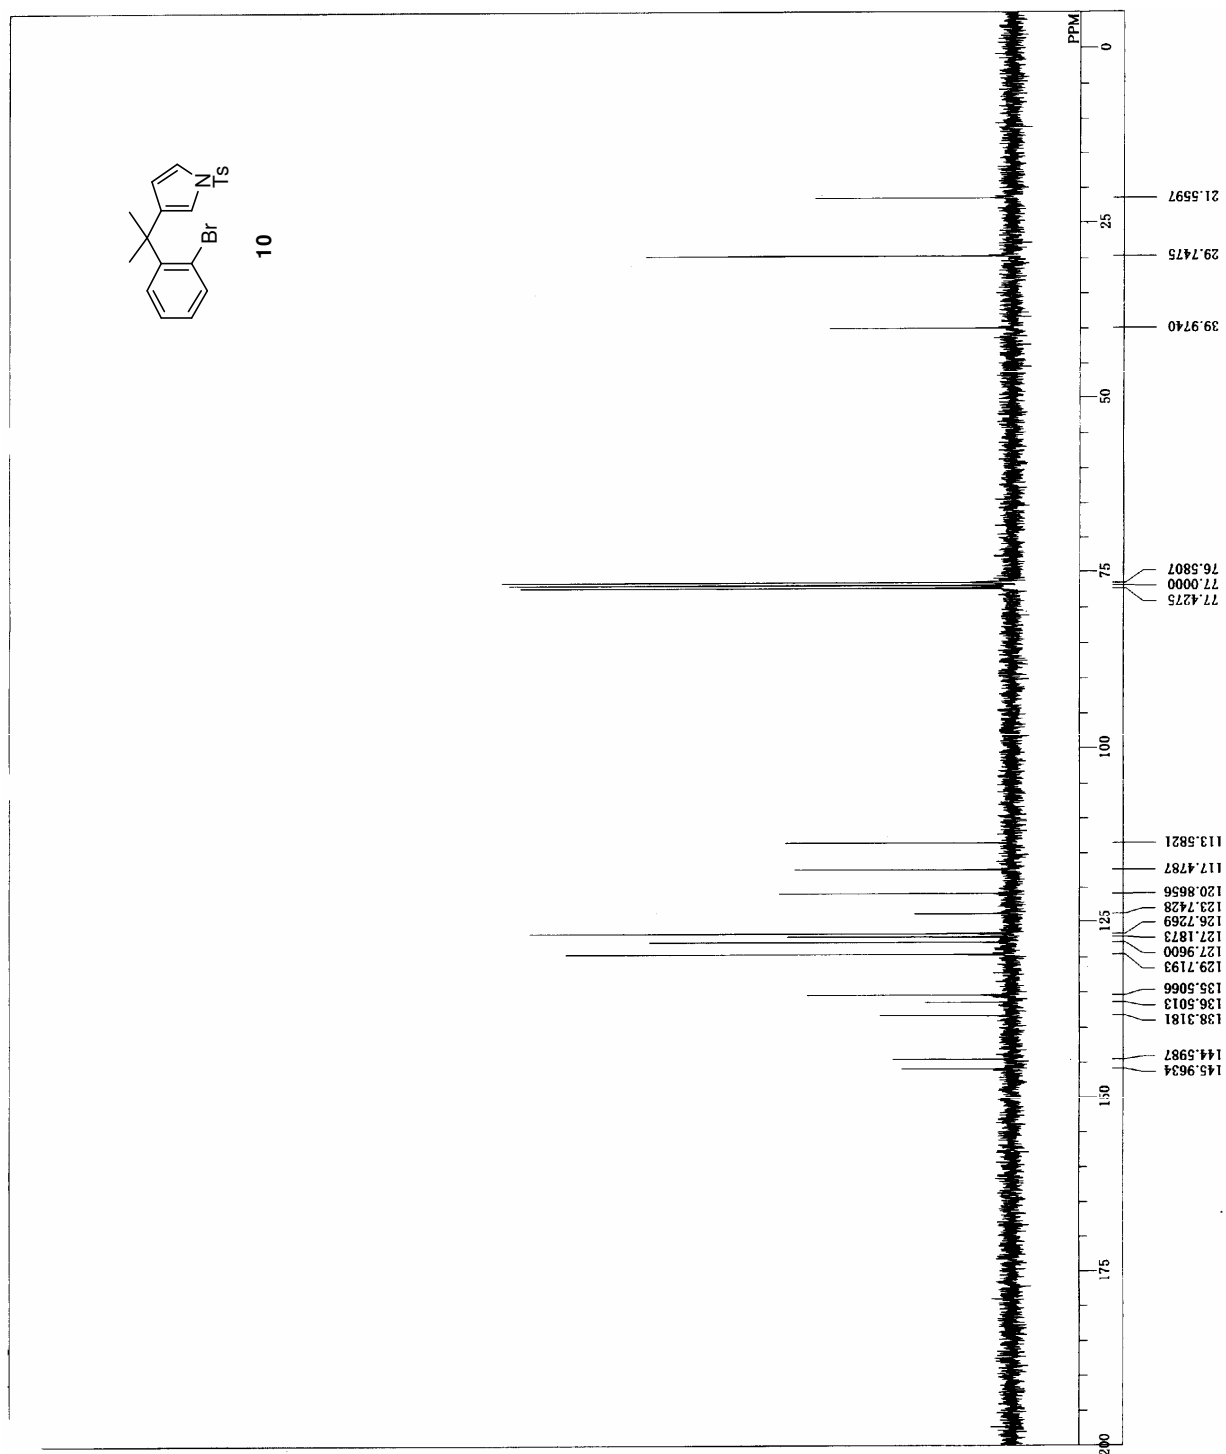

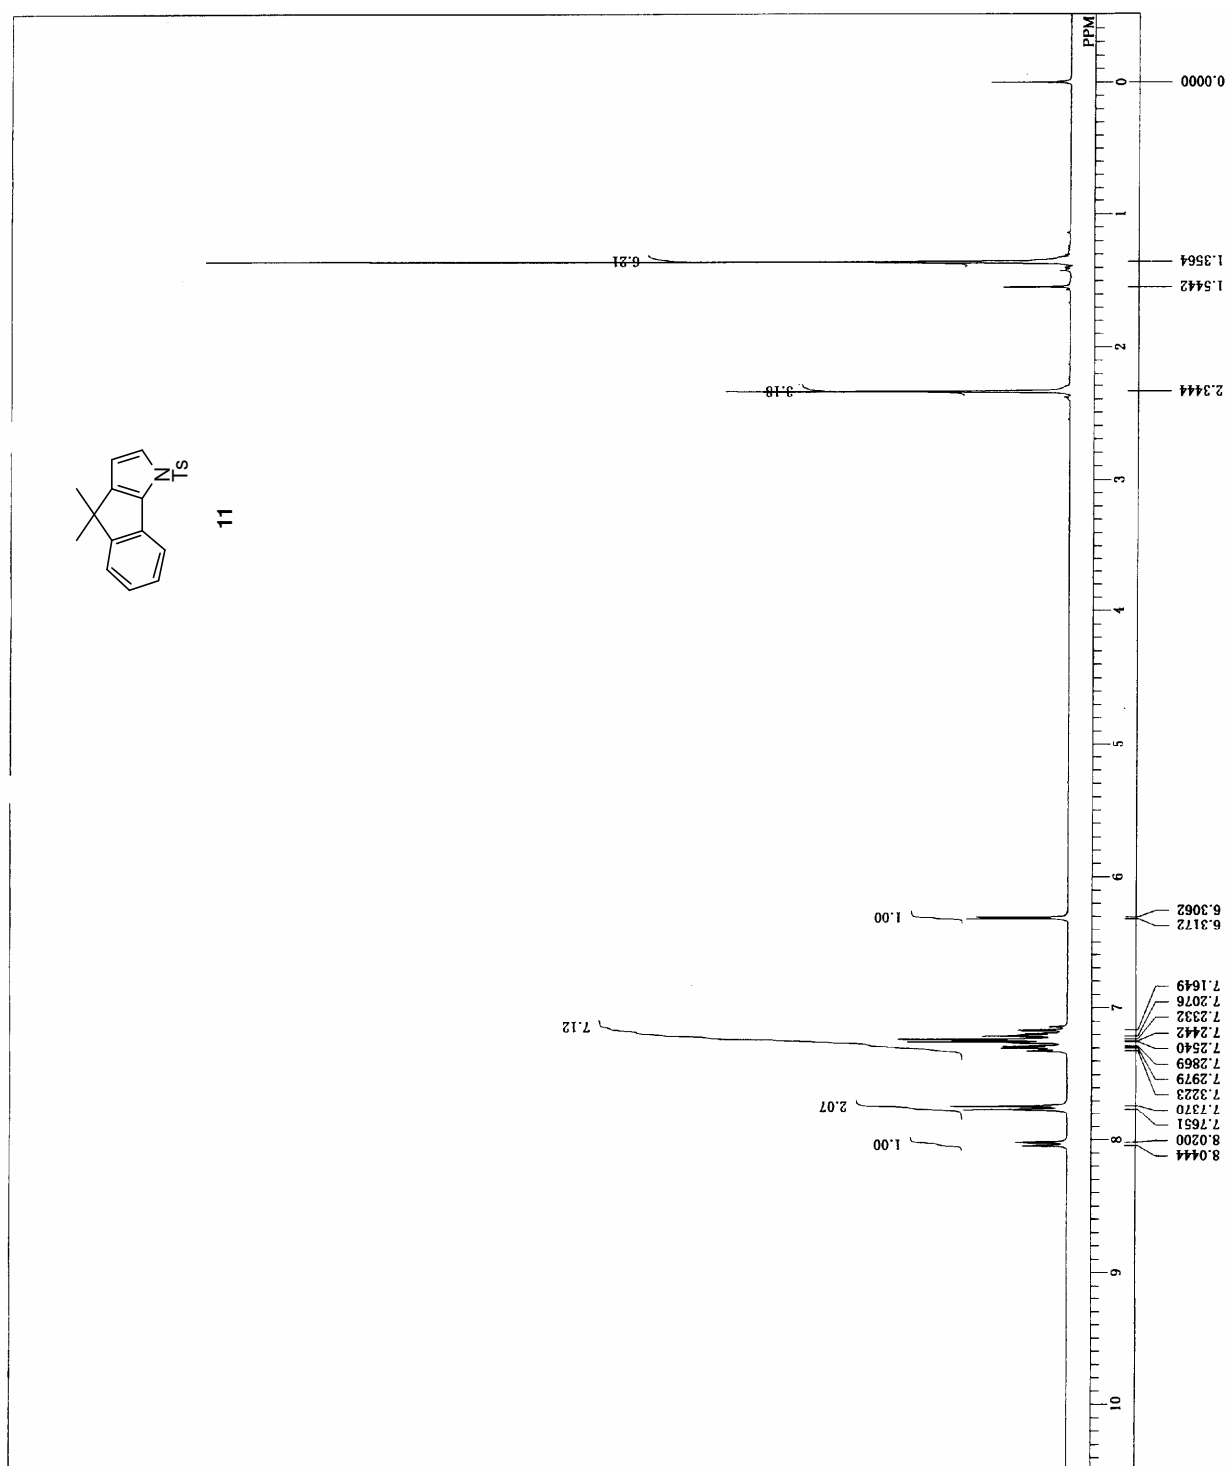

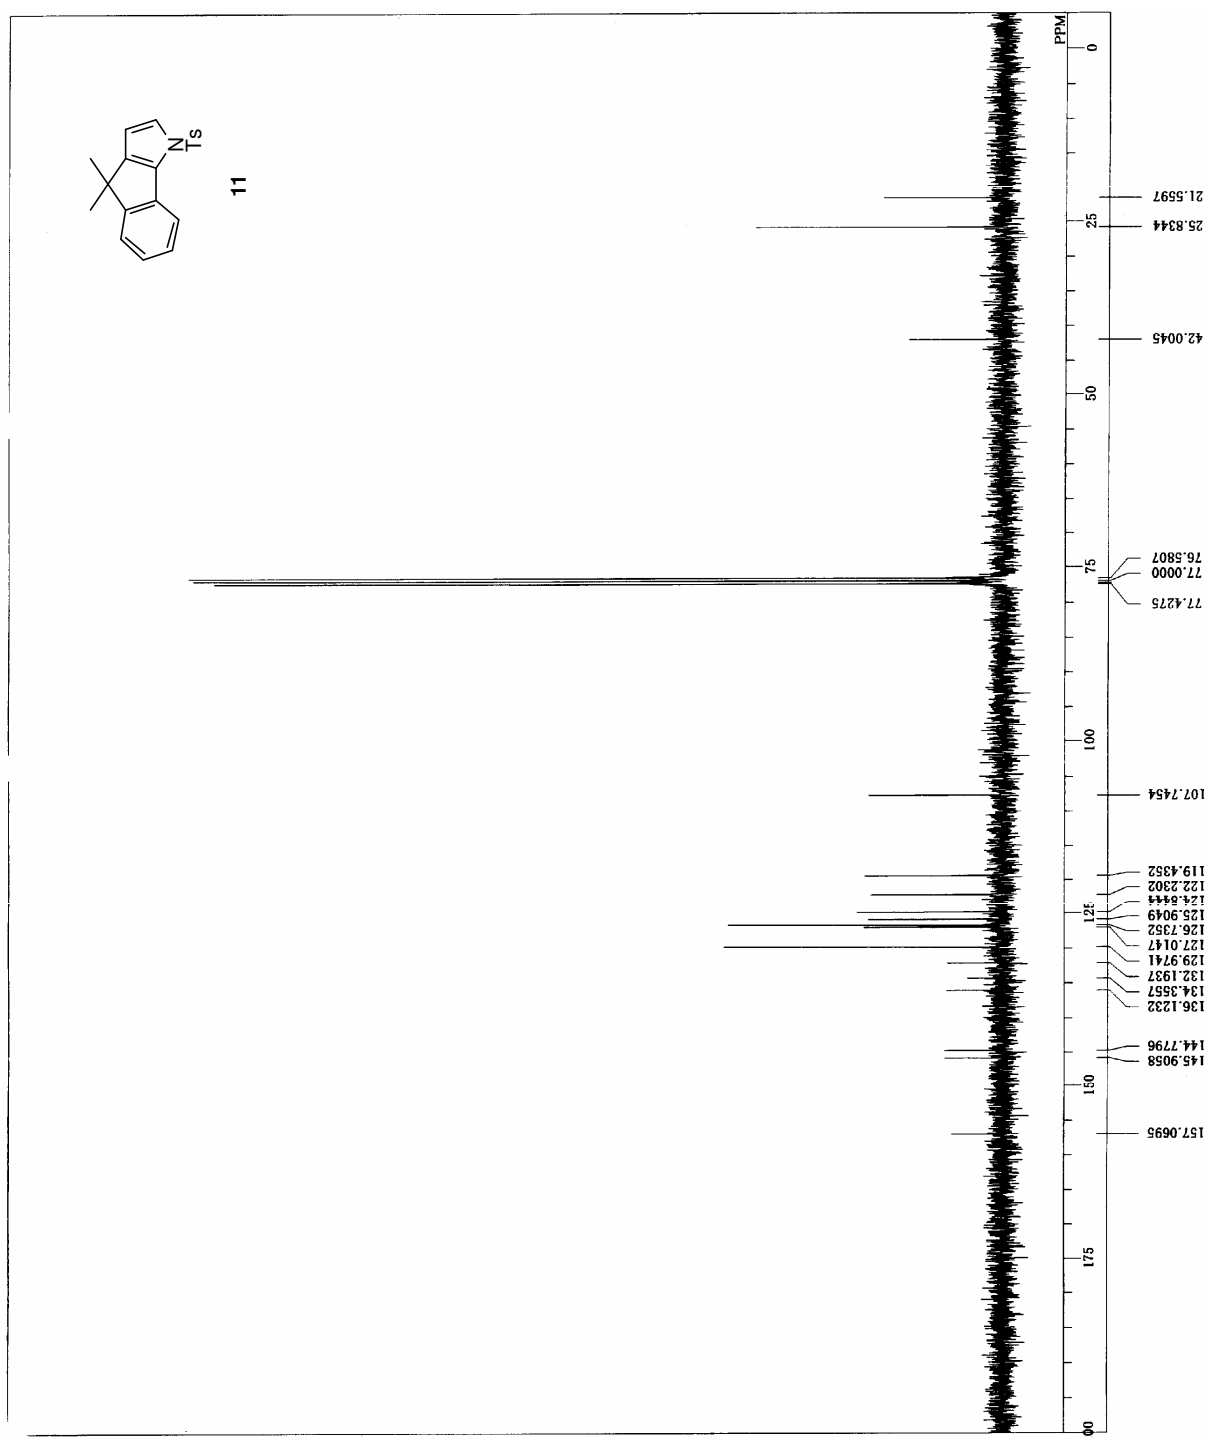

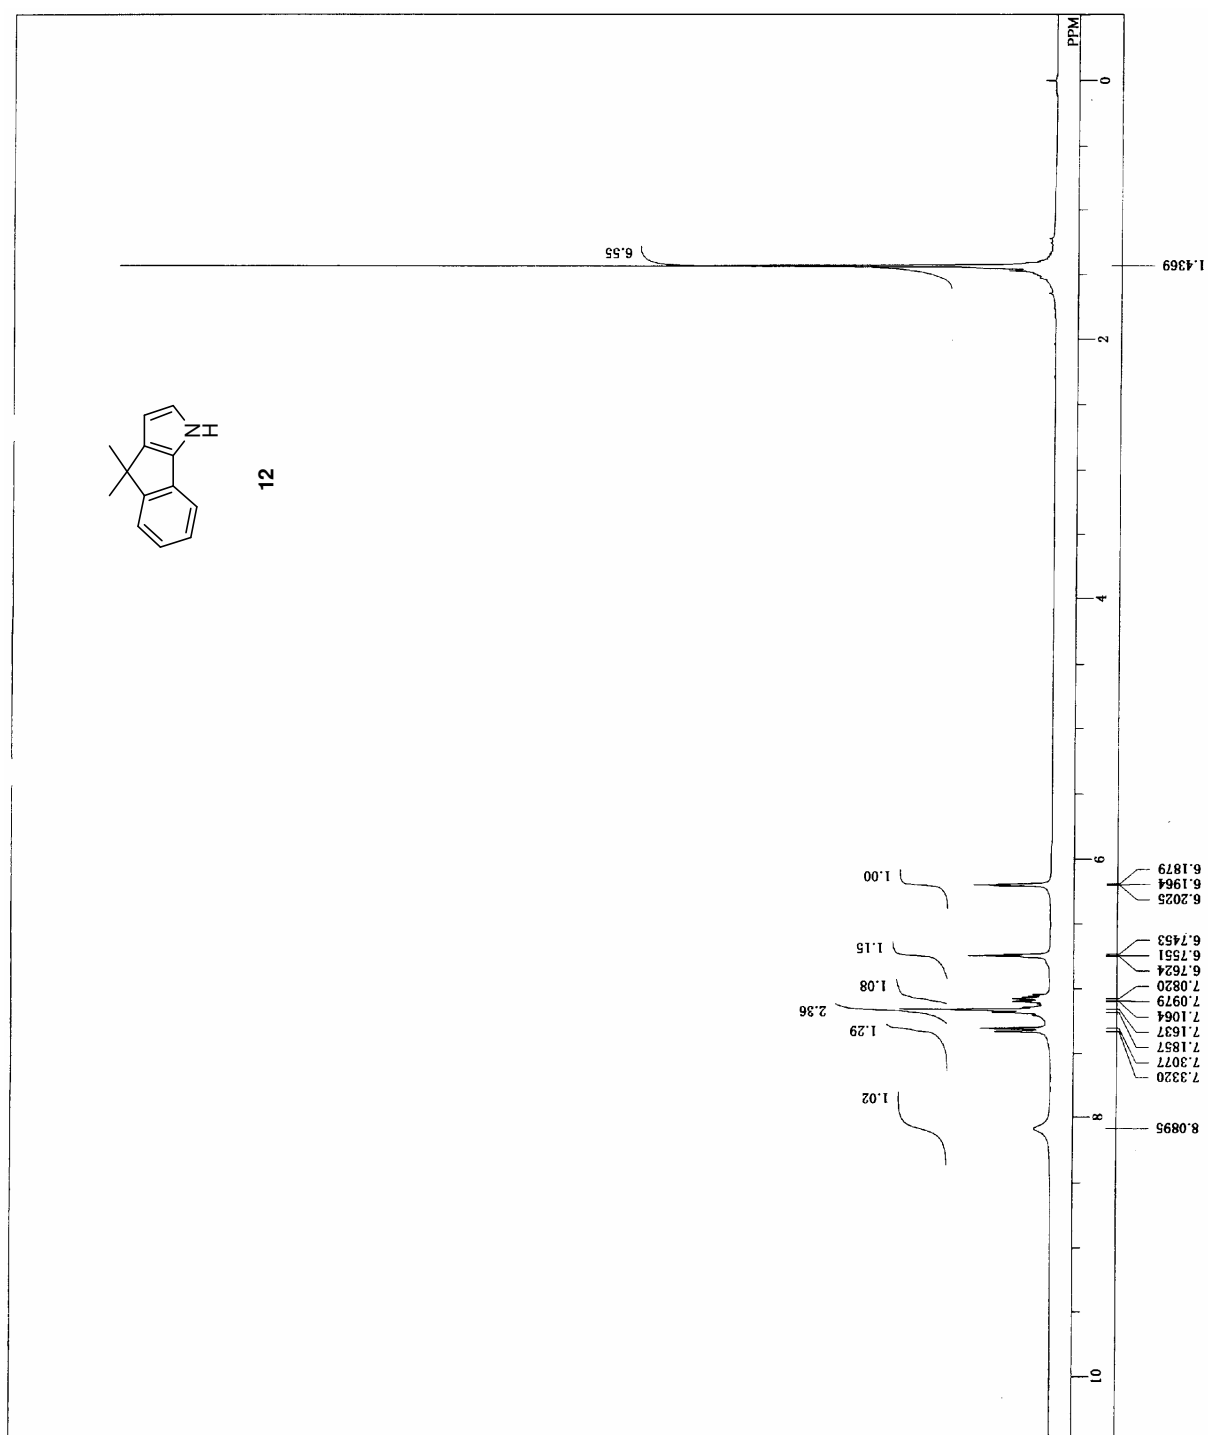



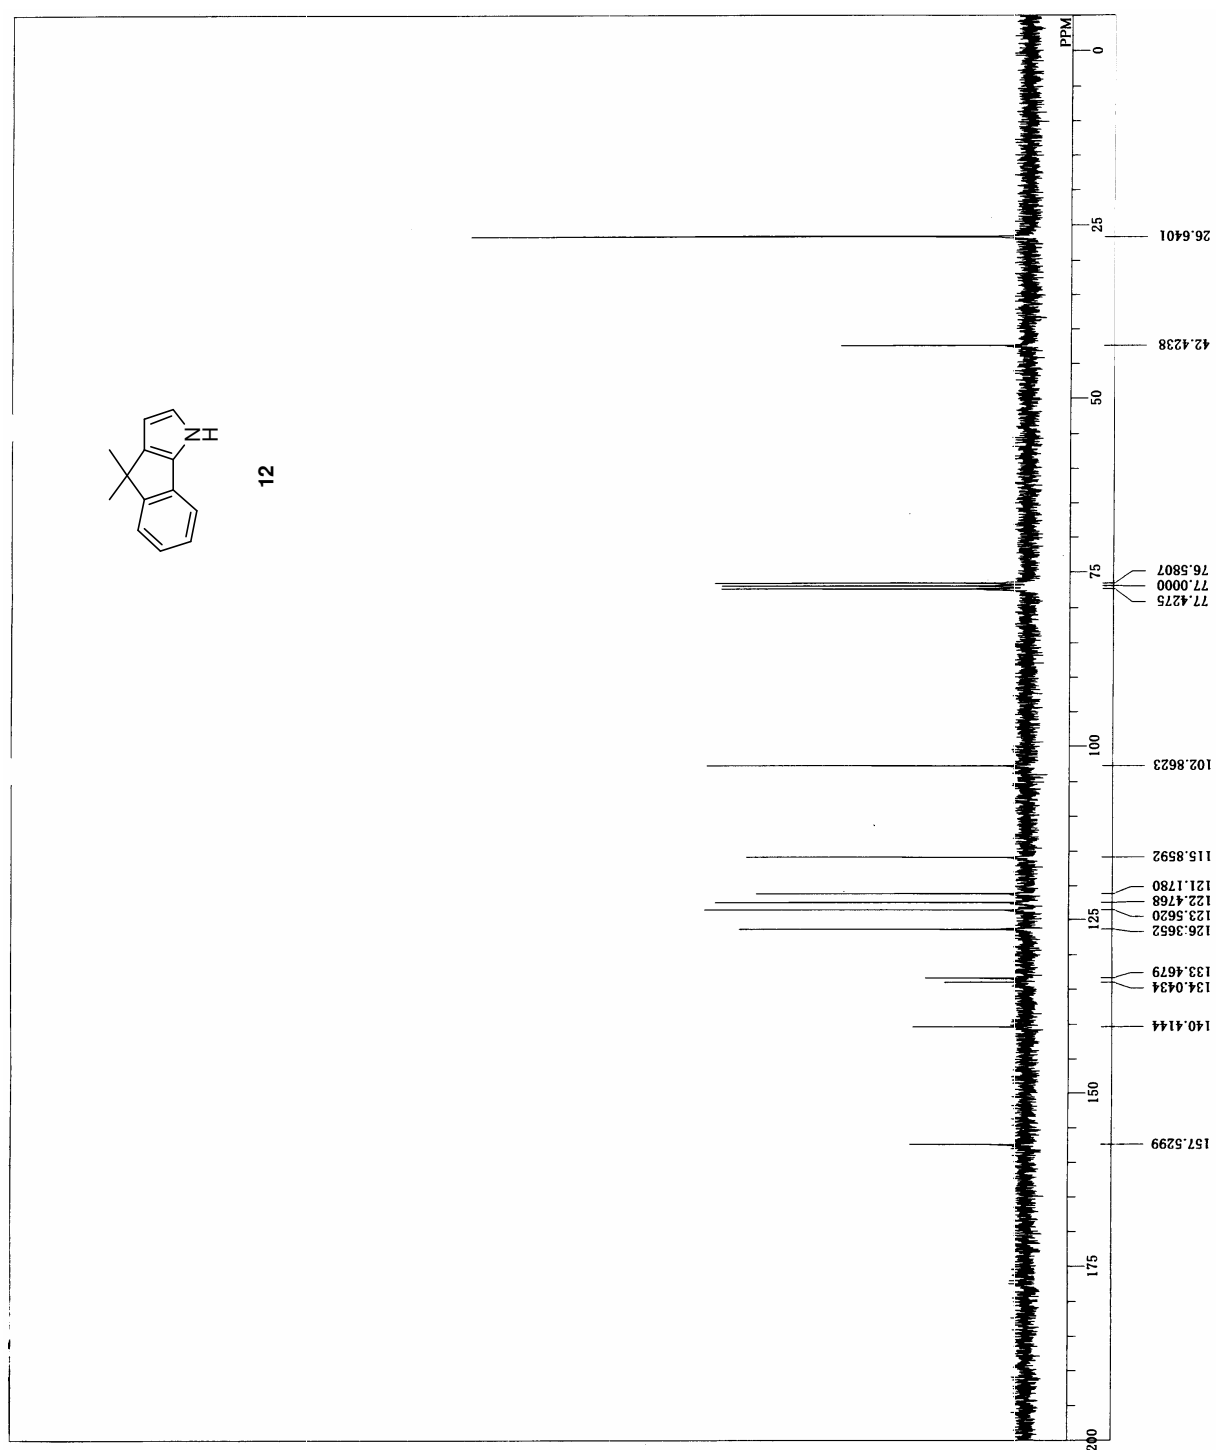

Supplement: Supplementary file 1 [file 4494049]
